# Supplementary material for: Characterization of the Immune Microenvironmental Landscape of Lung Squamous Cell Carcinoma with Immune Cell Infiltration
Source: Hindawi journal article supplement (doi:10.1155/2022/2361507), 2022-11-11
Supplement: f1 [file 2361507.f1.pdf]

**Table S1- Patients information**

| ID      | ICI score | ζ TMB group | ICI score+TMB     | ICI score | ICI gene cluster | ICI cluster | Stage | Age | Gender | Data source | ill survival (day) | Status |
|---------|-----------|-------------|-------------------|-----------|------------------|-------------|-------|-----|--------|-------------|--------------------|--------|
| TCGA-34 | High      | Low         | L-TMB+H-ICI score | 1.54404   | A                | C1          | 1,2   | 71  | Femal  | TCGA        | 2271               | Alive  |
| TCGA-96 | Low       | High        | H-TMB+L-ICI score | -0.9316   | B                | C1          | 1,2   | 83  | Male   | TCGA        | 2160               | Alive  |
| TCGA-85 | Low       | Low         | L-TMB+L-ICI score | -1.1379   | A                | C1          | 1,2   | 60  | Femal  | TCGA        | 910                | Alive  |
| TCGA-85 | High      | High        | H-TMB+H-ICI score | 1.31615   | A                | C4          | 1,2   | 71  | Male   | TCGA        | 383                | Alive  |
| TCGA-85 | High      | Low         | L-TMB+H-ICI score | -0.0794   | B                | C1          | 1,2   | 62  | Male   | TCGA        | 455                | Alive  |
| TCGA-66 | High      | High        | H-TMB+H-ICI score | 0.48593   | B                | C3          | 3,4   | 73  | Male   | TCGA        | 123                | Dead   |
| TCGA-22 | High      | High        | H-TMB+H-ICI score | 0.48451   | A                | C1          | 1,2   | 71  | Male   | TCGA        | 669                | Dead   |
| TCGA-96 | High      | Low         | L-TMB+H-ICI score | 1.62746   | A                | C4          | 1,2   | 78  | Femal  | TCGA        | 842                | Alive  |
| TCGA-77 | High      | High        | H-TMB+H-ICI score | -0.4646   | A                | C1          | 1,2   | 74  | Femal  | TCGA        | 1189               | Dead   |
| TCGA-63 | High      | High        | H-TMB+H-ICI score | 0.85194   | A                | C2          | 1,2   | 67  | Male   | TCGA        | 0                  | Dead   |
| TCGA-90 | High      | High        | H-TMB+H-ICI score | -0.0512   | A                | C2          | 1,2   | 70  | Male   | TCGA        | 428                | Alive  |
| TCGA-85 | High      | High        | H-TMB+H-ICI score | 0.04297   | B                | C2          | 1,2   | 58  | Male   | TCGA        | 111                | Alive  |
| TCGA-37 | High      | High        | H-TMB+H-ICI score | 0.46568   | A                | C4          | 1,2   | 65  | Male   | TCGA        | 13                 | Alive  |
| TCGA-O2 | High      | High        | H-TMB+H-ICI score | 1.64748   | B                | C2          | 3,4   | 71  | Femal  | TCGA        | 340                | Dead   |
| TCGA-58 | High      | High        | H-TMB+H-ICI score | 0.74257   | A                | C3          | 1,2   | 70  | Male   | TCGA        | 911                | Alive  |
| TCGA-66 | Low       | Low         | L-TMB+L-ICI score | -0.819    | B                | C4          | 1,2   | 71  | Male   | TCGA        | 61                 | Alive  |
| TCGA-77 | High      | High        | H-TMB+H-ICI score | 0.33032   | B                | C2          | 1,2   | 66  | Femal  | TCGA        | 351                | Dead   |
| TCGA-98 | High      | High        | H-TMB+H-ICI score | -0.7235   | B                | C2          | 1,2   | 67  | Male   | TCGA        | 826                | Alive  |
| TCGA-66 | High      | High        | H-TMB+H-ICI score | -0.1619   | A                | C4          | 1,2   | 65  | Male   | TCGA        | 60                 | Alive  |
| TCGA-43 | High      | Low         | L-TMB+H-ICI score | 0.54584   | B                | C2          | 1,2   | 70  | Male   | TCGA        | 849                | Alive  |
| TCGA-22 | High      | High        | H-TMB+H-ICI score | 0.35531   | A                | C2          | 1,2   | 67  | Male   | TCGA        | 1975               | Dead   |
| TCGA-60 | Low       | Low         | L-TMB+L-ICI score | -1.5816   | B                | C1          | 1,2   | 73  | Male   | TCGA        | 1154               | Dead   |
| TCGA-77 | High      | High        | H-TMB+H-ICI score | 0.24714   | B                | C2          | 1,2   | 74  | Male   | TCGA        | 2224               | Dead   |
| TCGA-63 | Low       | Low         | L-TMB+L-ICI score | -2.1814   | B                | C2          | 1,2   | 68  | Male   | TCGA        | 2148               | Alive  |
| TCGA-66 | High      | High        | H-TMB+H-ICI score | -0.3319   | B                | C1          | 1,2   | 62  | Femal  | TCGA        | 1311               | Alive  |
| TCGA-43 | Low       | High        | H-TMB+L-ICI score | -2.2177   | B                | C1          | 3,4   | 47  | Femal  | TCGA        | 1176               | Alive  |
| TCGA-52 | High      | Low         | L-TMB+H-ICI score | -0.4461   | B                | C2          | 1,2   | 67  | Male   | TCGA        | 266                | Dead   |
| TCGA-85 | Low       | High        | H-TMB+L-ICI score | -1.8357   | B                | C1          | 1,2   | 72  | Male   | TCGA        | 23                 | Alive  |
| TCGA-85 | High      | Low         | L-TMB+H-ICI score | 0.99308   | B                | C4          | 1,2   | 63  | Male   | TCGA        | 61                 | Alive  |
| TCGA-94 | High      | Low         | L-TMB+H-ICI score | 0.60285   | A                | C2          | 1,2   | 73  | Male   | TCGA        | 640                | Alive  |
| TCGA-60 | High      | Low         | L-TMB+H-ICI score | -0.7151   | B                | C1          | 1,2   | 41  | Male   | TCGA        | 372                | Dead   |
| TCGA-77 | High      | Low         | L-TMB+H-ICI score | 0.01001   | B                | C3          | 3,4   | 73  | Male   | TCGA        | 212                | Dead   |
| TCGA-85 | High      | High        | H-TMB+H-ICI score | 0.03992   | B                | C3          | 1,2   | 71  | Male   | TCGA        | 911                | Alive  |
| TCGA-39 | High      | High        | H-TMB+H-ICI score | 1.95209   | B                | C2          | 3,4   | 59  | Male   | TCGA        | 519                | Dead   |
| TCGA-66 | Low       | High        | H-TMB+L-ICI score | -0.8528   | A                | C1          | 3,4   | 68  | Male   | TCGA        | 122                | Alive  |
| TCGA-33 | High      | High        | H-TMB+H-ICI score | -0.4233   | B                | C2          | 3,4   | 57  | Male   | TCGA        | 428                | Dead   |
| TCGA-NC | High      | High        | H-TMB+H-ICI score | 1.39553   | A                | C2          | 1,2   | 53  | Male   | TCGA        | 37                 | Alive  |
| TCGA-22 | High      | High        | H-TMB+H-ICI score | 1.39343   | B                | C1          | 1,2   | 69  | Male   | TCGA        | 131                | Dead   |
| TCGA-60 | High      | High        | H-TMB+H-ICI score | 0.63113   | A                | C2          | 1,2   | 74  | Femal  | TCGA        | 642                | Alive  |
| TCGA-77 | High      | High        | H-TMB+H-ICI score | -0.6417   | A                | C2          | 1,2   | 70  | Male   | TCGA        | 1884               | Alive  |
| TCGA-63 | High      | High        | H-TMB+H-ICI score | -0.163    | B                | C4          | 1,2   | 56  | Male   | TCGA        | 769                | Alive  |
| TCGA-22 | High      | Low         | L-TMB+H-ICI score | -0.1717   | B                | C2          | 1,2   | 61  | Male   | TCGA        | 223                | Dead   |
| TCGA-21 | High      | High        | H-TMB+H-ICI score | 0.18106   | B                | C2          | 1,2   | 69  | Male   | TCGA        | 284                | Dead   |
| TCGA-O2 | High      | High        | H-TMB+H-ICI score | -0.1563   | B                | C2          | 1,2   | 75  | Femal  | TCGA        | 1335               | Dead   |
| TCGA-33 | High      | High        | H-TMB+H-ICI score | 0.80011   | B                | C2          | 1,2   | 66  | Male   | TCGA        | 211                | Dead   |
| TCGA-63 | High      | High        | H-TMB+H-ICI score | -0.4769   | B                | C2          | 1,2   | 67  | Male   | TCGA        | 0                  | Dead   |
| TCGA-96 | High      | High        | H-TMB+H-ICI score | 0.34545   | B                | C2          | 1,2   | 75  | Femal  | TCGA        | 531                | Alive  |
| TCGA-63 | High      | High        | H-TMB+H-ICI score | 2.86557   | B                | C3          | 1,2   | 76  | Male   | TCGA        | 1639               | Alive  |
| TCGA-37 | High      | High        | H-TMB+H-ICI score | -0.5751   | A                | C1          | 1,2   | 69  | Male   | TCGA        | 12                 | Alive  |
| TCGA-56 | High      | Low         | L-TMB+H-ICI score | -0.6436   | B                | C2          | 1,2   | 70  | Male   | TCGA        | 405                | Alive  |
| TCGA-56 | High      | High        | H-TMB+H-ICI score | 3.77414   | B                | C2          | 1,2   | 56  | Male   | TCGA        | 150                | Alive  |
| TCGA-98 | High      | High        | H-TMB+H-ICI score | 2.84831   | B                | C1          | 1,2   | 76  | Femal  | TCGA        | 618                | Alive  |
| TCGA-94 | High      | High        | H-TMB+H-ICI score | 0.39569   | A                | C2          | 1,2   | 71  | Femal  | TCGA        | 430                | Alive  |
| TCGA-43 | High      | High        | H-TMB+H-ICI score | 2.49428   | A                | C2          | 1,2   | 75  | Femal  | TCGA        | 2378               | Alive  |
| TCGA-NC | High      | High        | H-TMB+H-ICI score | -0.7493   | A                | C2          | 1,2   | 77  | Male   | TCGA        | 1499               | Alive  |
| TCGA-63 | Low       | High        | H-TMB+L-ICI score | -1.1087   | B                | C4          | 1,2   | 67  | Male   | TCGA        | 2142               | Alive  |
| TCGA-22 | High      | High        | H-TMB+H-ICI score | 0.51192   | A                | C4          | 1,2   | 75  | Male   | TCGA        | 1845               | Alive  |
| TCGA-77 | High      | High        | H-TMB+H-ICI score | 0.41257   | B                | C4          | 1,2   | 74  | Male   | TCGA        | 1640               | Dead   |
| TCGA-37 | High      | High        | H-TMB+H-ICI score | 0.48811   | A                | C1          | 1,2   | 49  | Male   | TCGA        | 867                | Alive  |
| TCGA-85 | High      | High        | H-TMB+H-ICI score | 0.89373   | A                | C2          | 1,2   | 52  | Male   | TCGA        | 815                | Alive  |
| TCGA-NC | High      | High        | H-TMB+H-ICI score | 0.81118   | B                | C3          | 3,4   | 69  | Male   | TCGA        | 770                | Alive  |
| TCGA-85 | High      | Low         | L-TMB+H-ICI score | 4.53431   | A                | C4          | 1,2   | 61  | Male   | TCGA        | 741                | Alive  |
| TCGA-33 | High      | High        | H-TMB+H-ICI score | 0.27969   | A                | C2          | 1,2   | 55  | Male   | TCGA        | 3149               | Dead   |
| TCGA-43 | High      | High        | H-TMB+H-ICI score | 0.26494   | A                | C2          | 1,2   | 59  | Femal  | TCGA        | 550                | Alive  |
| TCGA-34 | High      | High        | H-TMB+H-ICI score | 0.51767   | A                | C2          | 1,2   | 80  | Male   | TCGA        | 1031               | Alive  |
| TCGA-56 | High      | High        | H-TMB+H-ICI score | -0.0617   | A                | C2          | 1,2   | 74  | Male   | TCGA        | 510                | Alive  |
| TCGA-18 | High      | High        | H-TMB+H-ICI score | -0.0013   | B                | C2          | 1,2   | 50  | Male   | TCGA        | 827                | Dead   |
| TCGA-21 | Low       | Low         | L-TMB+L-ICI score | -1.0015   | A                | C4          | 1,2   | 80  | Femal  | TCGA        | 1268               | Alive  |
| TCGA-90 | High      | High        | H-TMB+H-ICI score | -0.6047   | B                | C2          | 1,2   | 69  | Male   | TCGA        | 615                | Alive  |
| TCGA-MF | High      | High        | H-TMB+H-ICI score | -0.2956   | B                | C2          | 1,2   | 54  | Male   | TCGA        | 360                | Alive  |
| TCGA-46 | High      | High        | H-TMB+H-ICI score | -0.6162   | B                | C2          | 3,4   | 58  | Male   | TCGA        | 299                | Dead   |
| TCGA-77 | Low       | High        | H-TMB+L-ICI score | -1.5691   | A                | C1          | 3,4   | 62  | Femal  | TCGA        | 2133               | Dead   |
| TCGA-56 | High      | Low         | L-TMB+H-ICI score | 0.51221   | B                | C2          | 1,2   | 66  | Male   | TCGA        | 543                | Alive  |
| TCGA-85 | High      | High        | H-TMB+H-ICI score | -0.526    | B                | C2          | 1,2   | 71  | Male   | TCGA        | 960                | Alive  |
| TCGA-56 | High      | High        | H-TMB+H-ICI score | -0.5422   | B                | C2          | 3,4   | 61  | Male   | TCGA        | 951                | Alive  |
| TCGA-NC | High      | High        | H-TMB+H-ICI score | 0.18439   | A                | C2          | 3,4   | 59  | Male   | TCGA        | 1963               | Alive  |
| TCGA-56 | Low       | High        | H-TMB+L-ICI score | -0.9517   | B                | C2          | 1,2   | 72  | Male   | TCGA        | 105                | Alive  |
| TCGA-60 | High      | High        | H-TMB+H-ICI score | 0.32033   | B                | C3          | 1,2   | 73  | Male   | TCGA        | 2945               | Dead   |
| TCGA-39 | High      | High        | H-TMB+H-ICI score | -0.5007   | A                | C2          | 1,2   | 73  | Male   | TCGA        | 2165               | Alive  |
| TCGA-33 | High      | High        | H-TMB+H-ICI score | 0.20045   | A                | C2          | 3,4   | 71  | Male   | TCGA        | 601                | Dead   |
| TCGA-34 | Low       | Low         | L-TMB+L-ICI score | -1.759    | B                | C1          | 1,2   | 84  | Male   | TCGA        | 1000               | Dead   |
| TCGA-39 | High      | High        | H-TMB+H-ICI score | 0.35741   | A                | C2          | 3,4   | 65  | Femal  | TCGA        | 2510               | Alive  |
| TCGA-77 | High      | High        | H-TMB+H-ICI score | 0.80456   | A                | C2          | 1,2   | 59  | Femal  | TCGA        | 2227               | Alive  |
| TCGA-85 | High      | High        | H-TMB+H-ICI score | 1.12182   | A                | C2          | 1,2   | 61  | Male   | TCGA        | 683                | Alive  |
| TCGA-O2 | High      | High        | H-TMB+H-ICI score | -0.2057   | B                | C4          | 3,4   | 44  | Femal  | TCGA        | 113                | Dead   |
| TCGA-68 | High      | High        | H-TMB+H-ICI score | -0.2026   | A                | C2          | 1,2   | 66  | Male   | TCGA        | 244                | Alive  |
| TCGA-70 | High      | Low         | L-TMB+H-ICI score | 0.19814   | A                | C2          | 1,2   | 65  | Male   | TCGA        | 375                | Alive  |
| TCGA-68 | High      | High        | H-TMB+H-ICI score | 1.05175   | B                | C1          | 1,2   | 78  | Male   | TCGA        | 406                | Alive  |
| TCGA-85 | High      | High        | H-TMB+H-ICI score | -0.2714   | A                | C2          | 1,2   | 49  | Male   | TCGA        | 1063               | Alive  |
| TCGA-66 | High      | High        | H-TMB+H-ICI score | 1.45638   | A                | C2          | 3,4   | 68  | Male   | TCGA        | 30                 | Alive  |
| TCGA-85 | Low       | High        | H-TMB+L-ICI score | -3.134    | A                | C1          | 1,2   | 66  | Male   | TCGA        | 1224               | Alive  |
| TCGA-94 | High      | High        | H-TMB+H-ICI score | 0.88289   | B                | C2          | 1,2   | 80  | Male   | TCGA        | 559                | Alive  |
| TCGA-22 | Low       | Low         | L-TMB+L-ICI score | -3.4492   | B                | C4          | 1,2   | 73  | Male   | TCGA        | 53                 | Dead   |
| TCGA-85 | High      | High        | H-TMB+H-ICI score | 0.69447   | A                | C2          | 1,2   | 73  | Male   | TCGA        | 550                | Alive  |
| TCGA-63 | High      | High        | H-TMB+H-ICI score | 1.5471    | B                | C2          | 1,2   | 68  | Male   | TCGA        | 2026               | Alive  |
| TCGA-94 | High      | High        | H-TMB+H-ICI score | -0.3459   | B                | C2          | 1,2   | 70  | Male   | TCGA        | 153                | Alive  |

|               |      |                   |           |    |     |           |      |            |
|---------------|------|-------------------|-----------|----|-----|-----------|------|------------|
| TCGA-85- High | High | H-TMB+H-ICI score | -0.2802 B | C3 | 1,2 | 70 Male   | TCGA | 236 Alive  |
| TCGA-60- High | Low  | L-TMB+H-ICI score | 0.53458 B | C2 | 1,2 | 39 Male   | TCGA | 1475 Alive |
| TCGA-O2 High  | High | H-TMB+H-ICI score | -0.4238 B | C2 | 3,4 | 57 Female | TCGA | 387 Dead   |
| TCGA-51- High | High | H-TMB+H-ICI score | -0.2236 B | C2 | 1,2 | 65 Male   | TCGA | 12 Dead    |
| TCGA-22- Low  | High | H-TMB+L-ICI score | -0.8782 B | C2 | 1,2 | 58 Female | TCGA | 916 Dead   |
| TCGA-85- High | Low  | L-TMB+H-ICI score | -0.3134 B | C1 | 1,2 | 63 Female | TCGA | 294 Alive  |
| TCGA-85- Low  | High | H-TMB+L-ICI score | -2.208 B  | C1 | 1,2 | 62 Male   | TCGA | 1050 Alive |
| TCGA-77- Low  | Low  | L-TMB+L-ICI score | -1.1801 B | C1 | 1,2 | 68 Male   | TCGA | 2639 Dead  |
| TCGA-39- Low  | Low  | L-TMB+L-ICI score | -0.871 B  | C1 | 3,4 | 75 Male   | TCGA | 52 Dead    |
| TCGA-34- High | High | H-TMB+H-ICI score | -0.1492 B | C3 | 1,2 | 83 Female | TCGA | 1196 Alive |
| TCGA-43- Low  | Low  | L-TMB+L-ICI score | -7.0614 B | C1 | 1,2 | 76 Male   | TCGA | 116 Dead   |
| TCGA-63- High | High | H-TMB+H-ICI score | 0.59978 B | C2 | 3,4 | 65 Male   | TCGA | 1784 Alive |
| TCGA-63- High | High | H-TMB+H-ICI score | 0.20279 A | C2 | 1,2 | 68 Male   | TCGA | 1386 Alive |
| TCGA-39- Low  | Low  | L-TMB+L-ICI score | -4.4515 A | C1 | 3,4 | 81 Female | TCGA | 59 Dead    |
| TCGA-51- Low  | High | H-TMB+L-ICI score | -1.7076 B | C2 | 1,2 | 73 Female | TCGA | 12 Dead    |
| TCGA-22- High | High | H-TMB+H-ICI score | -0.0574 B | C2 | 1,2 | 74 Male   | TCGA | 1713 Dead  |
| TCGA-66- Low  | High | H-TMB+L-ICI score | -0.953 B  | C1 | 1,2 | 71 Male   | TCGA | 30 Alive   |
| TCGA-33- High | High | H-TMB+H-ICI score | 0.06955 B | C2 | 1,2 | 68 Male   | TCGA | 2419 Alive |
| TCGA-52- High | High | H-TMB+H-ICI score | 0.16592 B | C2 | 1,2 | 60 Female | TCGA | 923 Alive  |
| TCGA-77- High | High | H-TMB+H-ICI score | -0.7439 B | C2 | 1,2 | 56 Male   | TCGA | 4261 Alive |
| TCGA-66- Low  | High | H-TMB+L-ICI score | -1.1422 B | C4 | 3,4 | 70 Male   | TCGA | 1492 Alive |
| TCGA-33- High | High | H-TMB+H-ICI score | -0.7569 A | C4 | 1,2 | 40 Male   | TCGA | 5287 Dead  |
| TCGA-90- Low  | Low  | L-TMB+L-ICI score | -1.2005 B | C4 | 1,2 | 66 Female | TCGA | 289 Alive  |
| TCGA-60- High | Low  | L-TMB+H-ICI score | -0.4652 B | C3 | 1,2 | 70 Male   | TCGA | 667 Dead   |
| TCGA-56- High | High | H-TMB+H-ICI score | 0.89301 B | C1 | 1,2 | 78 Male   | TCGA | 616 Alive  |
| TCGA-85- High | High | H-TMB+H-ICI score | -0.4537 B | C3 | 1,2 | 65 Male   | TCGA | 687 Alive  |
| TCGA-60- High | Low  | L-TMB+H-ICI score | 0.50836 B | C1 | 1,2 | 73 Male   | TCGA | 983 Alive  |
| TCGA-22- High | Low  | L-TMB+H-ICI score | 0.44485 A | C1 | 1,2 | 69 Female | TCGA | 17 Dead    |
| TCGA-33- High | High | H-TMB+H-ICI score | -0.0448 B | C2 | 1,2 | 67 Male   | TCGA | 9 Alive    |
| TCGA-60- High | Low  | L-TMB+H-ICI score | 2.09585 B | C1 | 1,2 | 51 Male   | TCGA | 1075 Dead  |
| TCGA-85- High | Low  | L-TMB+H-ICI score | 0.59103 A | C2 | 1,2 | 72 Male   | TCGA | 510 Alive  |
| TCGA-58- High | High | H-TMB+H-ICI score | -0.363 A  | C2 | 1,2 | 61 Male   | TCGA | 1072 Alive |
| TCGA-37- High | Low  | L-TMB+H-ICI score | 5.22516 B | C2 | 1,2 | 52 Female | TCGA | 242 Alive  |
| TCGA-21- High | High | H-TMB+H-ICI score | -0.4789 B | C2 | 1,2 | 57 Male   | TCGA | 2134 Alive |
| TCGA-43- High | High | H-TMB+H-ICI score | 0.71101 A | C4 | 1,2 | 71 Male   | TCGA | 596 Alive  |
| TCGA-58- High | High | H-TMB+H-ICI score | 2.22083 A | C1 | 1,2 | 60 Male   | TCGA | 412 Alive  |
| TCGA-98- High | Low  | L-TMB+H-ICI score | 0.0951 A  | C2 | 1,2 | 77 Male   | TCGA | 630 Alive  |
| TCGA-85- High | High | H-TMB+H-ICI score | 0.58443 B | C2 | 1,2 | 64 Male   | TCGA | 1111 Alive |
| TCGA-34- High | High | H-TMB+H-ICI score | 0.29343 B | C2 | 1,2 | 72 Male   | TCGA | 1984 Alive |
| TCGA-34- High | High | H-TMB+H-ICI score | 0.25373 B | C2 | 1,2 | 78 Female | TCGA | 151 Dead   |
| TCGA-22- Low  | High | H-TMB+L-ICI score | -0.8965 A | C4 | 3,4 | 73 Female | TCGA | 506 Dead   |
| TCGA-98- High | Low  | L-TMB+H-ICI score | 3.8209 B  | C1 | 1,2 | 77 Female | TCGA | 822 Alive  |
| TCGA-94- High | High | H-TMB+H-ICI score | 0.69166 B | C4 | 1,2 | 73 Male   | TCGA | 810 Alive  |
| TCGA-90- High | Low  | L-TMB+H-ICI score | 1.34877 A | C1 | 1,2 | 56 Male   | TCGA | 89 Alive   |
| TCGA-96- High | Low  | L-TMB+H-ICI score | -0.5609 B | C2 | 1,2 | 67 Female | TCGA | 557 Alive  |
| TCGA-34- High | High | H-TMB+H-ICI score | 0.16876 B | C2 | 1,2 | 70 Male   | TCGA | 80 Dead    |
| TCGA-56- High | High | H-TMB+H-ICI score | -0.1239 A | C2 | 1,2 | 78 Male   | TCGA | 440 Alive  |
| TCGA-21- High | Low  | L-TMB+H-ICI score | 0.146 B   | C2 | 1,2 | 67 Male   | TCGA | 1426 Dead  |
| TCGA-22- High | Low  | L-TMB+H-ICI score | 1.07179 A | C4 | 1,2 | 66 Female | TCGA | 2170 Dead  |
| TCGA-77- High | High | H-TMB+H-ICI score | 0.49125 A | C1 | 1,2 | 81 Male   | TCGA | 1182 Alive |
| TCGA-L3- High | Low  | L-TMB+H-ICI score | 0.54416 A | C2 | 1,2 | 71 Male   | TCGA | 392 Alive  |
| TCGA-60- Low  | High | H-TMB+L-ICI score | -1.3734 A | C1 | 1,2 | 74 Female | TCGA | 1092 Alive |
| TCGA-37- High | High | H-TMB+H-ICI score | 0.84418 A | C1 | 3,4 | 51 Male   | TCGA | 122 Alive  |
| TCGA-66- High | High | H-TMB+H-ICI score | -0.2064 A | C2 | 1,2 | 63 Female | TCGA | 30 Alive   |
| TCGA-63- High | High | H-TMB+H-ICI score | -0.6304 A | C1 | 1,2 | 67 Male   | TCGA | 1602 Alive |
| TCGA-L3- High | High | H-TMB+H-ICI score | -0.3222 B | C2 | 1,2 | 45 Female | TCGA | 490 Alive  |
| TCGA-98- High | High | H-TMB+H-ICI score | 0.41348 B | C2 | 1,2 | 75 Female | TCGA | 937 Alive  |
| TCGA-77- Low  | Low  | L-TMB+L-ICI score | -0.809 B  | C2 | 1,2 | 70 Male   | TCGA | 840 Alive  |
| TCGA-66- High | High | H-TMB+H-ICI score | -0.2432 A | C4 | 1,2 | 57 Male   | TCGA | 1217 Alive |
| TCGA-77- High | Low  | L-TMB+H-ICI score | -0.4665 B | C3 | 1,2 | 74 Male   | TCGA | 539 Dead   |
| TCGA-63- High | High | H-TMB+H-ICI score | 0.0357 B  | C2 | 1,2 | 70 Female | TCGA | 2716 Alive |
| TCGA-66- High | High | H-TMB+H-ICI score | 0.33627 A | C4 | 1,2 | 57 Male   | TCGA | 61 Alive   |
| TCGA-77- High | Low  | L-TMB+H-ICI score | -0.185 B  | C2 | 1,2 | 72 Male   | TCGA | 3189 Alive |
| TCGA-43- High | High | H-TMB+H-ICI score | -0.0982 A | C2 | 3,4 | 61 Male   | TCGA | 366 Alive  |
| TCGA-22- Low  | Low  | L-TMB+L-ICI score | -5.0149 A | C1 | 1,2 | 63 Male   | TCGA | 1953 Dead  |
| TCGA-66- High | Low  | L-TMB+H-ICI score | -0.5958 B | C3 | 1,2 | 65 Male   | TCGA | 366 Dead   |
| TCGA-77- Low  | Low  | L-TMB+L-ICI score | -0.8767 B | C1 | 1,2 | 60 Male   | TCGA | 1106 Alive |
| TCGA-66- High | High | H-TMB+H-ICI score | 1.3936 A  | C3 | 1,2 | 72 Male   | TCGA | 699 Alive  |
| TCGA-98- High | High | H-TMB+H-ICI score | -0.1636 B | C4 | 1,2 | 61 Male   | TCGA | 933 Alive  |
| TCGA-58- High | High | H-TMB+H-ICI score | 1.79169 B | C2 | 3,4 | 73 Male   | TCGA | 1723 Alive |
| TCGA-O2 High  | High | H-TMB+H-ICI score | 0.98593 A | C2 | 1,2 | 78 Male   | TCGA | 1006 Dead  |
| TCGA-63- Low  | Low  | L-TMB+L-ICI score | -5.0562 B | C1 | 1,2 | 67 Female | TCGA | 2073 Alive |
| TCGA-37- High | High | H-TMB+H-ICI score | 1.45936 A | C2 | 1,2 | 68 Male   | TCGA | 207 Alive  |
| TCGA-66- High | High | H-TMB+H-ICI score | -0.5728 B | C2 | 1,2 | 55 Female | TCGA | 516 Dead   |
| TCGA-34- Low  | High | H-TMB+L-ICI score | -1.3585 B | C3 | 1,2 | 70 Male   | TCGA | 34 Dead    |
| TCGA-NC High  | High | H-TMB+H-ICI score | 0.12148 A | C2 | 1,2 | 79 Male   | TCGA | 2 Dead     |
| TCGA-56- High | High | H-TMB+H-ICI score | -0.2007 B | C2 | 1,2 | 83 Male   | TCGA | 601 Alive  |
| TCGA-18- High | High | H-TMB+H-ICI score | -0.6334 A | C1 | 1,2 | 77 Male   | TCGA | 2803 Alive |
| TCGA-56- High | Low  | L-TMB+H-ICI score | 0.07517 A | C2 | 1,2 | 84 Male   | TCGA | 925 Alive  |
| TCGA-33- High | High | H-TMB+H-ICI score | 0.58016 A | C2 | 1,2 | 57 Female | TCGA | 826 Dead   |
| TCGA-43- Low  | High | H-TMB+L-ICI score | -1.4639 A | C1 | 3,4 | 62 Female | TCGA | 1223 Alive |
| TCGA-77- Low  | High | H-TMB+L-ICI score | -1.1533 B | C1 | 3,4 | 64 Male   | TCGA | 3838 Dead  |
| TCGA-33- High | High | H-TMB+H-ICI score | -0.0129 A | C2 | 1,2 | 73 Male   | TCGA | 4601 Alive |
| TCGA-46- High | High | H-TMB+H-ICI score | 0.6554 B  | C2 | 1,2 | 81 Male   | TCGA | 423 Alive  |
| TCGA-18- High | Low  | L-TMB+H-ICI score | 0.77372 A | C2 | 3,4 | 73 Male   | TCGA | 716 Dead   |
| TCGA-63- High | High | H-TMB+H-ICI score | -0.0238 A | C2 | 1,2 | 63 Male   | TCGA | 1052 Alive |
| TCGA-56- High | High | H-TMB+H-ICI score | 0.38042 B | C2 | 1,2 | 80 Female | TCGA | 455 Alive  |
| TCGA-60- Low  | Low  | L-TMB+L-ICI score | -3.2891 A | C1 | 1,2 | 79 Female | TCGA | 274 Dead   |
| TCGA-60- High | High | H-TMB+H-ICI score | -0.0055 A | C4 | 1,2 | 62 Male   | TCGA | 311 Dead   |
| TCGA-52- High | High | H-TMB+H-ICI score | 1.65902 A | C2 | 1,2 | 74 Male   | TCGA | 166 Dead   |
| TCGA-34- High | High | H-TMB+H-ICI score | 0.47385 B | C4 | 1,2 | 75 Female | TCGA | 2471 Alive |
| TCGA-18- High | High | H-TMB+H-ICI score | -0.3588 B | C2 | 1,2 | 63 Male   | TCGA | 188 Dead   |
| TCGA-37- High | High | H-TMB+H-ICI score | 0.17877 A | C2 | 3,4 | 59 Male   | TCGA | 660 Alive  |
| TCGA-85- High | Low  | L-TMB+H-ICI score | 3.00445 A | C2 | 1,2 | 74 Female | TCGA | 482 Alive  |
| TCGA-60- High | High | H-TMB+H-ICI score | -0.7517 B | C4 | 1,2 | 60 Female | TCGA | 97 Alive   |
| TCGA-60- High | High | H-TMB+H-ICI score | -0.6386 B | C1 | 1,2 | 67 Female | TCGA | 2024 Alive |
| TCGA-94- High | High | H-TMB+H-ICI score | -0.0612 B | C2 | 1,2 | 64 Male   | TCGA | 122 Alive  |
| TCGA-22- High | High | H-TMB+H-ICI score | 0.38432 B | C3 | 1,2 | 77 Male   | TCGA | 1067 Dead  |

|               |      |                   |         |   |    |     |    |       |      |      |       |
|---------------|------|-------------------|---------|---|----|-----|----|-------|------|------|-------|
| TCGA-18- High | High | H-TMB+H-ICI score | -0.5268 | A | C2 | 1,2 | 73 | Male  | TCGA | 2811 | Alive |
| TCGA-66- High | High | H-TMB+H-ICI score | 0.94749 | B | C2 | 3,4 | 68 | Male  | TCGA | 306  | Dead  |
| TCGA-21- High | High | H-TMB+H-ICI score | 0.3664  | B | C3 | 3,4 | 71 | Male  | TCGA | 965  | Dead  |
| TCGA-92- Low  | High | H-TMB+L-ICI score | -1.1749 | A | C1 | 1,2 | 58 | Male  | TCGA | 160  | Alive |
| TCGA-63- High | Low  | L-TMB+H-ICI score | 0.38335 | A | C2 | 1,2 | 67 | Male  | TCGA | 1682 | Alive |
| TCGA-60- High | Low  | L-TMB+H-ICI score | -0.0719 | A | C4 | 1,2 | 58 | Male  | TCGA | 2820 | Alive |
| TCGA-98- High | Low  | L-TMB+H-ICI score | -0.7812 | B | C1 | 1,2 | 73 | Male  | TCGA | 652  | Alive |
| TCGA-37- High | High | H-TMB+H-ICI score | 2.49249 | B | C2 | 1,2 | 65 | Femal | TCGA | 12   | Alive |
| TCGA-22- High | Low  | L-TMB+H-ICI score | -0.1685 | A | C2 | 1,2 | 65 | Male  | TCGA | 1346 | Dead  |
| TCGA-33- High | High | H-TMB+H-ICI score | 2.90422 | B | C2 | 1,2 | 76 | Femal | TCGA | 4068 | Alive |
| TCGA-77- High | High | H-TMB+H-ICI score | -0.508  | B | C2 | 3,4 | 60 | Male  | TCGA | 1150 | Dead  |
| TCGA-56- High | Low  | L-TMB+H-ICI score | -0.1239 | B | C1 | 1,2 | 66 | Male  | TCGA | 428  | Alive |
| TCGA-56- High | High | H-TMB+H-ICI score | 0.30199 | A | C2 | 1,2 | 81 | Male  | TCGA | 4    | Alive |
| TCGA-37- High | High | H-TMB+H-ICI score | 4.2751  | A | C4 | 1,2 | 56 | Male  | TCGA | 247  | Alive |
| TCGA-58- High | Low  | L-TMB+H-ICI score | 0.32016 | A | C2 | 1,2 | 64 | Male  | TCGA | 2589 | Alive |
| TCGA-43- High | High | H-TMB+H-ICI score | 0.52838 | B | C2 | 1,2 | 70 | Male  | TCGA | 699  | Alive |
| TCGA-77- High | High | H-TMB+H-ICI score | 0.353   | A | C2 | 3,4 | 66 | Male  | TCGA | 678  | Dead  |
| TCGA-39- High | High | H-TMB+H-ICI score | -0.7682 | B | C4 | 1,2 | 76 | Femal | TCGA | 1841 | Alive |
| TCGA-90- High | High | H-TMB+H-ICI score | 0.29603 | A | C4 | 1,2 | 61 | Femal | TCGA | 322  | Alive |
| TCGA-68- High | High | H-TMB+H-ICI score | -0.5567 | A | C2 | 1,2 | 60 | Femal | TCGA | 83   | Alive |
| TCGA-66- High | High | H-TMB+H-ICI score | 0.52135 | A | C1 | 3,4 | 62 | Male  | TCGA | 61   | Alive |
| TCGA-66- High | High | H-TMB+H-ICI score | -0.1088 | B | C4 | 1,2 | 60 | Male  | TCGA | 578  | Alive |
| TCGA-85- High | High | H-TMB+H-ICI score | 0.11718 | B | C1 | 1,2 | 59 | Male  | TCGA | 1259 | Alive |
| TCGA-56- High | High | H-TMB+H-ICI score | -0.6863 | B | C2 | 1,2 | 73 | Femal | TCGA | 106  | Alive |
| TCGA-56- High | High | H-TMB+H-ICI score | 0.94873 | B | C2 | 1,2 | 79 | Male  | TCGA | 608  | Alive |
| TCGA-18- High | High | H-TMB+H-ICI score | 0.64346 | A | C4 | 1,2 | 65 | Male  | TCGA | 2645 | Alive |
| TCGA-51- High | High | H-TMB+H-ICI score | 0.34998 | A | C2 | 1,2 | 72 | Femal | TCGA | 1856 | Dead  |
| TCGA-NC High  | High | H-TMB+H-ICI score | 0.98637 | A | C4 | 1,2 | 73 | Male  | TCGA | 88   | Dead  |
| TCGA-77- High | Low  | L-TMB+H-ICI score | 0.18847 | A | C4 | 3,4 | 75 | Male  | TCGA | 4026 | Alive |
| TCGA-96- High | Low  | L-TMB+H-ICI score | 0.11201 | A | C1 | 1,2 | 73 | Male  | TCGA | 1736 | Alive |
| TCGA-NC High  | High | H-TMB+H-ICI score | 0.47549 | A | C2 | 1,2 | 76 | Male  | TCGA | 1212 | Alive |
| TCGA-33- Low  | Low  | L-TMB+L-ICI score | -0.8497 | A | C4 | 1,2 | 62 | Femal | TCGA | 47   | Dead  |
| TCGA-85- High | High | H-TMB+H-ICI score | 0.03306 | B | C2 | 1,2 | 67 | Male  | TCGA | 600  | Alive |
| TCGA-60- High | Low  | L-TMB+H-ICI score | -0.4365 | A | C2 | 1,2 | 64 | Femal | TCGA | 1260 | Alive |
| TCGA-33- High | High | H-TMB+H-ICI score | -0.2343 | A | C2 | 1,2 | 68 | Male  | TCGA | 3924 | Alive |
| TCGA-NC High  | High | H-TMB+H-ICI score | 3.22818 | A | C4 | 1,2 | 59 | Male  | TCGA | 418  | Dead  |
| TCGA-21- High | High | H-TMB+H-ICI score | -0.0814 | A | C4 | 3,4 | 65 | Male  | TCGA | 329  | Dead  |
| TCGA-85- High | Low  | L-TMB+H-ICI score | 0.43025 | B | C2 | 1,2 | 66 | Male  | TCGA | 468  | Alive |
| TCGA-34- High | High | H-TMB+H-ICI score | -0.3012 | B | C3 | 1,2 | 73 | Femal | TCGA | 1541 | Alive |
| TCGA-77- Low  | High | H-TMB+L-ICI score | -0.8082 | A | C2 | 3,4 | 68 | Male  | TCGA | 2023 | Alive |
| TCGA-56- High | High | H-TMB+H-ICI score | 1.41832 | B | C2 | 1,2 | 59 | Male  | TCGA | 302  | Alive |
| TCGA-33- High | High | H-TMB+H-ICI score | -0.6904 | B | C2 | 1,2 | 60 | Male  | TCGA | 143  | Dead  |
| TCGA-39- High | High | H-TMB+H-ICI score | -0.0711 | A | C2 | 1,2 | 73 | Male  | TCGA | 3108 | Alive |
| TCGA-56- High | Low  | L-TMB+H-ICI score | -0.5568 | B | C1 | 1,2 | 76 | Femal | TCGA | 41   | Alive |
| TCGA-56- High | High | H-TMB+H-ICI score | 1.27486 | A | C1 | 1,2 | 71 | Male  | TCGA | 692  | Alive |
| TCGA-77- High | High | H-TMB+H-ICI score | -0.1594 | B | C2 | 1,2 | 69 | Male  | TCGA | 708  | Dead  |
| TCGA-85- High | High | H-TMB+H-ICI score | 0.83906 | A | C2 | 1,2 | 57 | Male  | TCGA | 493  | Alive |
| TCGA-77- High | High | H-TMB+H-ICI score | 0.15204 | B | C2 | 1,2 | 70 | Male  | TCGA | 833  | Alive |
| TCGA-85- High | High | H-TMB+H-ICI score | 0.35037 | B | C2 | 1,2 | 63 | Male  | TCGA | 377  | Alive |
| TCGA-XC High  | Low  | L-TMB+H-ICI score | -0.0355 | B | C4 | 1,2 | 77 | Femal | TCGA | 6    | Dead  |
| TCGA-66- High | High | H-TMB+H-ICI score | 0.4994  | A | C1 | 1,2 | 71 | Male  | TCGA | 365  | Dead  |
| TCGA-68- High | High | H-TMB+H-ICI score | 0.721   | B | C1 | 3,4 | 73 | Femal | TCGA | 492  | Alive |
| TCGA-77- High | Low  | L-TMB+H-ICI score | 0.91597 | B | C2 | 1,2 | 63 | Male  | TCGA | 180  | Dead  |
| TCGA-90- High | High | H-TMB+H-ICI score | 2.12303 | A | C1 | 1,2 | 53 | Male  | TCGA | 688  | Alive |
| TCGA-98- High | High | H-TMB+H-ICI score | 0.16393 | A | C1 | 3,4 | 70 | Male  | TCGA | 649  | Alive |
| TCGA-34- High | Low  | L-TMB+H-ICI score | -0.0202 | B | C2 | 1,2 | 71 | Femal | TCGA | 804  | Alive |
| TCGA-56- Low  | Low  | L-TMB+L-ICI score | -2.3735 | B | C1 | 1,2 | 74 | Male  | TCGA | 378  | Alive |
| TCGA-66- High | High | H-TMB+H-ICI score | 0.24773 | B | C4 | 1,2 | 68 | Femal | TCGA | 790  | Alive |
| TCGA-39- High | High | H-TMB+H-ICI score | -0.3773 | B | C2 | 1,2 | 65 | Male  | TCGA | 1690 | Alive |
| TCGA-56- Low  | High | H-TMB+L-ICI score | -0.9813 | B | C1 | 1,2 | 77 | Femal | TCGA | 666  | Alive |
| TCGA-NK High  | High | H-TMB+H-ICI score | 1.45232 | A | C2 | 1,2 | 70 | Male  | TCGA | 1997 | Alive |
| TCGA-22- High | High | H-TMB+H-ICI score | 1.41622 | B | C1 | 1,2 | 65 | Male  | TCGA | 822  | Dead  |
| TCGA-39- High | High | H-TMB+H-ICI score | -0.0427 | A | C4 | 1,2 | 44 | Male  | TCGA | 3850 | Alive |
| TCGA-63- High | High | H-TMB+H-ICI score | 0.24391 | A | C1 | 1,2 | 69 | Femal | TCGA | 456  | Dead  |
| TCGA-33- High | High | H-TMB+H-ICI score | -0.2853 | A | C2 | 3,4 | 66 | Male  | TCGA | 2979 | Dead  |
| TCGA-63- High | High | H-TMB+H-ICI score | 0.40281 | B | C1 | 1,2 | 74 | Male  | TCGA | 498  | Alive |
| TCGA-18- High | High | H-TMB+H-ICI score | 1.32099 | A | C4 | 1,2 | 83 | Male  | TCGA | 973  | Alive |
| TCGA-66- High | High | H-TMB+H-ICI score | -0.4252 | B | C2 | 1,2 | 69 | Male  | TCGA | 31   | Alive |
| TCGA-63- High | High | H-TMB+H-ICI score | 0.38364 | A | C4 | 1,2 | 67 | Male  | TCGA | 2133 | Alive |
| TCGA-56- Low  | High | H-TMB+L-ICI score | -1.2661 | B | C2 | 1,2 | 79 | Male  | TCGA | 517  | Alive |
| TCGA-18- High | Low  | L-TMB+H-ICI score | -0.489  | A | C2 | 1,2 | 77 | Femal | TCGA | 2304 | Alive |
| TCGA-NK High  | Low  | L-TMB+H-ICI score | 1.66043 | B | C2 | 1,2 | 57 | Male  | TCGA | 511  | Alive |
| TCGA-85- High | High | H-TMB+H-ICI score | -0.5015 | B | C2 | 3,4 | 57 | Male  | TCGA | 195  | Alive |
| TCGA-22- Low  | High | H-TMB+L-ICI score | -1.6324 | A | C4 | 1,2 | 73 | Femal | TCGA | 1161 | Dead  |
| TCGA-56- High | High | H-TMB+H-ICI score | -0.4899 | A | C4 | 1,2 | 76 | Femal | TCGA | 570  | Alive |
| TCGA-56- Low  | High | H-TMB+L-ICI score | -1.4834 | B | C1 | 1,2 | 66 | Femal | TCGA | 3    | Alive |
| TCGA-92- Low  | Low  | L-TMB+L-ICI score | -0.822  | B | C3 | 1,2 | 71 | Male  | TCGA | 106  | Alive |
| TCGA-85- Low  | High | H-TMB+L-ICI score | -1.556  | B | C1 | 3,4 | 72 | Male  | TCGA | 94   | Alive |
| TCGA-85- High | High | H-TMB+H-ICI score | 0.53781 | A | C2 | 1,2 | 68 | Male  | TCGA | 927  | Alive |
| TCGA-77- High | High | H-TMB+H-ICI score | 0.43614 | A | C4 | 1,2 | 79 | Male  | TCGA | 899  | Dead  |
| TCGA-22- High | High | H-TMB+H-ICI score | -0.5772 | A | C1 | 3,4 | 57 | Male  | TCGA | 734  | Dead  |
| TCGA-33- High | High | H-TMB+H-ICI score | 1.631   | B | C2 | 1,2 | 63 | Femal | TCGA | 1656 | Dead  |
| TCGA-56- High | High | H-TMB+H-ICI score | 1.28795 | A | C2 | 1,2 | 55 | Male  | TCGA | 585  | Alive |
| TCGA-21- High | High | H-TMB+H-ICI score | 0.11865 | B | C1 | 1,2 | 54 | Femal | TCGA | 1852 | Alive |
| TCGA-6A High  | High | H-TMB+H-ICI score | 0.79843 | A | C2 | 1,2 | 73 | Femal | TCGA | 0    | Dead  |
| TCGA-63- High | Low  | L-TMB+H-ICI score | 0.40744 | B | C2 | 1,2 | 67 | Femal | TCGA | 0    | Alive |
| TCGA-39- Low  | Low  | L-TMB+L-ICI score | -3.3198 | B | C1 | 1,2 | 76 | Male  | TCGA | 1679 | Dead  |
| TCGA-43- High | High | H-TMB+H-ICI score | -0.3362 | A | C3 | 1,2 | 85 | Male  | TCGA | 166  | Dead  |
| TCGA-98- High | Low  | L-TMB+H-ICI score | -0.3541 | B | C3 | 3,4 | 56 | Femal | TCGA | 84   | Dead  |
| TCGA-77- High | High | H-TMB+H-ICI score | 0.17912 | B | C2 | 1,2 | 64 | Male  | TCGA | 15   | Alive |
| TCGA-92- High | High | H-TMB+H-ICI score | -0.2529 | B | C1 | 1,2 | 45 | Femal | TCGA | 82   | Alive |
| TCGA-56- Low  | High | H-TMB+L-ICI score | -0.917  | B | C3 | 1,2 | 68 | Male  | TCGA | 55   | Alive |
| TCGA-70- Low  | High | H-TMB+L-ICI score | -0.8535 | B | C1 | 3,4 | 47 | Male  | TCGA | 367  | Alive |
| TCGA-43- Low  | Low  | L-TMB+L-ICI score | -3.7196 | B | C4 | 1,2 | 76 | Femal | TCGA | 432  | Alive |
| TCGA-66- High | High | H-TMB+H-ICI score | -0.3396 | A | C1 | 1,2 | 79 | Male  | TCGA | 700  | Alive |
| TCGA-85- High | High | H-TMB+H-ICI score | 0.72172 | A | C2 | 1,2 | 59 | Femal | TCGA | 42   | Alive |
| TCGA-58- Low  | Low  | L-TMB+L-ICI score | -1.9507 | B | C4 | 1,2 | 60 | Male  | TCGA | 403  | Dead  |
| TCGA-85- High | High | H-TMB+H-ICI score | 1.30518 | A | C2 | 3,4 | 67 | Male  | TCGA | 161  | Alive |

|               |      |                   |           |    |     |          |      |            |
|---------------|------|-------------------|-----------|----|-----|----------|------|------------|
| TCGA-21- Low  | High | H-TMB+L-ICI score | -0.9383 A | C2 | 1,2 | 64 Male  | TCGA | 1032 Alive |
| TCGA-33- High | High | H-TMB+H-ICI score | 0.00757 A | C2 | 1,2 | 65 Femal | TCGA | 1344 Dead  |
| TCGA-56- High | High | H-TMB+H-ICI score | 0.33879 B | C1 | 3,4 | 66 Femal | TCGA | 315 Alive  |
| TCGA-34- High | High | H-TMB+H-ICI score | 0.45895 A | C2 | 1,2 | 76 Femal | TCGA | 1874 Dead  |
| TCGA-60- High | High | H-TMB+H-ICI score | 1.69595 A | C2 | 1,2 | 56 Male  | TCGA | 358 Dead   |
| TCGA-77- High | High | H-TMB+H-ICI score | -0.51 B   | C2 | 1,2 | 77 Femal | TCGA | 1992 Alive |
| TCGA-66- High | High | H-TMB+H-ICI score | -0.7683 B | C1 | 3,4 | 66 Male  | TCGA | 153 Dead   |
| TCGA-68- High | Low  | L-TMB+H-ICI score | -0.5574 B | C2 | 3,4 | 84 Male  | TCGA | 202 Alive  |
| TCGA-94- High | Low  | L-TMB+H-ICI score | 0.02345 B | C2 | 1,2 | 73 Male  | TCGA | 5 Dead     |
| TCGA-56- High | High | H-TMB+H-ICI score | 0.78742 B | C2 | 1,2 | 72 Femal | TCGA | 8 Alive    |
| TCGA-22- Low  | High | H-TMB+L-ICI score | -1.4481 A | C4 | 1,2 | 73 Femal | TCGA | 358 Dead   |
| TCGA-77- High | High | H-TMB+H-ICI score | -0.0033 B | C3 | 1,2 | 69 Male  | TCGA | 4765 Alive |
| TCGA-21- High | High | H-TMB+H-ICI score | 0.18013 A | C2 | 1,2 | 66 Male  | TCGA | 3724 Alive |
| TCGA-98- High | High | H-TMB+H-ICI score | -0.0848 A | C4 | 1,2 | 64 Male  | TCGA | 565 Alive  |
| TCGA-34- Low  | Low  | L-TMB+L-ICI score | -1.0752 B | C3 | 1,2 | 60 Male  | TCGA | 276 Dead   |
| TCGA-21- High | High | H-TMB+H-ICI score | 12.5014 B | C2 | 1,2 | 68 Femal | TCGA | 962 Dead   |
| TCGA-60- High | High | H-TMB+H-ICI score | 0.19911 B | C3 | 1,2 | 64 Femal | TCGA | 2447 Alive |
| TCGA-96- Low  | High | H-TMB+L-ICI score | -0.8015 A | C2 | 1,2 | 65 Male  | TCGA | 589 Alive  |
| TCGA-66- Low  | High | H-TMB+L-ICI score | -1.5136 A | C1 | 1,2 | 56 Male  | TCGA | 699 Alive  |
| TCGA-56- High | Low  | L-TMB+H-ICI score | 1.43424 A | C2 | 1,2 | 84 Male  | TCGA | 420 Alive  |
| TCGA-22- High | High | H-TMB+H-ICI score | -0.5409 B | C2 | 1,2 | 78 Male  | TCGA | 1933 Dead  |
| TCGA-21- High | Low  | L-TMB+H-ICI score | 0.68245 B | C2 | 1,2 | 77 Male  | TCGA | 979 Alive  |
| TCGA-85- Low  | Low  | L-TMB+L-ICI score | -1.9472 B | C1 | 1,2 | 57 Male  | TCGA | 579 Alive  |
| TCGA-21- High | High | H-TMB+H-ICI score | 0.95576 B | C2 | 1,2 | 76 Male  | TCGA | 2680 Dead  |
| TCGA-46- Low  | High | H-TMB+L-ICI score | -1.526 B  | C2 | 1,2 | 59 Femal | TCGA | 405 Alive  |
| TCGA-39- Low  | Low  | L-TMB+L-ICI score | -1.311 B  | C4 | 1,2 | 70 Male  | TCGA | 2086 Dead  |
| TCGA-90- Low  | High | H-TMB+L-ICI score | -1.0205 B | C1 | 1,2 | 64 Male  | TCGA | 758 Alive  |
| TCGA-39- High | High | H-TMB+H-ICI score | -0.7657 B | C4 | 1,2 | 70 Femal | TCGA | 4053 Alive |
| TCGA-39- High | Low  | L-TMB+H-ICI score | -0.3183 B | C2 | 1,2 | 70 Male  | TCGA | 3387 Alive |
| TCGA-98- High | High | H-TMB+H-ICI score | -0.1028 B | C2 | 1,2 | 63 Male  | TCGA | 173 Alive  |
| TCGA-66- Low  | Low  | L-TMB+L-ICI score | -0.8836 A | C2 | 1,2 | 67 Male  | TCGA | 121 Alive  |
| TCGA-37- High | High | H-TMB+H-ICI score | 0.21442 A | C2 | 3,4 | 64 Male  | TCGA | 103 Alive  |
| TCGA-56- Low  | Low  | L-TMB+L-ICI score | -1.6131 B | C1 | 1,2 | 74 Male  | TCGA | 397 Alive  |
| TCGA-63- High | High | H-TMB+H-ICI score | 0.60759 B | C2 | 1,2 | 62 Male  | TCGA | 3123 Alive |
| TCGA-60- High | High | H-TMB+H-ICI score | -0.1688 A | C2 | 1,2 | 66 Male  | TCGA | 908 Alive  |
| TCGA-85- High | Low  | L-TMB+H-ICI score | 0.70518 B | C1 | 1,2 | 62 Male  | TCGA | 765 Alive  |
| TCGA-56- High | High | H-TMB+H-ICI score | 1.34681 B | C2 | 3,4 | 66 Male  | TCGA | 442 Alive  |
| TCGA-43- High | High | H-TMB+H-ICI score | -0.0926 B | C1 | 1,2 | 72 Femal | TCGA | 407 Alive  |
| TCGA-18- High | High | H-TMB+H-ICI score | -0.6872 B | C2 | 1,2 | 57 Male  | TCGA | 1519 Alive |
| TCGA-77- High | High | H-TMB+H-ICI score | -0.1891 B | C3 | 1,2 | 65 Male  | TCGA | 3253 Dead  |
| TCGA-60- High | High | H-TMB+H-ICI score | 0.02262 A | C2 | 1,2 | 83 Femal | TCGA | 1297 Alive |
| TCGA-22- High | High | H-TMB+H-ICI score | 0.16148 B | C3 | 1,2 | 79 Male  | TCGA | 24 Dead    |
| TCGA-66- High | High | H-TMB+H-ICI score | 0.3684 A  | C2 | 1,2 | 65 Femal | TCGA | 1338 Alive |
| TCGA-18- High | High | H-TMB+H-ICI score | -0.3917 A | C1 | 1,2 | 67 Male  | TCGA | 371 Dead   |
| TCGA-77- High | Low  | L-TMB+H-ICI score | -0.6167 B | C1 | 1,2 | 90 Male  | TCGA | 0 Dead     |
| TCGA-21- High | High | H-TMB+H-ICI score | -0.1952 A | C4 | 3,4 | 60 Femal | TCGA | 3636 Alive |
| TCGA-43- High | High | H-TMB+H-ICI score | 2.11877 A | C4 | 1,2 | 67 Femal | TCGA | 296 Alive  |
| TCGA-85- High | Low  | L-TMB+H-ICI score | -0.1316 B | C3 | 1,2 | 48 Male  | TCGA | 952 Alive  |
| TCGA-85- Low  | High | H-TMB+L-ICI score | -0.8902 B | C3 | 1,2 | 50 Male  | TCGA | 35 Alive   |
| TCGA-NC High  | High | H-TMB+H-ICI score | 0.23407 B | C2 | 3,4 | 69 Male  | TCGA | 804 Alive  |
| TCGA-58- High | High | H-TMB+H-ICI score | 1.08689 A | C4 | 1,2 | 68 Femal | TCGA | 1058 Alive |
| TCGA-66- High | High | H-TMB+H-ICI score | -0.0418 B | C1 | 1,2 | 72 Male  | TCGA | 61 Alive   |
| TCGA-LA- High | Low  | L-TMB+H-ICI score | 1.10944 B | C2 | 3,4 | 71 Male  | TCGA | 408 Alive  |
| TCGA-77- High | Low  | L-TMB+H-ICI score | -0.2522 B | C1 | 1,2 | 68 Male  | TCGA | 198 Dead   |
| TCGA-85- High | High | H-TMB+H-ICI score | -0.3251 A | C2 | 1,2 | 53 Male  | TCGA | 995 Alive  |
| TCGA-22- Low  | Low  | L-TMB+L-ICI score | -2.0872 A | C4 | 1,2 | 74 Male  | TCGA | 445 Dead   |
| TCGA-77- High | High | H-TMB+H-ICI score | -0.2587 A | C2 | 1,2 | 69 Femal | TCGA | 632 Dead   |
| TCGA-22- High | High | H-TMB+H-ICI score | 0.01761 B | C2 | 3,4 | 73 Femal | TCGA | 1057 Dead  |
| TCGA-66- High | High | H-TMB+H-ICI score | -0.2994 A | C4 | 3,4 | 64 Male  | TCGA | 1645 Alive |
| TCGA-22- High | High | H-TMB+H-ICI score | 0.63158 A | C2 | 1,2 | 62 Male  | TCGA | 1485 Dead  |
| TCGA-77- High | Low  | L-TMB+H-ICI score | -0.1276 B | C2 | 1,2 | 76 Male  | TCGA | 1280 Alive |
| TCGA-56- High | High | H-TMB+H-ICI score | 0.30311 B | C2 | 1,2 | 60 Male  | TCGA | 562 Alive  |
| TCGA-85- High | High | H-TMB+H-ICI score | -0.6905 A | C1 | 3,4 | 73 Male  | TCGA | 1001 Alive |
| TCGA-66- High | High | H-TMB+H-ICI score | -0.6977 A | C4 | 1,2 | 71 Male  | TCGA | 639 Alive  |
| TCGA-85- High | High | H-TMB+H-ICI score | 3.38559 A | C1 | 1,2 | 46 Male  | TCGA | 576 Alive  |
| TCGA-39- High | High | H-TMB+H-ICI score | -0.7515 B | C3 | 1,2 | 73 Femal | TCGA | 1107 Dead  |
| TCGA-85- High | Low  | L-TMB+H-ICI score | -0.6457 B | C2 | 1,2 | 53 Male  | TCGA | 734 Alive  |
| TCGA-43- High | Low  | L-TMB+H-ICI score | 0.06661 B | C2 | 1,2 | 52 Male  | TCGA | 1190 Alive |
| TCGA-NK High  | Low  | L-TMB+H-ICI score | -0.2506 A | C2 | 1,2 | 73 Male  | TCGA | 111 Alive  |
| TCGA-39- Low  | Low  | L-TMB+L-ICI score | -0.9224 A | C4 | 1,2 | 72 Femal | TCGA | 2080 Alive |
| TCGA-43- High | Low  | L-TMB+H-ICI score | -0.5703 B | C1 | 1,2 | 69 Femal | TCGA | 757 Alive  |
| TCGA-18- Low  | Low  | L-TMB+L-ICI score | -1.5888 B | C3 | 1,2 | 64 Male  | TCGA | 85 Dead    |
| TCGA-NC High  | High | H-TMB+H-ICI score | 0.2996 A  | C2 | 3,4 | 74 Male  | TCGA | 138 Dead   |
| TCGA-39- Low  | Low  | L-TMB+L-ICI score | -0.8604 A | C4 | 3,4 | 67 Male  | TCGA | 740 Dead   |
| TCGA-43- High | High | H-TMB+H-ICI score | -0.5911 A | C4 | 1,2 | 78 Male  | TCGA | 559 Alive  |
| TCGA-22- High | High | H-TMB+H-ICI score | -0.3795 B | C2 | 1,2 | 80 Femal | TCGA | 429 Dead   |
| TCGA-34- High | High | H-TMB+H-ICI score | -0.1319 A | C1 | 3,4 | 62 Femal | TCGA | 1180 Alive |
| TCGA-60- Low  | Low  | L-TMB+L-ICI score | -3.2629 B | C1 | 1,2 | 69 Male  | TCGA | 1505 Alive |
| TCGA-85- High | High | H-TMB+H-ICI score | 0.50802 B | C2 | 1,2 | 46 Male  | TCGA | 465 Alive  |
| TCGA-NC High  | High | H-TMB+H-ICI score | 0.632 A   | C2 | 1,2 | 68 Femal | TCGA | 1743 Alive |
| TCGA-18- High | High | H-TMB+H-ICI score | 0.54158 B | C1 | 1,2 | 74 Male  | TCGA | 3747 Alive |
| TCGA-56- High | High | H-TMB+H-ICI score | 1.10083 A | C4 | 1,2 | 55 Femal | TCGA | 818 Alive  |
| TCGA-85- High | High | H-TMB+H-ICI score | 0.7273 B  | C3 | 1,2 | 70 Male  | TCGA | 402 Alive  |
| TCGA-18- High | High | H-TMB+H-ICI score | 2.17495 A | C4 | 1,2 | 81 Male  | TCGA | 146 Dead   |
| TCGA-22- Low  | Low  | L-TMB+L-ICI score | -2.3024 B | C1 | 1,2 | 76 Male  | TCGA | 454 Dead   |
| TCGA-66- High | Low  | L-TMB+H-ICI score | -0.2786 A | C4 | 3,4 | 68 Femal | TCGA | 578 Alive  |
| TCGA-34- High | High | H-TMB+H-ICI score | 0.62373 A | C1 | 3,4 | 75 Male  | TCGA | 1834 Alive |
| TCGA-34- High | High | H-TMB+H-ICI score | -0.0619 B | C2 | 3,4 | 67 Male  | TCGA | 123 Dead   |
| TCGA-66- High | Low  | L-TMB+H-ICI score | -0.523 A  | C4 | 1,2 | 64 Male  | TCGA | 61 Alive   |
| TCGA-85- High | High | H-TMB+H-ICI score | -0.6967 A | C2 | 3,4 | 70 Male  | TCGA | 307 Alive  |
| TCGA-92- High | High | H-TMB+H-ICI score | -0.4992 A | C4 | 1,2 | 74 Femal | TCGA | 70 Alive   |
| TCGA-46- Low  | High | H-TMB+L-ICI score | -2.2234 B | C1 | 1,2 | 62 Femal | TCGA | 370 Alive  |
| TCGA-77- Low  | Low  | L-TMB+L-ICI score | -2.4316 A | C1 | 1,2 | 72 Male  | TCGA | 383 Dead   |
| TCGA-94- High | High | H-TMB+H-ICI score | -0.2255 B | C2 | 1,2 | 61 Male  | TCGA | 491 Alive  |
| TCGA-18- Low  | Low  | L-TMB+L-ICI score | -1.4283 B | C3 | 1,2 | 72 Male  | TCGA | 136 Dead   |
| TCGA-77- Low  | High | H-TMB+L-ICI score | -1.6228 B | C2 | 1,2 | 72 Male  | TCGA | 3166 Alive |
| TCGA-21- High | Low  | L-TMB+H-ICI score | 1.06673 A | C2 | 1,2 | 77 Male  | TCGA | 474 Dead   |
| TCGA-18- Low  | High | H-TMB+L-ICI score | -1.6212 A | C2 | 3,4 | 63 Femal | TCGA | 3576 Alive |

|               |      |                   |           |    |     |          |      |            |
|---------------|------|-------------------|-----------|----|-----|----------|------|------------|
| TCGA-66- High | High | H-TMB+H-ICI score | -0.1397 B | C2 | 3,4 | 70 Male  | TCGA | 641 Alive  |
| TCGA-56- High | High | H-TMB+H-ICI score | 0.34449 B | C2 | 1,2 | 58 Male  | TCGA | 881 Dead   |
| TCGA-77- High | High | H-TMB+H-ICI score | 0.24346 A | C2 | 1,2 | 63 Male  | TCGA | 4570 Alive |
| TCGA-22- High | Low  | L-TMB+H-ICI score | -0.5119 B | C2 | 1,2 | 81 Male  | TCGA | 357 Dead   |
| TCGA-NK High  | Low  | L-TMB+H-ICI score | 0.27315 A | C2 | 3,4 | 66 Male  | TCGA | 13 Alive   |
| TCGA-22- Low  | High | H-TMB+L-ICI score | -2.5396 B | C1 | 1,2 | 64 Male  | TCGA | 1912 Dead  |
| TCGA-O2 High  | Low  | L-TMB+H-ICI score | 0.56683 A | C2 | 1,2 | 63 Male  | TCGA | 261 Dead   |
| TCGA-52- High | High | H-TMB+H-ICI score | 0.04172 A | C4 | 1,2 | 68 Male  | TCGA | 835 Dead   |
| TCGA-46- High | High | H-TMB+H-ICI score | -0.184 B  | C2 | 1,2 | 71 Male  | TCGA | 324 Alive  |
| TCGA-58- High | High | H-TMB+H-ICI score | -0.1013 B | C2 | 3,4 | 57 Femal | TCGA | 2167 Alive |
| TCGA-85- High | Low  | L-TMB+H-ICI score | 0.20795 B | C2 | 1,2 | 47 Male  | TCGA | 826 Alive  |
| TCGA-18- High | High | H-TMB+H-ICI score | -0.7378 B | C3 | 3,4 | 65 Male  | TCGA | 1097 Alive |
| TCGA-60- High | High | H-TMB+H-ICI score | 0.06185 B | C3 | 3,4 | 47 Male  | TCGA | 717 Alive  |
| TCGA-94- High | High | H-TMB+H-ICI score | -0.1052 B | C2 | 1,2 | 62 Male  | TCGA | 538 Alive  |
| TCGA-43- High | High | H-TMB+H-ICI score | -0.1273 B | C2 | 1,2 | 73 Male  | TCGA | 358 Alive  |
| TCGA-34- High | Low  | L-TMB+H-ICI score | 0.63726 A | C1 | 1,2 | 79 Male  | TCGA | 515 Alive  |
| TCGA-77- High | Low  | L-TMB+H-ICI score | -0.7455 B | C3 | 1,2 | 64 Male  | TCGA | 5 Dead     |
| TCGA-56- High | High | H-TMB+H-ICI score | 0.25474 B | C2 | 1,2 | 75 Male  | TCGA | 532 Alive  |
| TCGA-85- High | High | H-TMB+H-ICI score | -0.2184 B | C3 | 1,2 | 84 Male  | TCGA | 604 Alive  |
| TCGA-66- High | Low  | L-TMB+H-ICI score | -0.2521 B | C2 | 1,2 | 58 Male  | TCGA | 913 Alive  |
| TCGA-98- High | High | H-TMB+H-ICI score | 0.3531 A  | C2 | 1,2 | 70 Male  | TCGA | 552 Alive  |
| TCGA-22- Low  | High | H-TMB+L-ICI score | -3.4668 B | C1 | 3,4 | 60 Femal | TCGA | 1470 Dead  |
| TCGA-58- High | High | H-TMB+H-ICI score | -0.0557 A | C1 | 3,4 | 75 Male  | TCGA | 1 Dead     |
| TCGA-22- High | High | H-TMB+H-ICI score | -0.5907 A | C2 | 1,2 | 72 Femal | TCGA | 2409 Dead  |
| TCGA-66- High | High | H-TMB+H-ICI score | 2.05383 A | C2 | 3,4 | 67 Male  | TCGA | 61 Alive   |
| TCGA-21- High | High | H-TMB+H-ICI score | 0.01745 A | C4 | 1,2 | 61 Male  | TCGA | 3644 Alive |
| TCGA-58- High | Low  | L-TMB+H-ICI score | -0.3007 B | C2 | 1,2 | 70 Male  | TCGA | 501 Dead   |
| TCGA-60- High | High | H-TMB+H-ICI score | -0.4783 B | C1 | 1,2 | 64 Male  | TCGA | 1731 Alive |
| TCGA-22- Low  | High | H-TMB+L-ICI score | -1.0845 B | C2 | 1,2 | 64 Male  | TCGA | 2625 Alive |
| TCGA-37- High | High | H-TMB+H-ICI score | -0.3602 A | C2 | 3,4 | 63 Male  | TCGA | 238 Alive  |
| TCGA-63- High | High | H-TMB+H-ICI score | -0.4483 A | C2 | 1,2 | 48 Male  | TCGA | 0 Dead     |
| TCGA-66- High | High | H-TMB+H-ICI score | -0.7608 A | C1 | 3,4 | 75 Male  | TCGA | 215 Dead   |
| TCGA-LA- High | High | H-TMB+H-ICI score | -0.1563 A | C2 | 1,2 | 68 Male  | TCGA | 401 Alive  |
| TCGA-66- High | High | H-TMB+H-ICI score | -0.623 A  | C4 | 3,4 | 66 Male  | TCGA | 762 Alive  |
| TCGA-22- Low  | High | H-TMB+L-ICI score | -2.0586 B | C1 | 1,2 | 81 Male  | TCGA | 291 Dead   |
| TCGA-66- High | High | H-TMB+H-ICI score | -0.113 A  | C4 | 1,2 | 69 Male  | TCGA | 92 Dead    |
| TCGA-66- High | High | H-TMB+H-ICI score | -0.2162 B | C1 | 1,2 | 63 Male  | TCGA | 28 Alive   |
| TCGA-77- High | Low  | L-TMB+H-ICI score | -0.2808 A | C2 | 3,4 | 64 Male  | TCGA | 1655 Dead  |
| TCGA-37- High | High | H-TMB+H-ICI score | 0.6784 A  | C2 | 1,2 | 53 Male  | TCGA | 1143 Alive |
| TCGA-77- High | Low  | L-TMB+H-ICI score | -0.1033 B | C2 | 1,2 | 68 Male  | TCGA | 1695 Alive |
| TCGA-33- High | High | H-TMB+H-ICI score | -0.0967 B | C2 | 1,2 | 59 Femal | TCGA | 1114 Dead  |
| TCGA-58- High | High | H-TMB+H-ICI score | -0.2024 A | C2 | 1,2 | 52 Male  | TCGA | 910 Alive  |
| TCGA-33- High | High | H-TMB+H-ICI score | -0.0358 B | C2 | 1,2 | 83 Male  | TCGA | 2249 Dead  |
| TCGA-63- High | High | H-TMB+H-ICI score | 0.48889 B | C1 | 1,2 | 78 Male  | TCGA | 2381 Alive |
| TCGA-43- High | High | H-TMB+H-ICI score | -0.3283 B | C2 | 1,2 | 66 Male  | TCGA | 353 Alive  |
| TCGA-43- High | High | H-TMB+H-ICI score | -0.3221 B | C2 | 1,2 | 59 Femal | TCGA | 653 Alive  |
| TCGA-22- High | Low  | L-TMB+H-ICI score | 0.04231 B | C2 | 1,2 | 75 Male  | TCGA | 587 Dead   |
| TCGA-58- High | Low  | L-TMB+H-ICI score | 0.04899 A | C2 | 3,4 | 59 Male  | TCGA | 1045 Dead  |
| TCGA-77- High | High | H-TMB+H-ICI score | 1.03213 A | C4 | 1,2 | 58 Male  | TCGA | 990 Alive  |
| TCGA-18- Low  | High | H-TMB+L-ICI score | -1.8989 B | C1 | 1,2 | 74 Male  | TCGA | 4694 Alive |
| TCGA-85- High | High | H-TMB+H-ICI score | 0.07552 A | C4 | 1,2 | 65 Male  | TCGA | 921 Alive  |
| TCGA-22- Low  | High | H-TMB+L-ICI score | -1.2318 B | C1 | 1,2 | 73 Male  | TCGA | 399 Dead   |
| TCGA-56- High | High | H-TMB+H-ICI score | -0.3689 B | C2 | 1,2 | 73 Male  | TCGA | 198 Alive  |
| TCGA-39- High | Low  | L-TMB+H-ICI score | -0.2239 A | C3 | 1,2 | 76 Male  | TCGA | 544 Dead   |
| TCGA-J1- Low  | High | H-TMB+L-ICI score | -1.5999 B | C2 | 1,2 | 70 Male  | TCGA | 581 Alive  |
| TCGA-92- High | High | H-TMB+H-ICI score | -0.2234 A | C2 | 3,4 | 52 Male  | TCGA | 122 Alive  |
| TCGA-46- High | High | H-TMB+H-ICI score | -0.5806 A | C1 | 1,2 | 57 Male  | TCGA | 135 Alive  |
| TCGA-43- High | High | H-TMB+H-ICI score | 0.0668 B  | C2 | 1,2 | 55 Femal | TCGA | 89 Dead    |
| TCGA-NC High  | High | H-TMB+H-ICI score | 0.91726 A | C2 | 3,4 | 70 Femal | TCGA | 1336 Alive |
| TCGA-22- High | Low  | L-TMB+H-ICI score | -0.7634 B | C1 | 1,2 | 78 Femal | TCGA | 974 Dead   |
| TCGA-60- Low  | High | H-TMB+L-ICI score | -1.245 A  | C4 | 1,2 | 66 Femal | TCGA | 1531 Alive |
| TCGA-33- High | High | H-TMB+H-ICI score | 0.16256 B | C2 | 3,4 | 80 Male  | TCGA | 1927 Alive |
| TCGA-63- High | Low  | L-TMB+H-ICI score | 1.58834 B | C1 | 1,2 | 69 Male  | TCGA | 1100 Alive |
| TCGA-85- High | High | H-TMB+H-ICI score | -0.6947 B | C3 | 1,2 | 56 Femal | TCGA | 1038 Alive |
| TCGA-NC High  | High | H-TMB+H-ICI score | 0.97354 A | C2 | 1,2 | 58 Femal | TCGA | 128 Alive  |
| TCGA-43- High | High | H-TMB+H-ICI score | 2.04207 B | C1 | 1,2 | 71 Male  | TCGA | 1007 Alive |
| TCGA-21- High | High | H-TMB+H-ICI score | -0.2388 A | C2 | 1,2 | 75 Male  | TCGA | 3016 Alive |
| TCGA-98- High | High | H-TMB+H-ICI score | 1.64198 B | C2 | 1,2 | 69 Male  | TCGA | 61 Dead    |
| TCGA-85- High | Low  | L-TMB+H-ICI score | -0.1122 A | C2 | 1,2 | 60 Male  | TCGA | 932 Alive  |
| TCGA-68- High | High | H-TMB+H-ICI score | 1.03185 A | C2 | 1,2 | 74 Femal | TCGA | 448 Alive  |
| TCGA-66- High | High | H-TMB+H-ICI score | -0.278 B  | C2 | 3,4 | 54 Male  | TCGA | 31 Alive   |
| TCGA-NC High  | High | H-TMB+H-ICI score | 0.83484 A | C2 | 1,2 | 75 Femal | TCGA | 1244 Alive |
| TCGA-NC High  | High | H-TMB+H-ICI score | 2.082 A   | C4 | 1,2 | 60 Male  | TCGA | 2336 Alive |
| TCGA-98- High | High | H-TMB+H-ICI score | 2.7239 B  | C1 | 1,2 | 68 Male  | TCGA | 645 Alive  |
| TCGA-66- Low  | High | H-TMB+L-ICI score | -1.6518 B | C2 | 3,4 | 67 Male  | TCGA | 759 Alive  |
| TCGA-77- High | Low  | L-TMB+H-ICI score | 0.24802 B | C2 | 1,2 | 67 Male  | TCGA | 340 Dead   |
| TCGA-56- High | High | H-TMB+H-ICI score | 0.36051 B | C2 | 1,2 | 63 Male  | TCGA | 481 Alive  |
| TCGA-79- High | High | H-TMB+H-ICI score | -0.4087 B | C2 | 3,4 | 67 Male  | TCGA | 0 Alive    |
| TCGA-63- High | High | H-TMB+H-ICI score | -0.1611 B | C3 | 1,2 | 54 Male  | TCGA | 1824 Alive |
| TCGA-56- Low  | High | H-TMB+L-ICI score | -1.9323 B | C1 | 1,2 | 67 Male  | TCGA | 0 Alive    |
| TCGA-51- High | High | H-TMB+H-ICI score | 0.21641 B | C2 | 1,2 | 55 Male  | TCGA | 911 Alive  |
| TCGA-34- High | High | H-TMB+H-ICI score | 1.51635 A | C2 | 1,2 | 70 Femal | TCGA | 1361 Alive |
| TCGA-85- High | High | H-TMB+H-ICI score | 0.15708 B | C3 | 1,2 | 49 Male  | TCGA | 1160 Alive |
| TCGA-77- High | High | H-TMB+H-ICI score | 0.26803 B | C2 | 1,2 | 67 Male  | TCGA | 1841 Alive |
| TCGA-77- High | High | H-TMB+H-ICI score | 0.76426 A | C2 | 3,4 | 74 Male  | TCGA | 2284 Dead  |
| TCGA-85- High | High | H-TMB+H-ICI score | -0.0731 A | C2 | 1,2 | 52 Femal | TCGA | 1113 Alive |
| TCGA-56- High | Low  | L-TMB+H-ICI score | 0.90845 A | C1 | 1,2 | 75 Femal | TCGA | 640 Alive  |
| TCGA-21- High | High | H-TMB+H-ICI score | 1.05567 B | C2 | 1,2 | 75 Male  | TCGA | 1315 Dead  |
| TCGA-46- High | Low  | L-TMB+H-ICI score | 0.01736 A | C1 | 1,2 | 76 Male  | TCGA | 396 Alive  |
| TCGA-56- High | Low  | L-TMB+H-ICI score | -0.4151 A | C2 | 1,2 | 69 Male  | TCGA | 555 Alive  |
| TCGA-68- High | High | H-TMB+H-ICI score | 0.04515 B | C3 | 1,2 | 74 Male  | TCGA | 211 Alive  |
| TCGA-56- High | High | H-TMB+H-ICI score | 1.50135 B | C4 | 3,4 | 67 Male  | TCGA | 637 Alive  |
| TCGA-18- High | Low  | L-TMB+H-ICI score | -0.3029 A | C2 | 1,2 | 52 Male  | TCGA | 345 Dead   |
| TCGA-37- High | High | H-TMB+H-ICI score | -0.6077 A | C4 | 3,4 | 61 Femal | TCGA | 227 Alive  |
| TCGA-22- High | High | H-TMB+H-ICI score | 0.03492 B | C3 | 1,2 | 74 Male  | TCGA | 573 Dead   |
| TCGA-85- High | High | H-TMB+H-ICI score | 0.2221 B  | C2 | 1,2 | 74 Male  | TCGA | 942 Alive  |
| TCGA-60- High | Low  | L-TMB+H-ICI score | -0.0763 B | C1 | 1,2 | 74 Male  | TCGA | 816 Alive  |
| TCGA-77- High | High | H-TMB+H-ICI score | -0.0658 A | C2 | 1,2 | 75 Male  | TCGA | 1423 Dead  |

|               |      |                   |           |    |     |           |           |             |
|---------------|------|-------------------|-----------|----|-----|-----------|-----------|-------------|
| TCGA-33- High | High | H-TMB+H-ICI score | 0.09179 B | C2 | 1,2 | 60 Male   | TCGA      | 3600 Dead   |
| TCGA-43- High | Low  | L-TMB+H-ICI score | -0.3925 B | C2 | 1,2 | 68 Femal  | TCGA      | 236 Alive   |
| TCGA-22- High | High | H-TMB+H-ICI score | 1.19022 B | C2 | 1,2 | 70 Male   | TCGA      | 671 Alive   |
| TCGA-90- High | High | H-TMB+H-ICI score | -0.3304 B | C2 | 1,2 | 55 Male   | TCGA      | 358 Alive   |
| TCGA-21- Low  | High | H-TMB+L-ICI score | -1.4828 B | C2 | 1,2 | 64 Male   | TCGA      | 1058 Dead   |
| TCGA-NC High  | High | H-TMB+H-ICI score | 1.5306 A  | C2 | 3,4 | 70 Male   | TCGA      | 448 Dead    |
| TCGA-60- High | High | H-TMB+H-ICI score | -0.6876 A | C4 | 1,2 | 76 Femal  | TCGA      | 109 Dead    |
| TCGA-22- High | High | H-TMB+H-ICI score | 0.03327 A | C2 | 3,4 | 80 Male   | TCGA      | 623 Dead    |
| TCGA-77- High | Low  | L-TMB+H-ICI score | 0.28225 A | C2 | 3,4 | 76 Male   | TCGA      | 803 Dead    |
| TCGA-NK High  | High | H-TMB+H-ICI score | -0.5511 B | C2 | 1,2 | 77 Male   | TCGA      | 2542 Alive  |
| TCGA-56- High | High | H-TMB+H-ICI score | 0.24435 B | C2 | 1,2 | 58 Femal  | TCGA      | 1011 Alive  |
| TCGA-63- Low  | Low  | L-TMB+L-ICI score | -2.4732 A | C1 | 1,2 | 78 Femal  | TCGA      | 345 Dead    |
| TCGA-52- High | High | H-TMB+H-ICI score | -0.6236 B | C4 | 1,2 | 62 Femal  | TCGA      | 862 Alive   |
| GSM442070     |      |                   |           | C1 | 1,2 | 64 Femal  | GSE17710  | 150.8008215 |
| GSM442071     |      |                   |           | C1 | 1,2 | 61 Male   | GSE17710  | 172.4845995 |
| GSM442072     |      |                   |           | C1 | 1,2 | 61 Femal  | GSE17710  | 666.2833677 |
| GSM442073     |      |                   |           | C1 | 1,2 | 80 Femal  | GSE17710  | 119.2607802 |
| GSM442074     |      |                   |           | C1 | 1,2 | 68 Femal  | GSE17710  | 151.7864475 |
| GSM442075     |      |                   |           | C1 | 1,2 | 61 Male   | GSE17710  | 41.396304   |
| GSM442076     |      |                   |           | C1 | 1,2 | 59 Femal  | GSE17710  | 371.5811088 |
| GSM442077     |      |                   |           | C1 | 1,2 | 57 Femal  | GSE17710  | 1.9712526   |
| GSM442078     |      |                   |           | C1 | 1,2 | 73 Femal  | GSE17710  | 1609.527721 |
| GSM442079     |      |                   |           | C1 | 1,2 | 74 Male   | GSE17710  | 2527.145791 |
| GSM442080     |      |                   |           | C1 | 1,2 | 53 Male   | GSE17710  | 112.3613964 |
| GSM442081     |      |                   |           | C1 | 1,2 | 68 Femal  | GSE17710  | 1114.743326 |
| GSM442082     |      |                   |           | C1 | 1,2 | 69 Femal  | GSE17710  | 1321.724846 |
| GSM442083     |      |                   |           | C1 | 1,2 | 76 Femal  | GSE17710  | 594.332649  |
| GSM442084     |      |                   |           | C1 | 1,2 | 63 Male   | GSE17710  | 488.8706367 |
| GSM442085     |      |                   |           | C1 | 1,2 | 55 Male   | GSE17710  | 3429.979466 |
| GSM442086     |      |                   |           | C1 | 1,2 | 49 Femal  | GSE17710  | 532.238193  |
| GSM442087     |      |                   |           | C1 | 1,2 | 81 Male   | GSE17710  | 1277.371663 |
| GSM442088     |      |                   |           | C1 | 3,4 | 82 Male   | GSE17710  | 825.9548256 |
| GSM442089     |      |                   |           | C1 | 1,2 | 61 Femal  | GSE17710  | 1008.295688 |
| GSM442090     |      |                   |           | C1 | 1,2 | 73 Male   | GSE17710  | 12.8131416  |
| GSM442091     |      |                   |           | C1 | 1,2 | 65 Femal  | GSE17710  | 931.4168379 |
| GSM442092     |      |                   |           | C1 | 1,2 | 61 Femal  | GSE17710  | 447.4743327 |
| GSM442093     |      |                   |           | C1 | 1,2 | 53 Male   | GSE17710  | 653.4702258 |
| GSM442094     |      |                   |           | C1 | 1,2 | 76 Male   | GSE17710  | 94.6201233  |
| GSM442095     |      |                   |           | C1 | 1,2 | 83 Femal  | GSE17710  | 702.7515399 |
| GSM442096     |      |                   |           | C1 | 1,2 | 85 Male   | GSE17710  | 2441.396304 |
| GSM442097     |      |                   |           | C1 | 1,2 | 42 Femal  | GSE17710  | 231.6221766 |
| GSM442098     |      |                   |           | C3 | 1,2 | 62 Male   | GSE17710  | 1162.053388 |
| GSM442099     |      |                   |           | C1 | 1,2 | 78 Male   | GSE17710  | 18.7268994  |
| GSM442100     |      |                   |           | C1 | 1,2 | 58 Femal  | GSE17710  | 647.5564683 |
| GSM442101     |      |                   |           | C1 | 1,2 | 81 Male   | GSE17710  | 764.8459959 |
| GSM442102     |      |                   |           | C1 | 1,2 | 79 Male   | GSE17710  | 9.8562627   |
| GSM442103     |      |                   |           | C1 | 1,2 | 73 Femal  | GSE17710  | 1829.322382 |
| GSM442104     |      |                   |           | C1 | 1,2 | 50 Femal  | GSE17710  | 1766.2423   |
| GSM442105     |      |                   |           | C1 | 1,2 | 65 Male   | GSE17710  | 803.285421  |
| GSM442106     |      |                   |           | C1 | 1,2 | 67 Male   | GSE17710  | 411.9917865 |
| GSM442107     |      |                   |           | C1 | 1,2 | 81 Femal  | GSE17710  | 1477.453799 |
| GSM442108     |      |                   |           | C1 | 1,2 | 73 Male   | GSE17710  | 1543.49076  |
| GSM442109     |      |                   |           | C1 | 1,2 | 80 Male   | GSE17710  | 729.3634497 |
| GSM442110     |      |                   |           | C1 | 1,2 | 49 Male   | GSE17710  | 882.1355235 |
| GSM442111     |      |                   |           | C1 | 1,2 | 75 Femal  | GSE17710  | 834.825462  |
| GSM442112     |      |                   |           | C1 | 1,2 | 59 Male   | GSE17710  | 405.0924024 |
| GSM442113     |      |                   |           | C1 | 1,2 | 73 Male   | GSE17710  | 1049.691992 |
| GSM442114     |      |                   |           | C1 | 1,2 | 67 Male   | GSE17710  | 509.5687884 |
| GSM442115     |      |                   |           | C1 | 1,2 | 67 Femal  | GSE17710  | 24.6406572  |
| GSM442116     |      |                   |           | C1 | 1,2 | 52 Male   | GSE17710  | 799.3429158 |
| GSM442117     |      |                   |           | C1 | 1,2 | 41 Femal  | GSE17710  | 481.9712526 |
| GSM442118     |      |                   |           | C1 | 1,2 | 70 Male   | GSE17710  | 466.2012321 |
| GSM442119     |      |                   |           | C1 | 3,4 | 68 Male   | GSE17710  | 899.8767966 |
| GSM442120     |      |                   |           | C1 | 1,2 | 78 Femal  | GSE17710  | 822.0123204 |
| GSM442121     |      |                   |           | C1 | 1,2 | 70 Male   | GSE17710  | 487.8850104 |
| GSM442122     |      |                   |           | C1 | 1,2 | 70 Male   | GSE17710  | 4.9281315   |
| GSM442123     |      |                   |           | C1 | 1,2 | 66 Male   | GSE17710  | 373.5523614 |
| GSM442124     |      |                   |           | C3 | 3,4 | 67 Male   | GSE17710  | 691.9096509 |
| GSM442125     |      |                   |           | C1 | 1,2 | 63 Male   | GSE17710  | 630.8008215 |
| GSM4750621    |      |                   |           | C1 |     | 63 Male   | GSE157010 | 1259.506849 |
| GSM4750622    |      |                   |           | C1 | 1   | 78 Male   | GSE157010 | 993.2054795 |
| GSM4750623    |      |                   |           | C3 | 0   | 68 Male   | GSE157010 | 2071.232877 |
| GSM4750624    |      |                   |           | C3 | 0   | 71 Female | GSE157010 | 2836.60274  |
| GSM4750625    |      |                   |           | C3 | 1   | 83 Male   | GSE157010 | 452.7123288 |
| GSM4750626    |      |                   |           | C4 | 1   | 63 Female | GSE157010 | 835.3972603 |
| GSM4750627    |      |                   |           | C3 | 0   | 73 Male   | GSE157010 | 1945.972603 |
| GSM4750628    |      |                   |           | C2 | 1   | 71 Male   | GSE157010 | 234.739726  |
| GSM4750629    |      |                   |           | C3 | 1   | 60 Male   | GSE157010 | 690.4109589 |
| GSM4750630    |      |                   |           | C3 | 0   | 76 Female | GSE157010 | 1045.479452 |
| GSM4750631    |      |                   |           | C2 | 1   | 72 Male   | GSE157010 | 581.9178082 |
| GSM4750632    |      |                   |           | C1 | 0   | 78 Male   | GSE157010 | 1919.342466 |
| GSM4750633    |      |                   |           | C2 | 1   | 72 Male   | GSE157010 | 982.3561644 |
| GSM4750634    |      |                   |           | C1 | 1   | 71 Female | GSE157010 | 1091.835616 |
| GSM4750635    |      |                   |           | C3 | 1   | 68 Female | GSE157010 | 671.6712329 |
| GSM4750636    |      |                   |           | C2 | 0   | 59 Male   | GSE157010 | 1880.876712 |
| GSM4750637    |      |                   |           | C2 | 0   | 83 Female | GSE157010 | 1959.780822 |
| GSM4750638    |      |                   |           | C1 | 1   | 57 Female | GSE157010 | 323.5068493 |
| GSM4750639    |      |                   |           | C4 | 1   | 52 Male   | GSE157010 | 1534.684932 |
| GSM4750640    |      |                   |           | C1 | 1   | 66 Male   | GSE157010 | 226.8493151 |
| GSM4750641    |      |                   |           | C2 | 0   | 55 Female | GSE157010 | 238.6849315 |
| GSM4750642    |      |                   |           | C1 | 0   | 79 Male   | GSE157010 | 2388.821918 |
| GSM4750643    |      |                   |           | C1 | 0   | 62 Female | GSE157010 | 1802.958904 |
| GSM4750644    |      |                   |           | C2 | 0   | 51 Female | GSE157010 | 1843.39726  |
| GSM4750645    |      |                   |           | C3 | 1   | 81 Female | GSE157010 | 967.5616438 |
| GSM4750646    |      |                   |           | C1 | 0   | 75 Male   | GSE157010 | 1820.712329 |
| GSM4750647    |      |                   |           | C2 | 1   | 59 Male   | GSE157010 | 1609.643836 |
| GSM4750648    |      |                   |           | C2 | 0   | 62 Male   | GSE157010 | 1868.054795 |
| GSM4750649    |      |                   |           | C1 | 0   | 74 Male   | GSE157010 | 2327.671233 |

|            |    |   |           |           |             |
|------------|----|---|-----------|-----------|-------------|
| GSM4750650 | C1 | 1 | 79 Male   | GSE157010 | 966.5753425 |
| GSM4750651 | C3 | 0 | 64 Female | GSE157010 | 1815.780822 |
| GSM4750652 | C3 | 1 | 55 Female | GSE157010 | 258.4109589 |
| GSM4750653 | C2 | 0 | 72 Female | GSE157010 | 2216.219178 |
| GSM4750654 | C1 | 1 | 72 Male   | GSE157010 | 176.5479452 |
| GSM4750655 | C2 | 1 | 70 Male   | GSE157010 | 962.630137  |
| GSM4750656 | C1 | 1 | 84 Female | GSE157010 | 836.3835616 |
| GSM4750657 | C1 | 1 | 81 Female | GSE157010 | 691.3972603 |
| GSM4750658 | C3 | 0 | 66 Male   | GSE157010 | 2113.643836 |
| GSM4750659 | C4 | 0 | 68 Female | GSE157010 | 1935.123288 |
| GSM4750660 | C4 | 0 | 63 Male   | GSE157010 | 1830.575342 |
| GSM4750661 | C2 | 0 | 73 Male   | GSE157010 | 1835.506849 |
| GSM4750662 | C1 | 0 | 79 Male   | GSE157010 | 1808.876712 |
| GSM4750663 | C1 | 0 | 61 Male   | GSE157010 | 1151.013699 |
| GSM4750664 | C1 | 1 | 54 Male   | GSE157010 | 1389.69863  |
| GSM4750665 | C1 | 1 | 66 Female | GSE157010 | 1596.821918 |
| GSM4750666 | C1 | 1 | 74 Female | GSE157010 | 1670.794521 |
| GSM4750667 | C1 | 0 | 81 Male   | GSE157010 | 1996.273973 |
| GSM4750668 | C1 | 1 | 61 Male   | GSE157010 | 1670.794521 |
| GSM4750669 | C2 | 1 | 75 Male   | GSE157010 | 280.109589  |
| GSM4750670 | C2 | 1 | 64 Female | GSE157010 | 160.7671233 |
| GSM4750671 | C1 | 1 | 83 Male   | GSE157010 | 788.0547945 |
| GSM4750672 | C2 | 1 | 60 Male   | GSE157010 | 308.7123288 |
| GSM4750673 | C1 | 0 | 58 Male   | GSE157010 | 1010.958904 |
| GSM4750674 | C1 | 0 | 66 Female | GSE157010 | 1743.780822 |
| GSM4750675 | C1 | 0 | 64 Female | GSE157010 | 1805.917808 |
| GSM4750676 | C1 | 0 | 59 Male   | GSE157010 | 1639.232877 |
| GSM4750677 | C1 | 1 | 57 Female | GSE157010 | 1216.109589 |
| GSM4750678 | C2 | 0 | 74 Male   | GSE157010 | 1513.972603 |
| GSM4750679 | C2 | 1 | 64 Male   | GSE157010 | 839.3424658 |
| GSM4750680 | C4 | 1 | 62 Female | GSE157010 | 1746.739726 |
| GSM4750681 | C2 | 0 | 66 Male   | GSE157010 | 4.931506849 |
| GSM4750682 | C1 | 0 | 71 Male   | GSE157010 | 1999.232877 |
| GSM4750683 | C2 | 1 | 66 Male   | GSE157010 | 751.5616438 |
| GSM4750684 | C1 | 1 | 79 Male   | GSE157010 | 775.2328767 |
| GSM4750685 | C3 | 0 | 57 Female | GSE157010 | 1668.821918 |
| GSM4750686 | C4 | 0 | 64 Male   | GSE157010 | 964.6027397 |
| GSM4750687 | C2 | 1 | 88 Male   | GSE157010 | 1030.684932 |
| GSM4750688 | C1 | 0 | 70 Female | GSE157010 | 1852.273973 |
| GSM4750689 | C2 | 1 | 63 Male   | GSE157010 | 237.6986301 |
| GSM4750690 | C2 | 0 | 79 Female | GSE157010 | 1886.794521 |
| GSM4750691 | C4 | 0 | 71 Male   | GSE157010 | 2344.438356 |
| GSM4750692 | C1 | 1 | 72 Female | GSE157010 | 1387.726027 |
| GSM4750693 | C3 | 1 | 62 Male   | GSE157010 | 843.2876712 |
| GSM4750694 | C2 | 1 | 55 Male   | GSE157010 | 228.8219178 |
| GSM4750695 | C1 | 1 | 68 Male   | GSE157010 | 1424.219178 |
| GSM4750696 | C2 | 0 | 72 Male   | GSE157010 | 203.1780822 |
| GSM4750697 | C1 | 1 | 76 Male   | GSE157010 | 119.3424658 |
| GSM4750698 | C1 | 1 | 63 Male   | GSE157010 | 295.890411  |
| GSM4750699 | C1 | 1 | 81 Male   | GSE157010 | 947.8356164 |
| GSM4750700 | C1 | 0 | 72 Male   | GSE157010 | 2070.246575 |
| GSM4750701 | C1 | 1 | 78 Female | GSE157010 | 1325.589041 |
| GSM4750702 | C2 | 1 | 67 Male   | GSE157010 | 1370.958904 |
| GSM4750703 | C1 | 0 | 63 Male   | GSE157010 | 1855.232877 |
| GSM4750704 | C2 | 0 | 67 Male   | GSE157010 | 1944        |
| GSM4750705 | C1 | 1 | 64 Female | GSE157010 | 2016        |
| GSM4750706 | C2 | 0 | 61 Female | GSE157010 | 1857.205479 |
| GSM4750707 | C2 | 0 | 79 Male   | GSE157010 | 2037.69863  |
| GSM4750708 | C1 | 1 | 82 Male   | GSE157010 | 1902.575342 |
| GSM4750709 | C1 | 1 | 65 Male   | GSE157010 | 498.0821918 |
| GSM4750710 | C3 | 1 | 64 Male   | GSE157010 | 382.6849315 |
| GSM4750711 | C1 | 0 | 69 Male   | GSE157010 | 2079.123288 |
| GSM4750712 | C1 | 1 | 64 Female | GSE157010 | 1368.986301 |
| GSM4750713 | C1 | 1 | 82 Female | GSE157010 | 975.4520548 |
| GSM4750714 | C3 | 1 | 69 Male   | GSE157010 | 1477.479452 |
| GSM4750715 | C1 | 1 | 52 Female | GSE157010 | 2160.986301 |
| GSM4750716 | C2 | 0 | 73 Male   | GSE157010 | 1886.794521 |
| GSM4750717 | C1 | 0 | 89 Female | GSE157010 | 2106.739726 |
| GSM4750718 | C2 | 1 | 80 Male   | GSE157010 | 1424.219178 |
| GSM4750719 | C1 | 1 | 70 Male   | GSE157010 | 635.1780822 |
| GSM4750720 | C4 | 0 | 79 Male   | GSE157010 | 2084.054795 |
| GSM4750721 | C1 | 1 | 77 Female | GSE157010 | 2714.30137  |
| GSM4750722 | C1 | 0 | 69 Male   | GSE157010 | 1823.671233 |
| GSM4750723 | C1 | 0 | 65 Male   | GSE157010 | 2164.931507 |
| GSM4750724 | C1 | 0 | 73 Male   | GSE157010 | 2040.657534 |
| GSM4750725 | C1 | 0 | 54 Male   | GSE157010 | 3062.465753 |
| GSM4750726 | C1 | 1 | 61 Male   | GSE157010 | 1739.835616 |
| GSM4750727 | C1 | 1 | 61 Female | GSE157010 | 532.6027397 |
| GSM4750728 | C1 | 1 | 71 Male   | GSE157010 | 1423.232877 |
| GSM4750729 | C2 | 0 | 48 Female | GSE157010 | 2160.986301 |
| GSM4750730 | C1 | 1 | 78 Female | GSE157010 | 976.4383562 |
| GSM4750731 | C3 | 0 | 80 Male   | GSE157010 | 2385.863014 |
| GSM4750732 | C2 | 0 | 60 Female | GSE157010 | 2002.191781 |
| GSM4750733 | C1 | 0 | 79 Female | GSE157010 | 1871.013699 |
| GSM4750734 | C2 | 0 | 59 Male   | GSE157010 | 1851.287671 |
| GSM4750735 | C1 | 1 | 82 Female | GSE157010 | 485.260274  |
| GSM4750736 | C1 | 1 | 84 Male   | GSE157010 | 1430.136986 |
| GSM4750737 | C1 | 0 | 68 Female | GSE157010 | 2539.726027 |
| GSM4750738 | C1 | 0 | 63 Male   | GSE157010 | 1853.260274 |
| GSM4750739 | C2 | 0 | 69 Male   | GSE157010 | 1832.547945 |
| GSM4750740 | C1 | 0 | 65 Male   | GSE157010 | 1995.287671 |
| GSM4750741 | C1 | 0 | 63 Male   | GSE157010 | 2003.178082 |
| GSM4750742 | C1 | 0 | 51 Male   | GSE157010 | 2065.315068 |
| GSM4750743 | C1 | 0 | 64 Male   | GSE157010 | 2029.808219 |
| GSM4750744 | C1 | 1 | 72 Male   | GSE157010 | 1339.39726  |
| GSM4750745 | C2 | 1 | 73 Male   | GSE157010 | 169.6438356 |
| GSM4750746 | C1 | 1 | 60 Male   | GSE157010 | 1552.438356 |
| GSM4750747 | C3 | 0 | 72 Female | GSE157010 | 1832.547945 |

|            |    |   |           |           |             |
|------------|----|---|-----------|-----------|-------------|
| GSM4750748 | C1 | 1 | 76 Male   | GSE157010 | 734.7945205 |
| GSM4750749 | C4 | 0 | 63 Female | GSE157010 | 2130.410959 |
| GSM4750750 | C1 | 1 | 84 Male   | GSE157010 | 137.0958904 |
| GSM4750751 | C1 | 0 | 63 Female | GSE157010 | 1996.273973 |
| GSM4750752 | C2 | 1 | 65 Male   | GSE157010 | 878.7945205 |
| GSM4750753 | C1 | 0 | 75 Male   | GSE157010 | 1924.273973 |
| GSM4750754 | C1 | 1 | 61 Male   | GSE157010 | 622.3561644 |
| GSM4750755 | C2 | 0 | 67 Male   | GSE157010 | 2069.260274 |
| GSM4750756 | C1 | 0 | 74 Male   | GSE157010 | 1140.164384 |
| GSM4750757 | C1 | 0 | 71 Female | GSE157010 | 1967.671233 |
| GSM4750758 | C1 | 1 | 65 Male   | GSE157010 | 1812.821918 |
| GSM4750759 | C1 | 0 | 79 Female | GSE157010 | 1863.123288 |
| GSM4750760 | C1 | 1 | 80 Male   | GSE157010 | 1949.917808 |
| GSM4750761 | C3 | 1 | 78 Male   | GSE157010 | 292.9315068 |
| GSM4750762 | C2 | 0 | 66 Male   | GSE157010 | 1823.671233 |
| GSM4750763 | C1 | 1 | 82 Female | GSE157010 | 595.7260274 |
| GSM4750764 | C2 | 0 | 65 Female | GSE157010 | 1921.315068 |
| GSM4750765 | C1 | 0 | 78 Male   | GSE157010 | 1671.780822 |
| GSM4750766 | C4 | 1 | 70 Male   | GSE157010 | 804.8219178 |
| GSM4750767 | C2 | 1 | 59 Male   | GSE157010 | 911.3424658 |
| GSM4750768 | C1 | 0 | 85 Female | GSE157010 | 2611.726027 |
| GSM4750769 | C3 | 0 | 65 Female | GSE157010 | 1178.630137 |
| GSM4750770 | C2 | 1 | 74 Female | GSE157010 | 1533.69863  |
| GSM4750771 | C4 | 1 | 76 Female | GSE157010 | 1876.931507 |
| GSM4750772 | C1 | 1 | 74 Male   | GSE157010 | 1570.191781 |
| GSM4750773 | C2 | 1 | 61 Female | GSE157010 | 466.5205479 |
| GSM4750774 | C1 | 1 | 64 Female | GSE157010 | 254.4657534 |
| GSM4750775 | C3 | 1 | 64 Male   | GSE157010 | 221.9178082 |
| GSM4750776 | C4 | 0 | 56 Male   | GSE157010 | 1820.712329 |
| GSM4750777 | C1 | 0 | 70 Male   | GSE157010 | 1895.671233 |
| GSM4750778 | C3 | 1 | 59 Female | GSE157010 | 413.260274  |
| GSM4750779 | C2 | 0 | 73 Female | GSE157010 | 1998.246575 |
| GSM4750780 | C1 | 0 | 69 Male   | GSE157010 | 353.0958904 |
| GSM4750781 | C1 | 0 | 71 Female | GSE157010 | 1825.643836 |
| GSM4750782 | C2 | 0 | 68 Male   | GSE157010 | 1915.39726  |
| GSM4750783 | C1 | 0 | 61 Male   | GSE157010 | 1810.849315 |
| GSM4750784 | C1 | 0 | 71 Male   | GSE157010 | 1859.178082 |
| GSM4750785 | C1 | 1 | 78 Male   | GSE157010 | 143.0136986 |
| GSM4750786 | C3 | 0 | 73 Male   | GSE157010 | 1924.273973 |
| GSM4750787 | C1 | 1 | 59 Male   | GSE157010 | 1530.739726 |
| GSM4750788 | C1 | 1 | 65 Male   | GSE157010 | 306.739726  |
| GSM4750789 | C3 | 1 | 62 Female | GSE157010 | 780.1643836 |
| GSM4750790 | C1 | 1 | 76 Male   | GSE157010 | 541.4794521 |
| GSM4750791 | C1 | 1 | 68 Male   | GSE157010 | 1288.109589 |
| GSM4750792 | C1 | 0 | 69 Female | GSE157010 | 1483.39726  |
| GSM4750793 | C1 | 1 | 73 Male   | GSE157010 | 360         |
| GSM4750794 | C3 | 1 | 79 Male   | GSE157010 | 864         |
| GSM4750795 | C1 | 0 | 68 Female | GSE157010 | 2577.205479 |
| GSM4750796 | C1 | 0 | 72 Female | GSE157010 | 2730.082192 |
| GSM4750797 | C2 | 1 | 59 Male   | GSE157010 | 663.7808219 |
| GSM4750798 | C1 | 0 | 73 Female | GSE157010 | 1835.506849 |
| GSM4750799 | C2 | 1 | 53 Male   | GSE157010 | 1182.575342 |
| GSM4750800 | C1 | 1 | 60 Male   | GSE157010 | 1396.60274  |
| GSM4750801 | C1 | 1 | 81 Male   | GSE157010 | 518.7945205 |
| GSM4750802 | C3 | 1 | 61 Male   | GSE157010 | 106.5205479 |
| GSM4750803 | C2 | 0 | 65 Male   | GSE157010 | 2007.123288 |
| GSM4750804 | C1 | 0 | 68 Female | GSE157010 | 1670.794521 |
| GSM4750805 | C1 | 1 | 68 Male   | GSE157010 | 245.5890411 |
| GSM4750806 | C1 | 0 | 71 Male   | GSE157010 | 1940.054795 |
| GSM4750807 | C2 | 1 | 55 Female | GSE157010 | 256.4383562 |
| GSM4750808 | C2 | 1 | 63 Male   | GSE157010 | 441.8630137 |
| GSM4750809 | C1 | 1 | 65 Male   | GSE157010 | 383.6712329 |
| GSM4750810 | C1 | 1 | 66 Male   | GSE157010 | 564.1643836 |
| GSM4750811 | C4 | 0 | 59 Male   | GSE157010 | 1864.109589 |
| GSM4750812 | C1 | 1 | 65 Male   | GSE157010 | 1246.684932 |
| GSM4750813 | C1 | 0 | 65 Female | GSE157010 | 1870.027397 |
| GSM4750814 | C1 | 0 | 55 Male   | GSE157010 | 393.5342466 |
| GSM4750815 | C1 | 1 | 64 Male   | GSE157010 | 811.7260274 |
| GSM4750816 | C2 | 1 | 70 Female | GSE157010 | 932.0547945 |
| GSM4750817 | C2 | 0 | 46 Male   | GSE157010 | 2138.30137  |
| GSM4750818 | C1 | 1 | 67 Male   | GSE157010 | 841.3150685 |
| GSM4750819 | C2 | 0 | 73 Male   | GSE157010 | 1831.561644 |
| GSM4750820 | C1 | 0 | 71 Male   | GSE157010 | 2071.232877 |
| GSM4750821 | C2 | 0 | 55 Male   | GSE157010 | 1907.506849 |
| GSM4750822 | C1 | 1 | 86 Female | GSE157010 | 209.0958904 |
| GSM4750823 | C1 | 0 | 70 Female | GSE157010 | 2120.547945 |
| GSM4750824 | C3 | 1 | 75 Male   | GSE157010 | 707.1780822 |
| GSM4750825 | C3 | 1 | 68 Female | GSE157010 | 1615.561644 |
| GSM4750826 | C3 | 0 | 73 Male   | GSE157010 | 1836.493151 |
| GSM4750827 | C2 | 0 | 48 Male   | GSE157010 | 1840.438356 |
| GSM4750828 | C1 | 1 | 66 Female | GSE157010 | 139.0684932 |
| GSM4750829 | C1 | 0 | 73 Male   | GSE157010 | 1831.561644 |
| GSM4750830 | C2 | 0 | 71 Female | GSE157010 | 1923.287671 |
| GSM4750831 | C1 | 0 | 61 Male   | GSE157010 | 1820.712329 |
| GSM4750832 | C1 | 1 | 81 Female | GSE157010 | 423.1232877 |
| GSM4750833 | C2 | 0 | 70 Male   | GSE157010 | 2036.712329 |
| GSM4750834 | C1 | 0 | 70 Female | GSE157010 | 2057.424658 |
| GSM4750835 | C1 | 1 | 71 Male   | GSE157010 | 1449.863014 |
| GSM4750836 | C1 | 0 | 82 Male   | GSE157010 | 1850.30137  |
| GSM4750837 | C1 | 0 | 66 Male   | GSE157010 | 1035.616438 |
| GSM4750838 | C1 | 0 | 60 Female | GSE157010 | 1934.136986 |
| GSM4750839 | C1 | 0 | 77 Male   | GSE157010 | 2071.232877 |
| GSM4750840 | C1 | 0 | 65 Male   | GSE157010 | 2156.054795 |
| GSM4750841 | C1 | 1 | 67 Male   | GSE157010 | 1994.30137  |
| GSM4750842 | C1 | 0 | 69 Male   | GSE157010 | 1808.876712 |
| GSM4750843 | C1 | 1 | 52 Male   | GSE157010 | 452.7123288 |
| GSM4750844 | C1 | 0 | 65 Male   | GSE157010 | 1851.287671 |
| GSM4750845 | C1 | 0 | 75 Female | GSE157010 | 2061.369863 |



|            |    |   |           |           |             |
|------------|----|---|-----------|-----------|-------------|
| GSM4750846 | C1 | 0 | 82 Female | GSE157010 | 1731.945205 |
| GSM4750847 | C2 | 0 | 59 Male   | GSE157010 | 1926.246575 |
| GSM4750848 | C1 | 0 | 82 Female | GSE157010 | 1728        |
| GSM4750849 | C1 | 1 | 57 Female | GSE157010 | 589.8082192 |
| GSM4750850 | C1 | 1 | 53 Female | GSE157010 | 1164.821918 |
| GSM4750851 | C1 | 0 | 70 Male   | GSE157010 | 1632.328767 |
| GSM4750852 | C3 | 1 | 63 Male   | GSE157010 | 639.1232877 |
| GSM4750853 | C1 | 1 | 77 Male   | GSE157010 | 360         |
| GSM4750854 | C1 | 0 | 69 Male   | GSE157010 | 1911.452055 |
| GSM4750855 | C1 | 0 | 72 Female | GSE157010 | 1805.917808 |



|         |         |         |          |         |         |         |         |          |         |         |         |         |         |         |         |          |         |         |         |         |         |         |
|---------|---------|---------|----------|---------|---------|---------|---------|----------|---------|---------|---------|---------|---------|---------|---------|----------|---------|---------|---------|---------|---------|---------|
| TGCA-90 | -0.3625 | 0.12731 | -0.40831 | 1.15024 | -0.2832 | 0.81745 | -0.2081 | -0.4735  | 3.21299 | -0.5416 | -0.0908 | -0.2692 | 0.75737 | 1.21502 | -1.4232 | -0.5036  | -0.3588 | -0.3974 | -0.6123 | -0.1189 | -0.669  | -1.1875 |
| TGCA-96 | -0.3625 | 1.14771 | -0.71    | 0.14699 | -0.2832 | -0.5786 | -1.1257 | -0.4735  | 2.26561 | -0.1067 | 0.88767 | -0.2692 | -0.3852 | -0.895  | -0.2145 | -0.5036  | 0.71231 | 0.14144 | -0.1638 | -0.5744 | -0.669  | 0.95064 |
| TGCA-34 | -0.3625 | 1.45314 | -0.2699  | 1.16119 | -0.2832 | 0.17606 | 0.06606 | -0.4735  | -0.393  | -0.2564 | -0.6566 | -0.2692 | -0.3267 | -0.5517 | -0.3283 | -0.5036  | -0.4168 | -0.1411 | -0.0823 | -0.5924 | -0.2831 | 0.30657 |
| TGCA-56 | -0.3625 | 0.769   | 0.10809  | -0.2832 | -0.3956 | -0.0891 | -0.4735 | -0.2003  | -0.2933 | 2.46573 | -0.2692 | -0.2725 | -0.7761 | 0.87901 | -0.5036 | 0.23209  | -0.3974 | 0.6123  | 1.29697 | 0.2432  | -0.669  | -1.1875 |
| TGCA-21 | -0.3625 | -0.0595 | 0.04994  | 0.8538  | -0.2832 | -0.2871 | -0.9883 | -0.4735  | -0.5226 | -0.5416 | -0.2493 | -0.2692 | 0.70309 | 0.13521 | -0.5036 | -0.04994 | -0.3974 | 0.6474  | -0.5924 | 1.31668 | -0.669  | -1.0218 |
| TGCA-22 | -0.3625 | -0.4284 | -0.2478  | 1.0639  | -0.2832 | -0.5889 | 1.34052 | -0.4735  | 5.91602 | -0.5416 | -0.7652 | -0.2692 | 0.44504 | 201149  | -1.4656 | -0.5036  | -0.3841 | -0.3974 | -0.6123 | 0.63894 | -0.669  | -1.0218 |
| TGCA-77 | -0.3625 | 0.9812  | 0.15826  | 1.8134  | -0.2832 | -0.8617 | -1.1257 | -0.4735  | 0.08067 | -0.5416 | 0.33659 | -0.2692 | -0.7209 | 0.46711 | -0.87   | -0.5036  | 1.35786 | -0.3471 | -0.548  | 1.48581 | -0.669  | 0.21927 |
| TGCA-L3 | -0.3625 | -0.1566 | -0.5289  | -0.2793 | -0.2832 | -0.4071 | 0.07351 | -0.4735  | -0.5526 | 0.52489 | -0.8413 | -0.2692 | 0.75816 | -0.5036 | -0.3747 | 0.48395  | -0.8948 | -0.3974 | 0.68908 | -0.5924 | 1.54484 | 1.00139 |
| TGCA-60 | -0.3625 | -0.1785 | 2.44186  | 1.08838 | -0.2832 | 1.45149 | -1.1257 | -0.4735  | -0.5526 | 2.1998  | -0.2972 | -0.2692 | -0.7723 | -0.0466 | -0.8432 | -0.5036  | 0.15831 | 0.22058 | -0.6123 | -0.5924 | 2.0764  | -0.7497 |
| TGCA-37 | -0.3625 | -0.0248 | 1.37304  | -1.3487 | -0.2832 | 2.20421 | 0.69481 | 0.35463  | -0.5526 | 1.1214  | 0.14103 | 0.33982 | -1.5147 | 0.23836 | 0.48793 | -0.1024  | -0.9589 | -0.3974 | 2.05787 | -0.5924 | 2.0566  | -0.7021 |
| TGCA-66 | -0.3625 | 2.70996 | -0.7223  | -0.5702 | -0.2832 | -0.7585 | 1.1257  | -0.4735  | 0.46318 | -0.5416 | -0.8413 | -0.2692 | 0.29459 | -0.3454 | 0.29417 | -0.5036  | 0.77238 | -0.3974 | -0.0697 | 0.02925 | -0.6485 | 0.55845 |
| TGCA-63 | -0.3625 | -0.1364 | 1.37955  | 0.8538  | -0.2832 | 1.91325 | -0.4912 | -0.4735  | 1.1231  | 0.3056  | 1.28155 | -0.2692 | -0.6009 | 0.1948  | -0.1614 | -0.5036  | 0.67993 | 0.20595 | 0.4105  | 0.79072 | -0.669  | -1.0811 |
| TGCA-L3 | -0.3625 | -0.1444 | -0.3903  | -0.7942 | -0.2832 | 0.06294 | 1.1987  | -0.4735  | 0.21921 | -0.5416 | -0.8413 | -0.2692 | 2.0222  | -0.2113 | 1.0494  | -0.5036  | -0.5898 | -0.3974 | -0.6123 | -0.5924 | -0.1519 | -1.1036 |
| TGCA-99 | -0.3625 | 3.88571 | -0.8495  | 0.20559 | -0.2832 | -0.1455 | -1.0569 | -0.4735  | -0.3545 | -0.4517 | -0.8413 | -0.2692 | -0.0591 | -1.1208 | -0.4101 | -0.4813  | -0.1813 | -0.3196 | -0.6123 | -0.5924 | -0.669  | 0.76535 |
| TGCA-77 | -0.3625 | 1.25621 | -0.252   | -1.0696 | -0.2832 | 0.79566 | 0.34441 | -0.4735  | 2.76615 | -0.5416 | -0.8046 | -0.2692 | -0.7453 | 0.96212 | -0.799  | -0.5036  | 0.38235 | -0.3173 | -0.6123 | -0.5924 | 0.15669 | 0.93435 |
| TGCA-66 | -0.3625 | -0.1428 | 1.20368  | -1.1588 | -0.2832 | 2.22643 | -0.3602 | -0.2488  | -0.5526 | -0.5416 | 0.89708 | -0.2692 | -0.9417 | -0.0344 | 1.01135 | -0.5036  | 0.16574 | -0.3974 | -0.5505 | -0.5924 | -0.0887 | -0.1076 |
| TGCA-77 | -0.3625 | 1.59043 | -0.10809 | 0.07630 | -0.2832 | -0.4082 | -0.6341 | -0.4735  | 0.07516 | -0.5416 | -0.8413 | -0.2692 | 1.62188 | -1.1743 | 0.31838 | 0.28129  | -0.9589 | -0.3974 | -0.5485 | -0.5924 | -0.669  | 0.00163 |
| TGCA-63 | -0.3625 | 0.0552  | -1.0809  | 0.16359 | -0.2832 | -0.1083 | 0.03703 | -0.4735  | -0.5526 | 2.97066 | -0.8413 | -0.2692 | 1.49654 | -0.5498 | -0.8083 | 0.27726  | -0.9589 | -0.3974 | -0.5429 | 0.13109 | -0.669  | 0.59273 |
| TGCA-66 | -0.3625 | -0.0847 | -0.5572  | -0.7302 | -0.2832 | 0.63882 | -0.9817 | -0.4735  | -0.5526 | 1.00767 | -0.8413 | -0.2692 | 0.58074 | 0.02488 | 1.41014 | 1.76446  | -0.9589 | -0.3974 | 1.26487 | 0.38774 | -0.1924 | -1.268  |
| TGCA-77 | -0.3625 | 1.62819 | -0.10809 | -0.1658 | -0.2832 | -0.178  | 0.00372 | -0.4735  | 1.5098  | -0.5159 | -0.8413 | -0.2692 | 1.19491 | -1.2942 | -0.0669 | -0.5036  | 0.73313 | -0.3974 | 0.17493 | 0.16321 | -0.669  | 0.45721 |
| TGCA-43 | 1.16447 | -0.8234 | -0.8692  | 0.67952 | -0.2832 | -0.3522 | 0.99066 | -0.4735  | -0.5526 | 2.26527 | -0.6596 | -0.2692 | 0.21453 | -0.6891 | -0.1672 | -0.5036  | 1.39349 | -0.3974 | 1.62646 | 0.43584 | -0.669  | -0.5984 |
| TGCA-22 | -0.3625 | 0.06464 | 0.06091  | -1.5382 | -0.2832 | 1.16508 | -0.3512 | -0.4735  | 3.43018 | -0.4955 | -0.7221 | -0.2692 | -0.7787 | -0.0331 | -1.4871 | -0.5036  | 0.33263 | -0.3974 | -0.471  | -0.4736 | -0.2314 | 3.55414 |
| TGCA-66 | -0.3625 | -0.4397 | -0.5045  | -0.6464 | -0.2832 | -0.2545 | -0.2493 | -0.4735  | -0.2082 | 1.3589  | -0.8413 | -0.2692 | 0.86201 | -0.0783 | 0.79881 | -0.3994  | -0.6005 | -0.3974 | 0.16816 | -0.1383 | -0.4693 | 0.70312 |
| TGCA-77 | -0.3625 | 0.3584  | -0.0214  | 0.25939 | -0.2832 | 1.02965 | -0.1516 | -0.0151  | 1.26131 | -0.5416 | -0.5968 | -0.2692 | 0.46223 | -0.0601 | -0.1814 | -0.5036  | 0.24861 | -0.3974 | -0.1612 | -0.3689 | -0.669  | -0.3628 |
| TGCA-66 | -0.3625 | 0.75705 | 0.30446  | 0.67617 | -0.2832 | 1.27213 | 0.8897  | -0.4735  | -0.4497 | -0.5416 | -0.8413 | -0.2692 | -0.5892 | 1.17809 | -0.5703 | -0.5036  | -0.4304 | -0.3974 | -0.2562 | 0.51189 | -0.669  | -1.1124 |
| TGCA-99 | -0.3625 | 0.6478  | -0.8495  | -0.944  | -0.2832 | 0.91361 | 0.001   | -0.4735  | 0.91361 | -0.5416 | -0.8413 | -0.2692 | 0.18716 | -0.6272 | -0.5036 | 0.28444  | -0.9589 | -0.3974 | -0.6123 | 0.5198  | -0.669  | -0.5849 |
| TGCA-58 | -0.3625 | 0.38122 | -0.0241  | 1.33829 | -0.2832 | 0.83701 | 0.54327 | -0.4443  | -0.5526 | -0.4384 | -1.7436 | -0.2692 | -0.1606 | 0.04491 | -0.5245 | -0.5036  | 0.33659 | -0.3974 | -0.6123 | 0.09433 | -0.669  | -0.5849 |
| TGCA-O2 | -0.3625 | 0.86236 | 0.03579  | 0.94343 | -0.2832 | -0.2974 | 0.57336 | -0.4735  | -0.5526 | -0.5416 | -0.2869 | -0.2692 | -0.4178 | 1.47652 | -0.128  | -0.5036  | 0.56065 | 1.13018 | -0.6123 | 0.81822 | 0.27862 | -1.0137 |
| TGCA-63 | -0.3625 | 0.23945 | 0.09046  | 0.90467 | -0.2832 | 0.09821 | -1.1257 | -0.4735  | -0.1812 | -0.4146 | -0.8413 | -0.2692 | -0.1289 | -0.9132 | 0.17794 | -0.5036  | 0.67429 | -0.2708 | -0.4359 | -0.5924 | 0.20147 | 1.32488 |
| TGCA-37 | -0.3625 | -0.0263 | 0.15388  | -1.5382 | -0.2832 | 1.2005  | 0.48873 | 0.23092  | -0.5526 | -0.5416 | 1.93127 | -0.2692 | -1.1966 | 1.1764  | 2.39081 | -0.5036  | 0.00842 | -0.2581 | -0.4728 | -0.5924 | -0.669  | -0.6165 |
| TGCA-66 | -0.3625 | 0.24383 | 0.22257  | 0.31555 | -0.2832 | 0.11305 | -0.3537 | -0.4735  | -0.5526 | -0.5416 | 1.76205 | -0.2692 | -0.9893 | 0.1168  | 0.66726 | -0.5036  | 0.95241 | -0.3974 | -0.3663 | -0.3527 | -0.6219 | 0.37168 |
| TGCA-34 | -0.3625 | 1.74966 | -0.9496  | -0.4543 | -0.2832 | -0.6952 | -0.8017 | -0.2929  | 0.46012 | -0.5416 | -0.8413 | -0.2692 | 0.39012 | -0.1178 | 1.01935 | -0.5036  | 0.09944 | -0.3974 | -0.5552 | -0.0111 | -0.669  | 0.26476 |
| TGCA-9C | -0.3625 | 0.94325 | 0.04455  | -0.7232 | -0.2832 | 0.6127  | -0.9693 | -0.4735  | -0.2095 | -0.5976 | 0.37678 | -0.2692 | 0.2921  | -0.1011 | 1.14507 | -0.9589  | -0.3974 | 1.17669 | 0.41587 | -0.669  | -1.2918 |         |
| TGCA-56 | -0.3625 | -0.3138 | -0.295   | -0.7538 | -0.2832 | 0.22988 | 0.75382 | -0.4735  | 0.79334 | -0.5416 | 0.0025  | -0.2692 | 0.90736 | 0.22822 | 0.92533 | -0.5036  | 0.94416 | -0.3974 | -0.5656 | -0.5924 | 0.23395 | -1.2373 |
| TGCA-L8 | -0.3625 | 0.25594 | 0.15009  | 0.18189 | -0.2832 | 1.41245 | -0.9508 | -0.3762  | -0.5526 | -0.5416 | 0.26491 | -0.2692 | -1.0984 | 0.98724 | -0.3159 | -0.5036  | -0.2467 | 1.89088 | -0.3288 | -0.5924 | 1.25492 | -0.9574 |
| TGCA-56 | -0.3625 | 0.96067 | -0.6932  | 0.61457 | -0.2832 | 0.10753 | -0.2056 | -0.4735  | -0.5526 | -0.5416 | -0.8413 | -0.2692 | 0.8161  | -1.137  | -0.6733 | 0.32702  | -0.9589 | -0.3974 | 0.30716 | -0.4239 | -0.669  | 0.87916 |
| TGCA-33 | -0.3625 | -0.0464 | 0.53144  | -1.0221 | -0.2832 | 1.9076  | -1.1257 | -0.60699 | -0.5526 | 3.13433 | -0.8413 | -0.2692 | -0.0516 | -0.3261 | -0.8394 | -0.5036  | -0.1101 | -0.3974 | -0.5504 | -0.4089 | -0.6647 | -0.7054 |
| TGCA-43 | 0.93699 | -0.905  | -0.7483  | 1.9843  | -0.2832 | 0.56498 | 1.21406 | -0.4735  | 1.9738  | -0.5416 | -0.8413 | -0.2692 | 1.20148 | -0.602  | -0.443  | -0.5036  | 0.61009 | -0.2862 | -0.6123 | 0.82015 | -0.669  | -0.5876 |
| TGCA-77 | 0.88397 | 0.57786 | -0.116   | 1.23352 | -0.2832 | 0.93976 | -0.828  | -0.4735  | 2.47381 | -0.4019 | -0.3012 | -0.2692 | -0.6071 | -1.1854 | -0.5055 | -0.5036  | -0.1789 | 1.97595 | 0.5516  | -0.5932 | -0.669  | -0.0046 |
| TGCA-52 | -0.3625 | 0.10435 | 0.04455  | -0.7232 | -0.2832 | 0.6127  | -0.9693 | -0.4735  | -0.2095 | -0.5976 | 0.37678 | -0.2692 | 0.2921  | -0.1011 | 1.14507 | -0.9589  | -0.3974 | 1.17669 | 0.41587 | -0.669  | -1.2918 |         |
| TGCA-46 | -0.3625 | 0.41599 | -1.0809  | -1.5382 | -0.2832 | 0.63774 | -0.6525 | -0.4735  | 2.09846 | -0.5416 | -0.8413 | -0.2692 | 2.60501 | -0.6856 | -0.5055 | -0.5036  | 0.33659 | -0.3974 | -0.354  | -0.158  | 0.7651  | 1.0846  |
| TGCA-L8 | -0.3625 | 1.46312 | -1.0576  | 0.15682 | -0.2832 | 1.64397 | 0.57806 | -0.4282  | -0.5526 | -0.2927 | 0.87069 | -0.2692 | -1.383  | -0.6879 | -0.6258 | -0.5036  | 0.64432 | -0.3974 | 4.22625 | 0.09184 | -0.669  | -0.7323 |
| TGCA-63 | -0.3625 | 0.47361 | -0.1054  | -1.5382 | -0.2164 | -0.3326 | -1.1257 | -0.4735  | 2.92706 | -0.3233 | -0.8413 | -0.2692 | -0.9997 | -1.0371 | -1.9717 | 0.9944   | -0.9589 | -0.3974 | 1.73152 | -0.5924 | 0.10864 | -0.4435 |
| TGCA-56 | -0.3625 | 0.3052  | -1.0809  | 1.59132 | -0.2832 | -0.5973 | 0.95794 | -0.4735  | -0.5526 | 1.75073 | -0.8413 | -0.2692 | 0.70889 | -0.8786 | -0.5022 | 2.55021  | -0.9589 | -0.3974 | -0.0553 | -0.5924 | -0.669  | -1.1411 |
| TGCA-60 | -0.3625 | 0.11526 | -0.0224  | 0.62299 | -0.2832 | 0.37997 | -0.4905 | -0.4735  | 0.77455 | -0.5416 | -0.8413 | -0.2692 | 1.04152 | 0.43149 | -0.7461 | -0.5036  | -0.2956 | -0.3974 | -0.6048 | -0.5924 | 0.24881 | 1.09815 |
| TGCA-60 | -0.3625 | -0.5891 | 0.59535  | -0.2996 | -0.2832 | 1.63024 | -0.22   | -0.4735  | 0.97147 | -0.0531 | 1.03362 | 0.98268 | -0.248  | -0.45   | 0.66771 | -0.5036  | 0.36314 | 3.30418 | 0.10333 | -0.5924 | 0.29928 | 1.114   |
| TGCA-52 | -0.3625 | 0.94325 | 0.04455  | -0.7232 | -0.2832 | 0.6127  | -0.9693 | -0.4735  | -0.2095 | -0.5976 | 0.37678 | -0.2692 | 0.2921  | -0.1011 | 1.14507 | -0.9589  | -0.3974 | 1.17669 | 0.41587 | -0.669  | -1.2918 |         |
| TGCA-34 | -0.3625 | 0.99998 | -0.2874  | 0.10563 | -0.2832 |         |         |          |         |         |         |         |         |         |         |          |         |         |         |         |         |         |

TCGA-43 -0.3625 -0.8512 0.31102 1.43339 -0.2832 0.738 -1.1257 -0.4735 -0.5526 0.74106 0.55747 -0.2692 0.06194 -0.4276 1.76365 -0.4077 -0.9589 -0.3974 -0.4684 -0.5924 0.33691 -1.2479

TCGA-99 -0.3625 -0.905 0.90946 0.78435 -0.2832 0.37031 -1.1257 -0.4735 -0.5526 -0.4054 -0.4418 -0.2692 0.91186 0.79661 -0.0628 -0.5036 -0.2837 -0.3974 -0.4363 -0.5924 1.03782 -0.8134

TCGA-77 -0.3625 0.89474 -0.17198 -0.99 -0.2832 0.4537 0.8095 -0.4735 0.3633 -0.5416 3.75724 -0.2692 -1.1874 1.57772 -0.1471 -0.5036 1.02056 -0.3609 -0.6123 -0.5924 0.13303 -0.8114

TCGA-92 -0.3625 0.54281 -0.2398 1.04275 -0.2832 0.41457 -0.14275 -0.4735 -0.5526 0.05611 -0.4068 -0.2692 0.94907 -1.17076 0.2898 -0.5036 0.87525 -0.2742 0.04099 -0.5924 0.54441 -0.706

TCGA-56 -0.3625 0.30621 -1.0809 -0.5352 -0.2832 0.27642 -0.0215 -0.4735 -0.1475 -0.5416 -0.8413 -0.2692 0.42809 -1.5771 -0.1841 -0.5036 0.3321 -0.3974 -0.223 -0.669 2.21979 -0.669

TCGA-70 -0.3625 0.41653 -0.0676 0.93711 -0.2832 -1.0332 -1.1257 -0.4735 0.47691 -1.9045 -0.8413 -0.2692 0.91667 0.24918 0.81738 0.08285 -0.9589 -0.3974 -0.3434 -0.5924 1.48051 -0.2405

TCGA-43 -0.1741 1.20395 0.35346 -0.3814 -0.2832 0.48318 -0.3791 -0.3261 0.09004 -0.5416 -0.8413 -0.2692 -0.7444 -0.6905 -1.2852 -0.5036 -0.1453 -0.4679 -0.6123 -0.4675 -0.669 3.10003

TCGA-66 -0.3625 0.3306 0.68647 -0.7959 -0.2832 0.96073 -0.1977 -0.4735 -0.3283 -0.5416 -0.8413 -0.2692 1.22576 -0.015 0.06864 -0.5036 -0.1466 -0.2611 -0.5873 -0.5924 0.9137 -0.4717

TCGA-85 -0.3625 -0.2789 0.56575 -0.245 -0.2832 1.29807 0.36794 -0.4735 3.2884 -0.2378 3.96991 -0.2692 -1.2187 0.63444 -1.3591 0.22494 -0.9589 0.5173 -0.0726 -0.5924 1.49804 -0.8962

TCGA-58 -0.3625 0.37405 0.74208 -0.1477 -0.2832 0.65551 -0.1074 0.74405 -0.165 -0.5416 -0.0474 -0.2692 -0.7081 0.01488 -0.1709 -0.5036 0.44457 -0.3974 0.06282 -0.3818 -0.669 2.44412

TCGA-85 -0.3625 -0.5009 -0.2035 -1.2535 -0.2832 2.31132 1.8794 -0.4735 -0.5526 2.19134 -0.8413 -0.2692 0.72209 -0.3476 -1.0772 -0.5036 0.90253 -0.3974 -0.6123 0.02356 -0.2269 -1.1057

TCGA-21 -0.3625 0.71174 -0.6236 -0.2052 -0.2832 0.23662 -0.0745 -0.4735 -0.1475 -0.5416 -0.8413 -0.2692 0.59491 -1.136 -0.8599 -0.5036 0.3321 -0.3974 -0.223 -0.669 1.74207 -0.669

TCGA-33 -0.3625 0.17488 0.44395 -1.5382 -0.2832 1.81861 0.1548 -0.4735 1.73229 0.69315 -0.8413 -0.2692 -0.8626 1.21381 -1.3259 -0.5036 -0.1392 -0.3974 -0.6123 -0.5924 -0.669 0.6144

TCGA-56 -0.3625 0.14711 0.37904 -0.2713 -0.2832 0.4923 0.03337 -0.4735 1.77475 -0.5416 0.6181 -0.2692 -0.4798 0.20226 0.25161 -0.5036 0.4282 1.27277 -0.5886 -0.4715 0.9578 -0.208

TCGA-34 -0.3625 0.05414 -1.0809 -0.1391 -0.2832 0.87191 0.2673 -0.4735 -0.5526 0.3026 0.46995 -0.2692 -0.4573 -0.2194 -1.1922 -0.1766 -0.1237 0.45292 -0.2958 0.58603 -0.2942 -0.444

TCGA-60 -0.3625 0.28299 1.95183 1.41305 -0.2832 1.13836 -1.1257 0.00668 -0.5526 -0.5416 -0.2199 -0.2692 -0.7706 0.37037 -1.3077 -0.5036 0.55124 -0.3974 -0.6123 -0.5924 -0.3503 -0.1895

TCGA-77 -0.3625 0.04693 -0.3714 0.7932 -0.2832 0.36496 -0.3341 -0.4735 -0.5526 -0.5416 -0.8413 -0.2692 0.338 -0.494 -1.036 0.46799 -0.7247 -0.3974 -0.4167 -0.5924 2.52383 -0.7395

TCGA-66 -0.3625 -0.2032 2.20599 -0.9142 -0.2832 1.93667 -0.8909 -0.2687 -0.11309 0.4824 -0.1778 -0.2692 -0.8774 -0.0141 0.41882 -0.5036 -0.0064 -0.0328 -0.4053 -0.5924 1.31155 -0.15

TCGA-66 -0.3625 0.85131 -0.5931 -1.582 -0.2832 0.36355 -0.4094 -0.319 -0.24 -0.58538 -0.8413 -0.2692 1.35279 -1.0396 -0.5414 -0.5036 0.77032 -0.3974 -0.3233 -0.1105 -0.669 0.84111

TCGA-94 -0.3625 0.11417 -0.1089 -0.6343 -0.2832 -0.6662 0.18108 -0.4735 -0.4225 0.05189 -0.4003 -0.2692 2.9493 -0.6178 -0.276 -0.5036 -0.1155 -0.3974 -0.0751 0.69444 -0.669 -0.9197

TCGA-56 -0.3625 0.20502 -0.9395 0.98557 -0.2832 0.15503 -1.1257 -0.4735 2.79699 -0.0317 -0.3793 -0.2692 -0.997 -1.0966 -1.1232 -0.5036 1.18056 0.52923 1.11075 -0.059 -0.669 0.96075

TCGA-22 -0.3625 0.38246 0.72238 1.8745 -0.2832 0.86983 0.03002 -0.4735 1.17341 -0.5416 0.20802 -0.2692 -0.6052 0.21886 1.13002 -0.5036 0.54511 -0.3974 -0.3914 -0.4902 -0.669 -0.0661

TCGA-77 -0.2498 -0.8061 -0.7322 0.57767 -0.2832 -0.4858 0.45311 -0.4735 1.16353 -0.3134 0.45457 -0.0919 2.17076 -1.3224 0.0674 1.89327 -0.9589 -0.3974 -0.5127 -0.5924 -0.669 -1.0891

TCGA-21 -0.3625 0.42839 1.52694 -0.8563 -0.2832 2.14672 -0.2077 -0.4735 -0.2921 0.78007 -0.6414 -0.2692 -0.6039 -0.5682 -0.5929 -0.5036 0.55006 -0.3052 0.1271 -0.5924 0.30272 -0.2844

TCGA-98 -0.3625 1.12547 -0.67487 0.23713 -0.2832 0.39167 1.10959 -0.4735 0.35683 -0.5416 -0.8413 -0.2692 -0.2799 -0.4963 -0.5862 -0.5036 0.24126 -0.3731 -0.6123 -0.1875 -0.5111 -0.8382

TCGA-34 -0.3625 0.38629 0.1989 0.00493 -0.2832 0.3971 -1.1257 -0.4735 -0.0157 -0.4735 -0.3189 0.90624 -0.2692 0.5907 -1.3218 -0.6966 -0.5036 0.3321 -0.3974 -0.223 -0.669 0.84111

TCGA-21 -0.3625 0.72216 0.87993 -0.8681 -0.2832 0.59537 -0.4316 -0.4735 -0.5526 -0.4728 -0.6564 -0.2692 0.64405 -1.2991 -0.6607 -0.5036 1.18572 -0.3974 -0.6123 -0.0511 0.42036 0.55031

TCGA-60 -0.3625 -0.9044 -1.0809 1.22956 -0.2832 -0.807 -1.1257 -0.4735 -0.5526 0.86988 -0.68054 -0.2692 2.57256 -1.7519 0.62335 -0.5036 -0.1981 -0.3974 -0.3042 -0.5924 0.11775 -1.2017

TCGA-96 -0.3625 -0.4719 0.90834 0.17511 -0.2832 0.25773 -0.3805 1.44615 -0.5526 -0.5416 -0.9626 -0.2692 0.60709 0.10235 -0.1041 -0.5036 0.79565 -0.3974 -0.6123 -0.2989 -0.669 -0.3679

TCGA-66 -0.3625 0.14548 -0.1211 0.00363 -0.2832 0.59767 -1.1257 -0.4735 -0.4613 -0.3015 -0.4254 -0.2692 -0.0766 0.92862 -0.2658 -0.5036 0.66562 -0.3974 0.95659 -0.5924 -0.0088 0.72183

TCGA-56 -0.3625 0.41732 -0.0809 0.56456 -0.2832 -0.278 -0.3748 0.76066 -0.5526 -0.5416 -0.8587 -0.2692 -0.2968 -1.4884 -0.4082 -0.5036 1.65467 0.04656 -0.6123 -0.0878 -0.669 -0.8641

TCGA-22 -0.3625 1.43567 -0.0751 0.89495 -0.2832 -0.1445 -1.1257 -0.4735 -0.5526 -0.5416 -0.8413 -0.2692 0.49826 -0.5812 0.7642 -0.393 -0.4331 -0.3974 -0.5325 -0.0756 -0.0379 0.45396

TCGA-21 -0.3625 0.22621 -0.5782 0.55249 -0.2832 0.26481 0.9737 -0.4735 0.34414 -0.1747 -0.4735 0.2692 -0.2459 -0.0214 1.15226 -0.5036 0.37575 -0.0768 -0.6123 0.04026 -0.669 -0.3531

TCGA-85 -0.3625 1.7749 -0.4829 0.84188 -0.2832 0.41939 -0.6803 -0.4735 1.11216 -0.5416 -0.8716 -0.2692 0.72749 -0.4229 -0.6131 -0.5036 -0.249 -0.3974 -0.3514 -0.5924 0.0981 -0.9194

TCGA-21 -0.3625 1.42115 -1.0809 1.82243 -0.2832 -1.0915 -1.1257 -0.4735 -0.5526 -0.3689 -0.8413 -0.2692 1.4381 -0.8132 -0.7006 -0.5036 -0.7447 -0.3974 -0.6123 -0.5924 0.15478 0.55317

TCGA-46 -0.3625 0.78705 -0.0757 1.7738 -0.2832 -1.0685 -0.8343 -0.4735 -0.5526 -0.5416 -0.7326 -0.2692 -0.7109 0.08365 0.56135 -0.5036 0.43318 -0.3974 -0.3475 -0.437 -0.326 2.20188

TCGA-39 -0.3625 -0.245 0.58366 0.88133 -0.2832 1.02986 -1.1257 -0.4735 -0.2505 -0.3225 -0.1133 -0.2692 0.28745 -0.0254 -0.4271 -0.5036 0.05703 -0.2297 -0.6123 -0.5924 -0.669 0.40481

TCGA-90 -0.3625 1.2996 -0.6325 -0.3267 -0.2832 -0.1701 -0.3309 -0.3542 0.88288 -0.5416 -0.8413 -0.2692 1.19676 -0.9381 -0.114 -0.2812 -0.3303 -0.3974 0.13457 -0.5924 -0.669 0.13197

TCGA-39 -0.3625 0.11384 0.54828 -0.6145 -0.2832 0.92956 0.60145 1.1415 -0.4417 -0.5416 -0.212 -0.2692 -0.6895 1.08476 1.14839 -0.5036 -0.4935 1.9279 -0.416 -0.4418 -0.669 -0.6245

TCGA-98 -0.3625 0.34809 0.1989 0.00493 -0.2832 0.31744 -1.1257 -0.4735 -0.3878 -0.3189 0.71243 -0.2692 0.4307 -1.7125 -0.574 -0.5036 0.69262 0.1139 -0.6123 -0.5924 -0.669 -0.3531

TCGA-98 0.69677 -0.6716 -0.1119 0.9131 -0.2832 -0.8023 -1.1257 -0.4735 -0.3421 0.98156 1.48146 -0.2692 1.05622 -1.3685 0.58258 2.9251 -0.9589 0.21642 -0.1196 -0.5572 -0.4481 -0.7711

TCGA-66 -0.3625 1.81516 -0.501 -1.0389 -0.2832 0.08179 -0.2257 -0.4735 -0.5526 0.70081 -0.6469 -0.2692 -0.8945 -1.3082 -1.1263 -0.5036 0.96654 -0.3974 3.95842 0.05322 -0.669 1.86928

TCGA-37 -0.3625 -0.4397 0.29874 -0.1848 -0.2832 2.09891 0.68197 -0.4735 3.92107 -0.5416 -0.8413 -0.2692 -0.1823 0.41154 -0.8887 -0.5036 -0.2919 -0.3974 -0.6123 -0.4704 -0.669 0.23234

TCGA-56 -0.3625 -0.6327 -0.396 2.2723 -0.2832 0.69592 -0.7189 -0.4735 -0.5526 -0.5416 -0.0496 -0.2692 0.62685 0.07721 0.32677 -0.4998 -0.8649 -0.3974 -0.2904 -0.5924 1.09749 -1.2255

TCGA-63 -0.3625 1.46112 0.28276 -1.5382 -0.2832 0.91425 2.71398 -0.4735 -0.2313 -0.5416 1.25746 -0.2692 -0.7081 1.02941 -0.3872 -0.5036 -0.7422 -0.2719 -0.5216 -0.4042 0.38053 -0.7873

TCGA-60 -0.3625 0.10235 -0.1693 -1.5382 -0.2832 0.13415 1.17417 -0.4735 0.83613 -0.5416 -0.1799 -0.2692 0.71291 -0.5458 2.57795 -0.5036 0.42499 -0.3974 -0.6123 -0.5924 0.43533 -0.8587

TCGA-90 0.94867 0.34809 0.1989 0.00493 -0.2832 0.22943 0.98043 -0.4735 0.11334 -0.4042 -0.2692 0.03813 -0.9197 -0.5036 0.69262 0.1139 -0.6123 -0.5924 -0.669 -0.3531

TCGA-56 -0.3625 0.04562 -0.1017 0.12064 -0.2832 -0.9067 -1.1257 -0.4735 -0.5526 -0.5416 -0.7982 -0.2692 5.7798 2.30482 -1.5466 2.00014 -0.1416 -0.9589 -0.3974 -0.6123 -0.5924 2.22033 -1.2042

TCGA-43 -0.3625 0.78965 -0.3836 1.12124 -0.2832 0.79631 -0.4969 -0.4268 -0.1742 -0.1762 -0.5483 -0.2692 0.15213 -0.7648 0.17022 -0.5036 -0.1416 -0.3974 -0.2861 -0.5924 -0.669 -0.0772

TCGA-18 -0.3625 -0.5675 0.37263 1.11906 -0.2832 2.44862 -0.2081 -0.4735 -0.0252 -0.5416 -0.5786 -0.2692 -0.7318 -1.1847 -0.6884 -0.5036 -0.6606 0.3628 -0.6123 -0.5924 0.15253 -1.0799

TCGA-77 -0.3625 1.03205 -0.5652 1.02237 -0.2832 -0.8273 -1.1257 -0.4735 -0.5526 -0.5416 -0.3839 -0.2692 1.31 0.56396 -0.524 -0.5036 -0.5411 -0.3974 -0.0907 -0.5924 -0.1619 -0.8185

TCGA-60 -0.3625 0.11373 -0.3021 0.23497 -0.2832 0.32282 -0.1684 -0.4735 -0.2915 -0.1184 -0.1473 -0.2692 0.46525 -0.4737 0.58311 -0.5036 0.3362 1.30409 -0.2143 -0.5924 0.44408 -0.4315

TCGA-22 -0.3625 0.85901 -0.8989 1.56144 -0.2832 -0.5381 -0.5966 -0.4735 0.42001 -0.5416 -0.8413 -0.2692 2.11908 -0.5826 -0.0208 -0.5036 -0.779 -0.3974 -0.6123 -0.5924 -0.669 -1.1011

TCGA-66 -0.3625 0.21148 -0.1582 0.55249 -0.2832 0.26481 0.9737 -0.4735 0.34414 -0.1747 -0.4735 0.2692 -0.2459 -0.0214 1.15226 -0.5036 0.37575 -0.0768 -0.6123 0.04026 -0.669 -0.3531

TCGA-18 -0.3625 0.24331 0.0717 0.82217 -0.2832 -0.2325 -0.1031 -0.1506 -0.5526 -0.5416 0.98313 2.5056 -1.2806 0.30047 -0.4898 -0.5036 -0.0749 -0.2103 0.55117 -0.5924 -0.669 1.86872

TCGA-77 -0.3625 0.79361 -0.9413 -0.1619 -0.2832 -0.2794 -0.4326 -0.4735 0.66441 -0.5416 -0.4429 -0.2692 1.22179 -0.3376 -0.363 0.90642 -0.9589 -0.3974 -0.6123 -0.5924 -0.1213 0.4269

TCGA-21 -0.3625 0.52551 0.20646 0.74801 -0.2832 0.17918 1.12051 -0.4735 -0.5526 0.70041 -0.7723 -0.2692 -0.7597 -0.0482 -0.3753 -0.5036 -0.5427 -0.3974 0.48813 -0.5924 0.64371 0.64617

TCGA-43 -0.3625 -0.6254 2.46715 -0.9424 -0.2832 2.80013 -0.26 -0.4735 -0.5526 -0.5416 0.16419 -0.2692 -0.5591 -0.58745 0.20699 -0.5036 -0.0108 -0.3974 -0.5616 -0.5924 0.21254 -1.2202

TCGA-85 -0.3625 1.44712 -0.6301 1.69999 -0.2832 0.2432 -0.8563 -0.4735 -0.5526 -0.4834 -0.8413 -0.2692 0.58377 0.01091 0.19817 -0.5036 -0.9281 -0.3974 -0.6123 -0.5127 -0.669 -1.6781

TCGA-85 -0.3625 1.2773 -0.8915 0.02766 -0.2832 -0.3355 -0.3414 -0.4735 0.71087 -0.5416 -0.8413 -0.2692 1.14658 -0.3762 0.60327 -0.3409 -0.9589 -0.3974 -0.1176 -0.5924 -0.669 0.98811

TCGA-98 -0.3625 0.34809 0.1989 0.00493 -0.2832 0.01249 0.94867 -0.4735 0.15983 -0.5416 -0.8413 -0.2692 0.4307 -1.7125 -0.574 -0.5036 0.69262 0.1139 -0.6123 -0.5924 -0.669 -0.3531

TCGA-58 -0.3625 0.05303 0.73763 0.62673 -0.2832 0.3243 0.44552 -0.4735 0.22511 0.36073 0.489 -0.2692 -0.6887 -0.3596 0.27675 -0.5036 0.06033 -0.3974 -0.0743 -0.1886 -0.1047 -0.8649

TCGA-66 -0.3625 0.70232 -0.1809 1.60827 -0.2832 0.55949 -1.1257 -0.4735 -0.5526 -0.5416 -0.5704 -0.2692 -1.1072 -0.297 1.0254 -0.4423 -0.1287 0.09843 -0.3704 -0.5924 -0.5232 0.9496

TCGA-LA -0.3625 -0.6507 -0.6211 -1.2398 -0.1306 -0.8618 -1.1257 -0.4735 -0.5526 1.77008 -0.8413 -0.2692 2.36198 -1.7519 1.54484 1.09424 -0.9589 -0.3974 1.10588 -0.5924 0.59825 -1.2484

TCGA-77 -0.3625 -0.3679 -0.2561 0.01334 -0.2832 0.53142 -0.5113 -0.4735 -0.4818 -0.5416 -0.8413 -0.2692 0.82088 -0.9155 2.84632 -0.4053 -0.8938 0.42426 -0.0303 -0.5924 0.02784 -1.066

TCGA-85 -0.3625 -0.0494 -0.07712 1.17177 -0.2832 0.1306 0.0499 -0.4735 1.08145 -0.5416 -0.8413 -0.2692 0.33638 -0.7217 0.01353 1.59838 -0.9589 -0.3974 -0.6123 0.06255 0.3341 -0.4861

TCGA-22 -0.3625 0.15995 -0.1976 -1.5382 -0.2832 1.09825 0.9469 -0.4735 2.99547 -0.5416 -0.4707 -0.2692 -0.3611 0.97977 -0.3121 -0.5036 0.36642 -0.3974 -0.4315 -0.5924 0.96271 0.94765

TCGA-77 -0.3625 0.34809 0.1989 0.00493 -0.2832 0.22943 0.98043 -0.4735 0.11334 -0.4042 -0.2692 0.03813 -0.9197 -0.5036 0.69262 0.1139 -0.6123 -0.5924 -0.669 -0.3531

TCGA-22 -0.3625 1.78883 -0.1977 0.3534 -0.2832 0.38539 -0.2959 -0.4735 0.55637 1.90153 1.03888 -0.2692 -1.0036 -0.8827 0.00513 -0.5036 0.30103 -0.1675 -0.3731 -0.124 -0.669 0.2423

TCGA-66 -0.3625 -0.2462 0.92205 -1.5382 -0.2832 3.76843 -0.1718 -0.4735 0.64023 -0.5416 0.99733 -0.2692 -0.7237 -0.3304 -0.6273 -0.5036 0.24858 -0.3974 -0.6123 -0.5924 2.16104 -1.181

TCGA-22 -0.3625 -0.5606 0.85652 0.93874 -0.2832 0.32526 1.08412 -0.4735 0.05856 1.50473 1.4858 -0.2692 -0.7302 -0.2988 0.30844 -0.5036 1.53079 -0.3974 0.17861 -0.4201 -0.669 -1.1693

TCGA-77 -0.3625 2.46812 -0.8651 0.3541 -0.2832 -0.1054 0.55993 -0.4735 0.07833 0.13492 -0.7528 -0.2692 -0.3791 -1.3176 -0.9062 -0.5036 0.23782 -0.3974 -0.3025 0.72837 -0.669 1.15813

TCGA-56 -0.3625 -0.6279 -1.0809 -0.6043 -0.2832 -1.028 0.73615 -0.4735 -0.5526 2.35878 -0.8413 1.95006 0.228 -1.7172 -0.6779 8.70903 -0.9589 -0.3974 0.17185 -0.4634 -0.669 -0.6525

TCGA-85 -0.3625 -0.5782 1.06201 -1.0539 -0.2832 0.22761 1.0328



|         |         |         |         |         |         |          |         |         |         |          |         |         |         |         |         |         |         |         |         |          |         |         |
|---------|---------|---------|---------|---------|---------|----------|---------|---------|---------|----------|---------|---------|---------|---------|---------|---------|---------|---------|---------|----------|---------|---------|
| GSMA750 | 1.14482 | -0.905  | -1.0809 | 1.22289 | -0.2832 | -1.1028  | 1.24526 | -0.4735 | -0.5526 | 4.76351  | -0.8413 | -0.2692 | -0.535  | -0.9819 | 0.73111 | -0.5036 | 0.09118 | -0.3974 | -0.6123 | -0.0417  | 0.16688 | 0.53184 |
| GSMA750 | 0.4481  | -0.905  | 0.37329 | -0.3084 | 0.11806 | -0.6568  | -0.0567 | 1.17743 | -0.5526 | -0.4427  | 0.09005 | -0.1425 | -0.4343 | 1.22439 | 0.5522  | 1.05492 | -0.9589 | -0.3974 | 0.36612 | -0.5924  | 0.50786 | -0.2896 |
| GSMA750 | 0.70225 | -0.905  | 0.06999 | -0.06   | -0.2832 | -0.0467  | 0.40474 | -0.4735 | -0.5526 | 2.31088  | -0.5526 | 0.2992  | 0.59243 | -0.5377 | -0.2099 | -0.7407 | -0.3974 | 0.27863 | -0.5924 | 0.33448  | -0.5036 | 0.53184 |
| GSMA750 | 0.3625  | -0.905  | -0.1597 | -0.5526 | -0.2832 | -0.6915  | -0.2832 | 2.61881 | -0.5526 | -0.5416  | -0.0641 | 0.56235 | -0.4064 | 0.35701 | 0.5549  | -0.9589 | -0.3974 | -0.1593 | -0.5924 | -0.3974  | -0.1593 | 0.53184 |
| GSMA750 | 2.51929 | -0.905  | 0.30085 | -0.1954 | 1.80354 | -0.7745  | 1.03818 | 0.22696 | -0.5526 | -0.5416  | 1.56111 | -0.2692 | -0.9637 | 2.15601 | 0.43731 | -0.3028 | -0.9547 | -0.3974 | 0.1037  | -0.5924  | 0.32463 | -0.1692 |
| GSMA750 | -0.3625 | -0.6945 | 0.1932  | 1.07653 | -0.2832 | -1.1028  | -1.0356 | 1.59731 | -0.5526 | -0.5416  | 0.0302  | -0.2692 | -0.6271 | 1.45945 | 0.71444 | -0.5036 | 0.52127 | -0.3974 | 0.04097 | -0.5469  | -0.6483 | 0.79662 |
| GSMA750 | -0.2563 | -0.905  | 0.4166  | 0.56492 | -0.2832 | -1.1028  | -1.1257 | -0.4735 | -0.5526 | -0.5416  | -0.8413 | -0.2692 | 1.11089 | -0.7172 | -0.093  | 2.5097  | -0.9589 | -0.3974 | 0.46797 | -0.5924  | 1.39665 | 0.56676 |
| GSMA750 | -0.3625 | -0.0334 | -0.4526 | -0.8691 | -0.2832 | -0.5513  | 1.68095 | 1.18769 | -0.5526 | -0.5416  | -0.211  | -0.1953 | -0.7155 | 0.93306 | 0.57544 | -0.259  | -0.4401 | -0.3974 | -0.4959 | -0.5924  | -0.6176 | 1.07671 |
| GSMA750 | -0.3625 | -0.4625 | -1.0302 | -1.3985 | 2.98114 | -1.1028  | 1.2157  | -0.4735 | 2.21378 | 0.03911  | -0.8413 | 0.04443 | 0.41376 | -0.5972 | -0.1979 | 1.69353 | -0.9589 | -0.3974 | -0.0885 | -0.5924  | 4.38111 | 0.67219 |
| GSMA750 | -0.3625 | -0.7169 | 1.34269 | -1.1321 | 1.92095 | -0.4675  | 0.07899 | 1.51363 | -0.5526 | -0.5416  | -0.5967 | -0.0992 | -0.1434 | 1.13968 | 0.69036 | 0.56341 | -0.9589 | -0.3974 | 0.15648 | -0.2254  | -0.669  | 0.2965  |
| GSMA750 | -0.3625 | -0.905  | 1.14643 | -0.7423 | -0.2832 | -0.1152  | 0.88639 | 1.03044 | -0.5526 | -0.5416  | -0.1345 | -0.2692 | -0.5603 | 0.94724 | 0.02604 | -0.1495 | -0.7791 | -0.3974 | 0.1158  | 0.31667  | -0.669  | 1.39639 |
| GSMA750 | 0.45669 | -0.905  | 0.30085 | -0.1954 | 1.80354 | -0.7745  | 1.03818 | 0.22696 | -0.5526 | -0.5416  | 1.56111 | -0.2692 | -0.9637 | 2.15601 | 0.43731 | -0.3028 | -0.9547 | -0.3974 | 0.1037  | -0.5924  | 0.32463 | -0.1692 |
| GSMA750 | -0.3625 | -0.905  | 0.03942 | 0.91005 | -1.1028 | -1.0356  | 1.59731 | -0.5526 | -0.5416 | -0.1177  | -0.1545 | -0.1559 | 0.50346 | 1.09709 | -0.8019 | 0.80806 | -0.9589 | -0.3974 | 0.32131 | -0.5924  | 3.57881 | -0.247  |
| GSMA750 | -0.3625 | -0.4915 | -0.91   | 0.93335 | -0.2832 | -1.1028  | 1.52652 | 2.2878  | -0.5526 | -0.5416  | -0.306  | -0.2692 | 0.27523 | 0.00727 | 0.63728 | -0.1046 | -0.9589 | -0.3974 | 1.57592 | -0.5081  | -0.669  | 0.06028 |
| GSMA750 | -0.3625 | -0.4546 | -0.0161 | -0.2049 | 1.03479 | -1.1028  | 0.99689 | 2.69985 | -0.5526 | -0.5416  | -0.4939 | -0.2692 | -0.3971 | 0.61706 | -0.0453 | -0.2078 | -0.8419 | -0.3974 | -0.2949 | -0.3354  | -0.669  | 2.19775 |
| GSMA750 | 0.20688 | -0.905  | 0.68933 | -0.163  | 3.57118 | -1.1028  | 1.63758 | 0.07791 | -0.5526 | 0.09936  | -0.3031 | -0.2692 | -1.0349 | 0.88896 | 0.70586 | -0.0568 | -0.4729 | -0.0881 | 0.0394  | -0.2301  | 1.07026 | 0.93447 |
| GSMA750 | 0.38669 | -0.905  | -0.5243 | 1.64725 | 0.8371  | -1.1028  | 1.1257  | -0.4735 | -0.5526 | -0.2988  | -0.4401 | -0.2692 | 0.24923 | -0.2917 | 0.0395  | -0.5036 | 0.01259 | -0.3974 | -0.5194 | -0.5924  | 1.07026 | 1.74485 |
| GSMA750 | 0.28728 | -0.905  | 0.68933 | -0.163  | 3.57118 | -1.1028  | 1.63758 | 0.07791 | -0.5526 | 0.09936  | -0.3031 | -0.2692 | -1.0349 | 0.88896 | 0.70586 | -0.0568 | -0.4729 | -0.0881 | 0.0394  | -0.2301  | 1.07026 | 0.93447 |
| GSMA750 | 0.82079 | -0.7035 | 0.05681 | 0.2117  | -0.0723 | -0.2952  | 0.79907 | 0.4735  | -0.5526 | -0.5416  | 1.99477 | -0.2692 | -0.1304 | 0.45986 | -0.9952 | -0.5036 | 1.5836  | -0.3974 | -0.6123 | 0.4277   | 1.45568 | -0.495  |
| GSMA750 | 3.38743 | -0.905  | -1.0809 | 0.84853 | 1.091   | -1.1028  | 2.36189 | -0.4735 | -0.5526 | 0.30933  | 0.38663 | -0.2692 | -0.4153 | -0.5298 | -1.4656 | 0.89535 | -0.3609 | 0.5145  | -0.6123 | -0.5924  | -0.2377 | -0.028  |
| GSMA750 | -0.3625 | -0.8464 | -0.0839 | 0.05169 | -0.2832 | -1.1028  | 0.04226 | 2.5887  | -0.5526 | -0.5416  | -0.182  | -0.2692 | 0.01063 | 0.76573 | 1.73665 | 0.19027 | -0.9589 | -0.3974 | 0.02549 | 0.61798  | -0.669  | -0.0612 |
| GSMA750 | -0.3625 | -0.7845 | 0.14226 | 1.06661 | -0.2832 | -0.866   | -0.3985 | 0.97971 | -0.5526 | -0.5416  | -0.7845 | -0.2692 | 0.93552 | 0.85026 | -0.2613 | -0.0505 | -0.9589 | -0.3974 | -0.1449 | -0.5924  | -0.669  | 0.53853 |
| GSMA750 | -0.3625 | -0.5886 | -0.7813 | 1.20725 | -0.2832 | -1.1028  | -1.0293 | -0.2491 | -0.5526 | -0.5416  | -0.8413 | -0.2692 | -0.5884 | 0.01148 | 0.4801  | 0.0283  | 0.0814  | -0.3974 | -0.5609 | -0.5924  | 0.44407 | 3.23527 |
| GSMA750 | 0.82482 | -0.905  | -0.3317 | 0.76483 | -0.2832 | -0.9904  | -0.2073 | -0.4735 | -0.5526 | -0.5416  | -0.8413 | -0.2692 | 1.24813 | -0.5317 | 1.43022 | 0.2176  | -0.9819 | -0.3974 | -0.6123 | -0.5924  | 2.72881 | -0.6354 |
| GSMA750 | -0.3625 | -0.905  | 1.0809  | -0.2923 | 2.23383 | -1.1028  | 1.52848 | -0.4735 | -0.5526 | 0.3484   | 0.01629 | -0.2692 | 0.17497 | -1.1607 | 0.32427 | 0.07062 | -0.7967 | -0.3974 | -0.3043 | -0.5924  | 1.9489  | 3.36271 |
| GSMA750 | -0.3625 | -0.905  | 1.13247 | -0.5874 | -0.2832 | -0.1152  | 0.88639 | 1.03044 | -0.5526 | -0.5416  | -0.1345 | -0.2692 | -0.5603 | 0.94724 | 0.02604 | -0.1495 | -0.7791 | -0.3974 | 0.1158  | 0.31667  | -0.669  | 1.39639 |
| GSMA750 | 0.87158 | -0.905  | -0.0671 | 0.21981 | 1.64436 | -1.1028  | -0.6335 | -0.4735 | -0.5526 | 0.41071  | 0.31161 | 1.92499 | -0.2841 | -1.3005 | 0.70783 | 1.81288 | -0.9589 | -0.3974 | 0.44324 | -0.4885  | 0.14784 | 0.89922 |
| GSMA750 | -0.3625 | -0.4366 | -0.8887 | 0.05727 | -0.2832 | -1.1028  | 0.2798  | 0.70453 | -0.5526 | -0.285   | -0.7334 | -0.2692 | 0.21959 | -0.584  | 0.01277 | 2.56553 | -0.9589 | -0.3974 | 0.27191 | -0.0989  | -0.2956 | 1.0937  |
| GSMA750 | -0.3625 | -0.9005 | 0.10195 | -0.1584 | 0.70977 | -1.1028  | 0.51394 | 1.13334 | -0.5526 | -0.54    | -0.211  | -0.2692 | -0.4841 | 0.74942 | 0.69723 | 1.41735 | -0.9589 | -0.3974 | 0.3405  | 0.44753  | -0.669  | 1.09772 |
| GSMA750 | 0.48959 | -0.905  | -0.4058 | -0.0703 | -0.2832 | -0.731   | -0.0786 | -0.4735 | -0.5526 | -0.5416  | 2.88586 | -0.2692 | -1.5147 | 0.5739  | 1.83408 | -0.5036 | 1.98819 | 0.41165 | 0.12527 | 0.49963  | 0.34311 | -0.4346 |
| GSMA750 | -0.3625 | -0.905  | 1.35196 | 0.01899 | 2.97843 | -0.9982  | 0.20433 | 0.5731  | -0.5526 | 0.50942  | -0.7039 | 0.08411 | 0.09952 | 0.34025 | -0.1546 | 0.45219 | -0.9589 | -0.3974 | -0.6123 | -0.5924  | 0.7545  | 0.55273 |
| GSMA750 | -0.3625 | -0.4047 | 0.8987  | -0.8173 | -0.2832 | -0.1585  | 0.33126 | 1.3582  | -0.5526 | -0.5416  | 0.15583 | -0.2692 | -0.9938 | 2.11409 | 0.67609 | -0.1305 | -0.9589 | -0.3974 | -0.0666 | 0.40328  | -0.669  | 0.59215 |
| GSMA750 | 1.4638  | -0.905  | 0.8049  | -1.3422 | 2.49736 | -0.06059 | 2.0534  | 0.19166 | -0.5526 | 0.20447  | 0.62757 | -0.2692 | -0.0485 | 2.22902 | -0.1087 | -0.5036 | -0.4735 | -0.3974 | -0.6123 | 0.4277   | 1.45568 | -0.495  |
| GSMA750 | -0.3625 | -0.7299 | -0.8941 | -0.2183 | 1.61022 | -1.1028  | -0.3495 | -0.7476 | -0.5526 | -0.26194 | -0.8413 | -0.2692 | 1.10119 | 0.6975  | 0.24272 | 1.32186 | -0.9589 | -0.3974 | 0.67968 | -0.5924  | 0.23776 | 1.23252 |
| GSMA750 | -0.3625 | -0.5064 | -0.4411 | 0.87738 | -0.2832 | -0.7756  | -0.5989 | -0.4735 | -0.5526 | 0.83437  | -1.3917 | -0.2692 | -1.4127 | -0.0606 | 0.46109 | 0.77709 | 1.05503 | 2.73053 | -0.0839 | -0.5508  | 0.98403 | -0.1862 |
| GSMA750 | -0.3625 | -0.8142 | 0.53087 | -0.6631 | -0.2832 | -0.901   | -0.515  | 1.58406 | -0.5526 | -0.3268  | -0.7382 | -0.2692 | -0.306  | 1.44519 | 1.56893 | -0.5036 | -0.1565 | -0.3974 | -0.3257 | -0.5924  | 1.91908 | 1.32626 |
| GSMA750 | 1.30512 | -0.905  | 0.08152 | -0.1458 | 1.1379  | -1.1028  | 0.23646 | -0.3233 | -0.5526 | -0.2503  | 0.45414 | -0.2692 | 1.2632  | -0.8222 | 0.79852 | 0.02349 | -0.6458 | -0.3974 | -0.1357 | -0.4331  | -0.6243 | -0.346  |
| GSMA750 | -0.3625 | -0.6284 | -0.3401 | -0.3393 | -0.2832 | -1.1028  | -0.3401 | 3.1146  | -0.5526 | -0.5416  | -0.0858 | -0.2692 | 0.18515 | 0.40039 | 0.49745 | 0.40944 | -0.9589 | -0.3974 | 0.28172 | -0.5623  | -0.669  | 1.34163 |
| GSMA750 | 0.44656 | -0.905  | -0.4668 | 0.26542 | -0.2832 | -1.1028  | 1.38336 | 2.23877 | -0.5526 | -0.4963  | 0.33434 | 2.04505 | -0.8905 | -0.3054 | 1.43198 | 1.74499 | -0.9589 | -0.3974 | 1.1707  | -0.0862  | -0.669  | 0.04676 |
| GSMA750 | -0.3625 | -0.905  | 1.13247 | -0.5874 | -0.2832 | -0.1152  | 0.88639 | 1.03044 | -0.5526 | -0.5416  | -0.1345 | -0.2692 | -0.5603 | 0.94724 | 0.02604 | -0.1495 | -0.7791 | -0.3974 | 0.1158  | 0.31667  | -0.669  | 1.39639 |
| GSMA750 | 0.31039 | -0.905  | -0.2493 | 0.43154 | 0.97332 | -1.1028  | 0.68464 | -0.4735 | -0.5526 | -0.4389  | 0.33256 | -0.2692 | -0.0816 | 0.7501  | -0.3035 | 0.21022 | -0.9589 | -0.3974 | 0.05628 | -0.0446  | -0.3132 | 1.7271  |
| GSMA750 | -0.3625 | -0.4893 | 0.28302 | -0.6967 | -0.2832 | -0.5077  | 0.85464 | -0.4735 | -0.5526 | -0.0395  | -0.4411 | -0.2692 | -0.925  | 1.12382 | 0.22109 | -0.5036 | 0.79273 | -0.3974 | -0.444  | 0.02561  | -0.0756 | 1.61221 |
| GSMA750 | -0.3625 | -0.353  | 0.17647 | 0.6228  | 0.88343 | -0.8049  | -0.464  | 2.675   | -0.5526 | -0.5114  | -0.2614 | -0.2692 | -0.4441 | 0.63419 | 0.28179 | -0.3198 | -0.8002 | -0.3974 | 0.11004 | -0.5924  | -0.669  | 1.49828 |
| GSMA750 | 0.41482 | -0.905  | -0.4638 | 1.30224 | -0.2832 | -0.753   | 1.22652 | -0.4735 | -0.5526 | 1.16652  | 2.58107 | -0.2692 | -1.5147 | 0.6775  | 0.75484 | 0.39784 | -0.9589 | -0.3974 | -0.1683 | -0.5924  | 3.01281 | -0.1818 |
| GSMA750 | -0.2138 | -0.905  | 1.64019 | -1.2667 | -0.2832 | -0.7288  | 1.4874  | 2.48717 | -0.5526 | 2.40873  | 1.17453 | -0.2692 | -1.0637 | 1.66545 | -0.1007 | -0.3537 | -0.8682 | -0.3974 | -0.4516 | -0.17864 | -0.669  | -0.032  |
| GSMA750 | -0.3625 | -0.4925 | 0.5554  | -0.5198 | -0.2832 | -1.051   | 2.4699  | 4.19933 | -0.5526 | 1.30121  | 0.35381 | 4.2638  | -0.6213 | 0.56068 | -0.2823 | -0.2762 | -0.8339 | -0.3974 | -0.133  | -0.5924  | -0.669  | 0.5573  |
| GSMA750 | 0.3625  | -0.905  | 1.13247 | -0.5874 | -0.2832 | -0.1152  | 0.88639 | 1.03044 | -0.5526 | -0.5416  | -0.1345 | -0.2692 | -0.5603 | 0.94724 | 0.02604 | -0.1495 | -0.7791 | -0.3974 | 0.1158  | 0.31667  | -0.669  | 1.39639 |
| GSMA750 | -0      |         |         |         |         |          |         |         |         |          |         |         |         |         |         |         |         |         |         |          |         |         |

|         |         |         |          |          |         |         |         |         |         |         |         |         |          |         |         |         |          |         |         |         |         |         |         |
|---------|---------|---------|----------|----------|---------|---------|---------|---------|---------|---------|---------|---------|----------|---------|---------|---------|----------|---------|---------|---------|---------|---------|---------|
| GSM4750 | -0.3625 | -0.5723 | 2.65028  | -1.5382  | -0.2832 | 0.41625 | -0.0535 | 5.23378 | -0.5526 | -0.5416 | 0.66839 | -0.1832 | -1.3974  | 1.53042 | -0.5805 | 0.11908 | -0.9589  | -0.3974 | -0.6123 | 0.84933 | -0.669  | -0.0439 |         |
| GSM4750 | -0.3625 | -0.905  | 0.94753  | -0.372   | 2.04747 | -1.1028 | 0.38281 | -0.4735 | -0.5526 | -0.5416 | 0.25109 | -0.2692 | -0.0294  | 2.10319 | -0.1372 | 0.14069 | -0.9589  | -0.3974 | 0.34098 | 0.42359 | 0.42914 | 0.31935 |         |
| GSM4750 | 0.10449 | -0.905  | -0.10449 | 1.23207  | -0.2832 | -1.1028 | -0.5439 | 0.05223 | -0.5526 | 2.53035 | -0.2708 | -0.2692 | 0.09812  | -0.5036 | 0.43001 | -0.5036 | 0.83626  | -0.3974 | -0.2003 | -0.5924 | 0.19558 | 0.78362 |         |
| GSM4750 | 0.3625  | -0.6779 | -0.7426  | -0.2832  | -1.0446 | 0.44432 | -0.2068 | -0.5526 | -0.5416 | 1.83654 | 0.30947 | -0.7789 | 1.85599  | 0.65559 | -0.5036 | -0.485  | -0.3974  | 0.11437 | -0.3974 | 2.7195  | 0.31775 |         |         |
| GSM4750 | 2.43667 | -0.905  | 1.0809   | 0.12556  | 2.26961 | -1.101  | -0.4506 | 0.4735  | -0.5526 | 0.02324 | -0.2139 | -0.2692 | -0.2764  | -0.954  | 0.01719 | 0.33005 | -0.9589  | -0.3974 | -0.6123 | -0.5924 | 2.33497 | 2.57909 |         |
| GSM4750 | -0.3625 | -0.2317 | -1.0809  | 0.20149  | -0.2832 | -1.1028 | 0.28212 | -0.4735 | -0.5526 | 2.01799 | -0.064  | 0.88138 | 0.32406  | -0.341  | 0.71252 | 1.12226 | -0.9589  | 0.00915 | -0.1019 | -0.5924 | 0.67021 | 1.05389 |         |
| GSM4750 | -0.3625 | -0.8427 | -0.6497  | 1.1554   | -0.2832 | -0.6708 | -0.144  | 0.39726 | -0.5526 | -0.5416 | -0.0044 | -0.2692 | -0.0768  | 0.38702 | -0.3212 | 1.30241 | -0.9589  | -0.3974 | -0.1724 | -0.4003 | -0.3985 | 1.48227 |         |
| GSM4750 | -0.1843 | -0.8868 | -0.6385  | -0.2148  | 2.01166 | -1.1028 | 0.87275 | -0.4735 | -0.5526 | -0.5416 | -0.4537 | -0.2692 | 0.86467  | 1.12298 | 1.14045 | -0.5036 | -0.2411  | -0.3974 | -0.6123 | -0.2523 | -0.2123 | 0.53124 |         |
| GSM4750 | 0.18681 | -0.8039 | -0.852   | -0.5495  | -0.2832 | -0.7853 | 3.77484 | -0.4735 | -0.5526 | -0.3582 | -0.2743 | -0.2692 | -0.1694  | 0.09921 | 1.31783 | -0.3388 | -0.651   | -0.3974 | -0.1618 | 0.3569  | -0.5033 | 1.45704 |         |
| GSM4750 | -0.3625 | -0.905  | 0.02626  | 0.12384  | 1.39791 | -1.1028 | -0.1989 | 0.72993 | -0.5526 | -0.5416 | -0.6695 | -0.2692 | 0.6662   | 0.31918 | -0.2767 | -0.5036 | -0.391   | -0.3974 | -0.6123 | -0.5661 | 0.75087 | 1.8746  |         |
| GSM4750 | 0.76182 | -0.905  | 0.07628  | -0.1965  | -0.2832 | -0.9633 | 0.10242 | 0.69738 | -0.5526 | -0.2641 | -0.2557 | -0.2692 | 1.67976  | -0.483  | 0.66226 | -0.2132 | -0.5277  | -0.3974 | 0.42234 | -0.5924 | -0.669  | -0.4018 |         |
| GSM4750 | 0.05367 | -0.905  | 0.43046  | 0.25322  | -0.2832 | -0.0456 | 0.85549 | 0.20614 | -0.5526 | 0.84903 | 0.7699  | -0.2692 | -1.5147  | 0.83298 | 2.95234 | 0.19792 | -0.9589  | -0.3974 | -0.061  | -0.4129 | 0.71618 | -0.8464 |         |
| GSM4750 | 0.0497  | -0.905  | 0.15344  | 0.6162   | -0.2832 | -1.1028 | -0.9835 | 2.70056 | -0.5526 | 0.643   | -0.5477 | 2.10592 | -0.2788  | 1.60336 | -0.206  | -0.12   | 0.23053  | -0.3974 | -0.2909 | -0.3772 | -0.669  | 0.42139 |         |
| GSM4750 | -0.3625 | -0.6235 | 1.09238  | -0.1222  | -0.2832 | -0.8585 | -0.4933 | 2.33845 | -0.3984 | -0.5416 | -0.8413 | 0.31717 | -0.069   | 0.4591  | -0.152  | 1.19116 | -0.9589  | -0.3974 | 0.10925 | -0.5924 | -0.5464 | 0.98126 |         |
| GSM4750 | 0.17261 | -0.905  | -1.0809  | 0.19783  | -0.2832 | -1.1028 | -0.0516 | -0.4735 | -0.5526 | 0.16957 | 1.74521 | 0.05979 | 0.34545  | -1.2358 | 0.17022 | 0.42748 | -0.9589  | -0.3974 | 0.21342 | -0.5924 | 1.01525 | -0.253  |         |
| GSM4750 | 1.12942 | -0.905  | -1.0809  | 0.48935  | -0.2832 | -0.6674 | 1.91554 | -0.4735 | 0.24749 | -0.2941 | 0.61882 | -0.2692 | -0.6371  | 0.97154 | 1.04684 | 0.05982 | -0.7452  | -0.3974 | -0.263  | 0.25999 | 0.47707 | 0.22709 |         |
| GSM4750 | -0.3625 | -0.6329 | -0.2817  | 0.34391  | -0.2832 | -1.1028 | -0.4335 | 0.66792 | -0.5526 | -0.5416 | -0.8413 | -0.2692 | 0.046    | 0.01055 | 0.25578 | 2.20031 | -0.9589  | -0.3974 | -0.0512 | -0.5924 | -0.0542 | 1.22725 |         |
| GSM4750 | 0.3625  | -0.6433 | 1.43721  | -1.5382  | 2.31347 | -0.7101 | 0.64893 | 3.06669 | -0.5526 | -0.5416 | -0.5103 | -0.2692 | -0.1478  | 1.49026 | 0.23809 | -0.5036 | -0.5343  | -0.3974 | 0.02805 | -0.2816 | -0.6419 | 0.72119 |         |
| GSM4750 | 0.19292 | -0.905  | -0.6052  | 0.49086  | -0.2832 | -0.8116 | -0.0988 | -0.0941 | -0.5526 | 0.85301 | 0.64507 | -0.2672 | 0.18681  | -0.6482 | 1.13236 | -0.1106 | 0.03576  | -0.3974 | 0.09405 | -0.5924 | 0.48979 | 0.39277 |         |
| GSM4750 | -0.3625 | -0.7619 | 0.31085  | 0.54694  | -0.2832 | -0.769  | -1.1003 | 3.40416 | -0.5526 | -0.5416 | 1.08877 | 1.47061 | 0.14567  | -0.1083 | 0.62659 | -0.5036 | 0.49392  | -0.3974 | -0.3132 | 0.18611 | -0.669  | 0.39403 |         |
| GSM4750 | -0.3625 | -0.892  | 0.88314  | 0.31976  | -0.2832 | -1.0129 | -1.1257 | 1.97408 | -0.5526 | -0.5416 | 0.97906 | 1.23908 | -0.0955  | -0.6353 | 0.78458 | -0.5036 | 0.4651   | -0.3974 | -0.1664 | -0.2303 | -0.669  | 0.90002 |         |
| GSM4750 | -0.3625 | -0.905  | 1.97475  | -1.5382  | 2.98621 | -1.0404 | 0.51975 | 3.71122 | -0.5526 | -0.4341 | -0.2829 | -0.2692 | -0.5977  | 1.51689 | 0.26767 | -0.3659 | -0.7991  | -0.3974 | 0.06462 | -0.1856 | -0.669  | 0.01843 |         |
| GSM4750 | -0.2588 | -0.8919 | 0.15596  | 0.71115  | -0.2832 | -1.0022 | 0.34843 | -0.4051 | -0.5526 | -0.0097 | 1.54212 | -0.129  | -0.2785  | -0.9901 | 1.58958 | -0.5036 | 0.86539  | -0.3974 | 0.3061  | -0.15   | -0.669  | 0.91715 |         |
| GSM4750 | 0.82744 | -0.905  | -1.0809  | 0.5859   | 0.29166 | -1.0891 | -0.6992 | -0.4735 | -0.5526 | -0.3468 | 1.06631 | -0.2692 | -0.15003 | -0.3728 | 0.57146 | -0.1922 | 0.63093  | -0.3974 | -0.6123 | -0.5924 | 2.3866  | 0.37307 |         |
| GSM4750 | -0.3625 | -0.2521 | 0.73447  | 0.38092  | 0.51982 | -1.1028 | 0.30291 | 3.45947 | -0.5526 | -0.5416 | -0.1122 | 0.2826  | -0.8495  | 2.13928 | -0.7098 | -0.3636 | -0.3273  | -0.3974 | -0.1875 | -0.5924 | -0.669  | 0.8164  |         |
| GSM4750 | 0.35859 | -0.905  | -0.0508  | 0.49086  | -0.2832 | -1.1028 | -0.0689 | 0.80951 | -0.5526 | 0.2969  | -0.8413 | -0.2692 | -0.1675  | 0.1798  | -0.762  | 2.18638 | -0.9589  | -0.3974 | -0.6123 | -0.5924 | 0.77618 | 0.39277 |         |
| GSM4750 | 0.44401 | -0.905  | -0.0425  | 0.08291  | -0.2832 | -0.3129 | 0.73341 | 2.36072 | -0.5526 | -0.5416 | -0.3973 | -0.2692 | 0.83298  | 0.9829  | 0.42469 | -0.2662 | -0.9589  | -0.3974 | -0.6123 | -0.5924 | -0.669  | -0.6227 |         |
| GSM4750 | -0.3625 | -0.4686 | -0.444   | 0.15153  | 0.4142  | -1.1028 | 0.73485 | -0.1529 | -0.5526 | -0.3749 | -0.6004 | 0.99974 | 0.43354  | -0.6594 | -0.2709 | 1.06013 | -0.9589  | -0.3974 | -0.0372 | 0.47988 | -0.5924 | 0.71247 | 1.62777 |
| GSM4750 | -0.3625 | -0.3    | 1.10636  | 0.99906  | 0.56248 | -1.1028 | 1.87852 | -0.4735 | -0.5526 | 0.24799 | -0.1656 | -0.2692 | -0.5822  | 0.99349 | -0.6985 | -0.2583 | 0.23179  | 1.57022 | -0.0721 | -0.5924 | 0.35883 | 0.52933 |         |
| GSM4750 | -0.3625 | -0.7993 | 0.65134  | -0.3069  | -0.2832 | -0.7041 | -0.8955 | 3.47588 | -0.5526 | 0.37362 | 0.4402  | -0.2692 | -0.8863  | 1.4149  | 0.30405 | -0.3497 | -0.9545  | -0.3974 | -0.1123 | -0.2123 | -0.669  | 1.28145 |         |
| GSM4750 | -0.3625 | -0.563  | -0.3372  | -1.0269  | 2.95266 | -1.1028 | 0.85562 | 0.77465 | -0.5526 | 0.59778 | -0.7392 | -0.2692 | -0.5371  | 0.86253 | 1.00096 | 0.01999 | -0.9589  | -0.3974 | 0.89627 | -0.1316 | -0.669  | 1.64523 |         |
| GSM4750 | -0.3625 | -0.8476 | -0.3516  | 0.11723  | -0.2832 | 0.07632 | 1.48485 | 0.81902 | -0.5526 | 0.60833 | -0.3029 | -0.2692 | -1.0823  | 0.83024 | 0.94645 | 0.93149 | -0.9589  | -0.3974 | 0.37491 | 0.366   | -0.669  | 0.61075 |         |
| GSM4750 | 1.21761 | -0.905  | -0.0043  | 0.57321  | -0.2832 | -1.1028 | 0.30291 | 3.23723 | -0.5526 | 0.1616  | -0.2692 | -0.2692 | -0.1478  | 0.98775 | -1.251  | 0.11297 | -0.9589  | -0.3974 | -0.6123 | -0.5924 | 0.77618 | 0.39277 |         |
| GSM4750 | -0.3625 | -0.0918 | -0.7433  | 0.59785  | -0.2832 | -1.1028 | -0.5188 | -0.2081 | -0.5526 | -0.5416 | 2.74742 | -0.2692 | -0.9285  | -0.3882 | 1.17594 | -0.5036 | 0.26015  | -0.3974 | -0.1245 | 0.20682 | -0.2481 | 1.62249 |         |
| GSM4750 | 0.24672 | -0.905  | -0.4532  | 0.04293  | -0.2832 | -1.0978 | -0.5736 | 0.33461 | -0.5526 | 1.082   | -0.8413 | -0.2692 | 0.55091  | 1.00789 | 0.70292 | 1.56029 | -0.9589  | -0.3974 | -0.3606 | -0.5924 | 1.07595 | -0.6905 |         |
| GSM4750 | -0.3625 | -0.7712 | -0.2383  | -0.12422 | -0.0398 | -1.1028 | 0.58381 | -0.4149 | -0.5526 | -0.4059 | -0.4465 | -0.2692 | 0.63338  | 0.04408 | 0.3853  | 1.06688 | -0.9589  | -0.3974 | 0.84815 | -0.5924 | 0.6633  | 0.70346 |         |
| GSM4750 | 0.95079 | -0.905  | -1.0809  | 0.17317  | 2.20498 | -1.1028 | 2.3057  | -0.4735 | -0.5526 | 2.12326 | 1.9095  | -0.2692 | 0.01829  | -1.0343 | -0.893  | 1.87795 | -0.9589  | -0.3974 | -0.4135 | -0.5924 | 2.79494 | 1.80888 |         |
| GSM4750 | 1.50324 | -0.905  | 0.06389  | -1.5235  | -0.2832 | -0.9197 | 3.34092 | 2.10935 | -0.5526 | 0.08085 | 0.60622 | -0.2692 | -0.4457  | 0.06354 | 0.43918 | 0.76584 | -0.9589  | -0.3974 | 0.39888 | -0.5924 | -0.669  | 0.64514 |         |
| GSM4750 | -0.3625 | -0.8308 | -0.5966  | -0.221   | 3.80685 | -1.1028 | 0.87331 | 1.29329 | -0.5526 | -0.5416 | -0.8413 | -0.2692 | -0.0197  | 1.78173 | 0.49788 | -0.5036 | -0.2554  | -0.3974 | -0.2416 | -0.5924 | 1.56853 | 0.57891 |         |
| GSM4750 | 0.21671 | -0.905  | -0.0043  | 0.57321  | -0.2832 | -1.1028 | -0.0689 | 0.80951 | -0.5526 | 0.2969  | -0.8413 | -0.2692 | -0.1675  | 0.1798  | -0.762  | 2.18638 | -0.9589  | -0.3974 | -0.6123 | -0.5924 | 0.77618 | 0.39277 |         |
| GSM4750 | -0.3625 | -0.905  | -0.5621  | -1.4268  | 0.58776 | -1.1028 | 0.72774 | 0.69226 | 0.354   | -0.5416 | -0.3973 | -0.2692 | 2.5842   | -0.4955 | -0.4026 | 0.3728  | -0.9589  | -0.3974 | -0.0314 | -0.5924 | 0.05364 | -0.4762 |         |
| GSM4750 | -0.3625 | -0.7574 | 3.11852  | -1.2363  | -0.2832 | -0.4595 | -0.2673 | 1.89371 | -0.5526 | -0.3107 | 0.15995 | 0.14581 | -1.0896  | 2.47021 | -0.147  | -0.2465 | -0.9589  | -0.3974 | -0.373  | -0.5924 | 1.00762 | 0.49027 |         |
| GSM4750 | -0.0862 | -0.905  | -1.0809  | -1.5382  | -0.0285 | 0.27227 | 3.2727  | 1.45959 | 0.61314 | -0.5416 | -0.0118 | 0.71031 | 1.28636  | -0.4767 | 0.89914 | 1.05613 | -0.9589  | 0.00853 | -0.6123 | -0.5924 | -0.669  | -0.6161 |         |
| GSM4750 | -0.3625 | -0.5294 | 1.48879  | -1.2423  | -0.2832 | -0.1897 | -0.1022 | 2.99892 | -0.5526 | -0.5416 | 0.89247 | -0.2692 | -0.5443  | 0.64255 | -0.9564 | -0.5036 | -0.241   | -0.3974 | -0.3099 | -0.5924 | -0.669  | 1.81167 |         |
| GSM4750 | -0.3625 | -0.4236 | 0.32572  | -0.0862  | -0.2832 | -0.4944 | 0.36011 | 1.37638 | -0.5526 | -0.5213 | 0.1551  | -0.2692 | -0.1306  | 0.87301 | -0.3912 | -0.5036 | -0.91722 | -0.3974 | -0.5624 | -0.5924 | -0.669  | 0.94514 |         |
| GSM4750 | 5.53075 | -0.905  | -0.1018  | -0.7969  | 9.88756 | -1.1028 | 0.35246 | -0.4735 | 1.45737 | 0.68601 | 1.48968 | 1.65951 | -1.3384  | -0.8417 | -1.7338 | 0.33882 | -0.9589  | 0.41882 | -0.6123 | -0.5924 | 3.38536 | 1.18104 |         |
| GSM4750 | 0.21671 | -0.905  | -0.0043  | 0.57321  | -0.2832 | -1.1028 | -0.0689 | 0.80951 | -0.5526 | 0.2969  | -0.8413 | -0.2692 | -0.1675  | 0.1798  | -0.762  | 2.18638 | -0.9589  | -0.3974 | -0.6123 | -0.5924 | 0.77618 | 0.39    |         |

**Table-S3: Relative Immune Scores of 792 LUSC patients**

| Tag          | StromalScore | ImmuneScore  | ESTIMATEScore |
|--------------|--------------|--------------|---------------|
| TCGA-34-5234 | 1.025465691  | 1.076242958  | 3828.502618   |
| TCGA-96-7544 | 0.598534772  | -0.003268653 | 2252.850872   |
| TCGA-85-A513 | 0.495060209  | 1.222116877  | 3386.359923   |
| TCGA-85-8584 | -0.380446726 | 0.547142659  | 1723.311156   |
| TCGA-85-A511 | 0.327116712  | -0.029414645 | 1923.88306    |
| TCGA-66-2789 | 0.244808076  | -0.358094693 | 1497.251174   |
| TCGA-22-0940 | 0.111828422  | 0.812043072  | 2541.593667   |
| TCGA-96-A4JL | 0.1076451    | 1.162917858  | 2894.503436   |
| TCGA-77-8136 | 0.428599883  | 0.730273962  | 2811.104918   |
| TCGA-63-5131 | -0.883969511 | -0.806407856 | -216.921083   |
| TCGA-90-7964 | -0.227792951 | -0.309654644 | 1020.201919   |
| TCGA-85-A5B5 | -0.891543263 | -1.250761623 | -678.1891858  |
| TCGA-37-3789 | -0.416986635 | 0.21692942   | 1346.096987   |
| TCGA-O2-A5IB | -1.570660881 | -2.08621223  | -2286.025109  |
| TCGA-58-8390 | -0.023348336 | -0.596680061 | 955.4237101   |
| TCGA-66-2777 | -0.126807561 | 0.243140757  | 1696.028618   |
| TCGA-77-8140 | -1.323314124 | -1.199890821 | -1107.282037  |
| TCGA-98-A538 | -0.489002918 | -0.554821891 | 479.4043935   |
| TCGA-66-2785 | -0.132727824 | 0.911940642  | 2370.994732   |
| TCGA-43-5670 | -1.272947118 | -1.714581908 | -1575.691329  |
| TCGA-22-5472 | -0.434718161 | -0.196264599 | 905.2687715   |
| TCGA-60-2704 | 1.105030081  | 0.851411568  | 3688.005433   |
| TCGA-77-6843 | -1.438329101 | -1.744074934 | -1789.960206  |
| TCGA-63-A5MG | -0.304797375 | -0.015659168 | 1234.034284   |
| TCGA-66-2734 | 0.162883304  | 0.247694386  | 2023.345517   |
| TCGA-43-2581 | 0.473038655  | 0.868824681  | 3001.797937   |
| TCGA-52-7811 | -0.1761049   | -0.288678156 | 1099.152123   |
| TCGA-85-8287 | 0.712496688  | 0.688580024  | 3084.838054   |
| TCGA-85-8355 | 0.115381596  | 1.435190236  | 3180.588139   |
| TCGA-94-7033 | -1.614055326 | -0.99227335  | -1219.549575  |
| TCGA-60-2697 | 0.641146165  | 1.445288343  | 3776.509435   |
| TCGA-77-8145 | 0.24544599   | -0.902183456 | 943.4918304   |
| TCGA-85-7844 | 0.195454911  | -0.395851406 | 1403.801328   |
| TCGA-39-5040 | -0.931924102 | -1.059487971 | -528.244847   |
| TCGA-66-2795 | 0.374061953  | 0.096178496  | 2104.163139   |
| TCGA-33-4586 | -0.760956839 | -1.162556012 | -442.8450363  |
| TCGA-NC-A5HH | -1.278844409 | -1.232179538 | -1090.653576  |
| TCGA-22-1002 | 0.270774667  | 0.091735135  | 1984.586952   |
| TCGA-60-2695 | -0.516915499 | -0.357723574 | 649.172482    |
| TCGA-77-A5G8 | -0.562302211 | -0.522301639 | 430.8996416   |
| TCGA-63-A5MP | -0.443857534 | 0.382288318  | 1484.680366   |
| TCGA-22-0944 | -1.131422137 | -1.285530883 | -980.8144141  |
| TCGA-21-1081 | -0.306832079 | -1.275843898 | -52.46096322  |
| TCGA-O2-A52V | -0.437840791 | -0.274951442 | 821.6024072   |
| TCGA-33-AASB | -1.995017502 | -1.724641281 | -2390.23124   |
| TCGA-63-5128 | -0.760629087 | -1.419406739 | -704.2313646  |
| TCGA-96-8170 | -0.367921953 | -0.194050845 | 981.926691    |
| TCGA-63-A5MW | -0.030886012 | -1.303295241 | 226.93047     |
| TCGA-37-3792 | 0.346164296  | 1.422398774  | 3424.613287   |
| TCGA-56-A4BX | -1.9824549   | -2.156521287 | -2816.358414  |
| TCGA-56-8083 | -1.043036121 | -2.128409309 | -1741.324782  |
| TCGA-98-A53H | 0.768494334  | 0.983950962  | 3448.218418   |
| TCGA-94-A4VJ | -0.52197128  | -0.567111322 | 430.1581923   |
| TCGA-43-7658 | -1.392097238 | -0.120770574 | -84.1874108   |
| TCGA-NC-A5HN | -1.475708927 | -1.365560636 | -1445.859974  |
| TCGA-63-7021 | -0.073979595 | 0.147910483  | 1657.824564   |



|              |              |              |              |
|--------------|--------------|--------------|--------------|
| TCGA-22-5471 | -0.379255479 | 0.366317616  | 1540.362886  |
| TCGA-77-8133 | -0.567055656 | 0.439610823  | 1405.870555  |
| TCGA-37-A5EM | 0.450198965  | 0.175942689  | 2270.25554   |
| TCGA-85-8071 | -1.227054346 | -1.10876815  | -907.2004027 |
| TCGA-NC-A5HP | -0.136495767 | -1.277707251 | 135.3717127  |
| TCGA-85-A4PA | -0.106647877 | 2.089261427  | 3599.828148  |
| TCGA-33-4582 | -1.262863972 | -1.349883231 | -1192.802996 |
| TCGA-43-2578 | -0.648921564 | -0.496443377 | 360.7690491  |
| TCGA-34-A5IX | -1.093832782 | -0.598315952 | -238.6180761 |
| TCGA-56-8504 | -0.288577094 | -0.276462679 | 986.3218783  |
| TCGA-18-5595 | -1.244101872 | -1.663562586 | -1491.568868 |
| TCGA-21-5784 | -1.32E-01    | 0.377518799  | 1826.966417  |
| TCGA-90-A4ED | -0.332468985 | -0.68571269  | 520.3738181  |
| TCGA-MF-A522 | -1.485677393 | -1.373119074 | -1464.666148 |
| TCGA-46-3768 | -0.795944832 | -0.823229675 | -136.0162898 |
| TCGA-77-7335 | 1.391190939  | 1.170692668  | 4332.122806  |
| TCGA-56-A4BY | -0.88547875  | -0.863088595 | -276.3643698 |
| TCGA-85-8070 | -1.901898515 | -1.943437906 | -2509.480532 |
| TCGA-56-7579 | -0.551940557 | -0.804123671 | 155.2419676  |
| TCGA-NC-A5HG | -1.581851315 | -1.472608101 | -1673.178133 |
| TCGA-56-8305 | -0.531533546 | -1.037616156 | -59.97487197 |
| TCGA-60-2703 | -0.01706485  | -1.053622711 | 496.7616169  |
| TCGA-39-5036 | -1.673381602 | -0.829138379 | -1119.383449 |
| TCGA-33-6737 | -0.192945031 | -0.19990947  | 1170.856878  |
| TCGA-34-2608 | 0.854106886  | 0.647973673  | 3201.191521  |
| TCGA-39-5024 | -1.070244369 | -0.429152103 | -39.9523087  |
| TCGA-77-7142 | -0.43205067  | -0.665429758 | 430.1232356  |
| TCGA-85-8350 | -0.139633451 | -0.296440629 | 1131.865797  |
| TCGA-O2-A52Q | -0.017249573 | 0.936456627  | 2524.60561   |
| TCGA-68-8250 | -0.453836373 | -0.082930525 | 999.4701437  |
| TCGA-70-6723 | -1.590652849 | -1.674294129 | -1888.516017 |
| TCGA-68-8251 | 0.257681447  | -0.013211733 | 1863.05364   |
| TCGA-85-7697 | -0.412143576 | -0.337053792 | 786.9383709  |
| TCGA-66-2756 | -0.723149357 | -0.932961337 | -166.7573158 |
| TCGA-85-6561 | 0.980539883  | 0.662260801  | 3356.58048   |
| TCGA-94-7943 | -0.866914366 | -0.653297489 | -41.89227222 |
| TCGA-22-1011 | -0.065339455 | 0.623979876  | 2152.601235  |
| TCGA-85-8664 | -1.820663966 | -1.480683824 | -1947.412887 |
| TCGA-63-A5MH | -0.906164862 | -1.34464821  | -790.1535952 |
| TCGA-94-8490 | -1.431298492 | -1.677315784 | -1714.096155 |
| TCGA-85-8481 | 0.183232769  | -0.150626776 | 1640.090996  |
| TCGA-60-2716 | -1.554604552 | -1.815371246 | -1992.131944 |
| TCGA-O2-A52S | -1.083650533 | -0.317709547 | 58.68390309  |
| TCGA-51-4080 | -1.242493257 | -1.297735261 | -1116.969833 |
| TCGA-22-5485 | -0.768178252 | -0.844256454 | -126.5160465 |
| TCGA-85-6175 | 1.249568546  | 0.623461846  | 3616.702739  |
| TCGA-85-8276 | 0.560406752  | 0.473797987  | 2696.55042   |
| TCGA-77-8008 | 1.135210501  | 0.3714328    | 3232.485643  |
| TCGA-39-5028 | 0.13923723   | 0.052031595  | 1797.610986  |
| TCGA-34-5928 | 0.739778024  | -0.280374895 | 2127.783336  |
| TCGA-43-6773 | 0.838944505  | 1.033994407  | 3577.688632  |
| TCGA-63-A5MI | -1.17441083  | -1.545608611 | -1293.737967 |
| TCGA-63-A5ML | -0.551041168 | -0.707303248 | 254.911507   |
| TCGA-39-5030 | 0.705882363  | 1.352794155  | 3754.357827  |
| TCGA-51-4079 | -0.323237184 | -0.346255096 | 876.5911865  |
| TCGA-22-5491 | -1.410210588 | -0.895683633 | -894.0615115 |
| TCGA-66-2744 | 0.339818815  | 1.242565493  | 3234.280809  |
| TCGA-33-4547 | -0.236255275 | -0.408877137 | 909.6603933  |

|              |              |              |              |
|--------------|--------------|--------------|--------------|
| TCGA-52-7810 | -0.860790244 | -1.364342798 | -759.6827748 |
| TCGA-77-7139 | -0.769211515 | -0.923878984 | -208.8086784 |
| TCGA-66-2800 | -0.09478775  | 0.145304896  | 1631.991796  |
| TCGA-33-4566 | -0.345401202 | 0.416629499  | 1629.343791  |
| TCGA-90-7766 | -0.984018553 | 0.212506831  | 709.9932593  |
| TCGA-60-2707 | 0.224475642  | -0.184582114 | 1651.426769  |
| TCGA-56-8628 | 0.330686389  | 0.57522069   | 2544.030881  |
| TCGA-85-8666 | 0.19535043   | -0.081605873 | 1723.92624   |
| TCGA-60-2721 | 0.045795669  | 0.499879914  | 2149.922939  |
| TCGA-22-4596 | 0.896317535  | 1.407394838  | 4022.119274  |
| TCGA-33-A5GW | -1.663732618 | -1.677496318 | -1973.180268 |
| TCGA-60-2715 | 1.007280345  | 0.927548246  | 3656.714821  |
| TCGA-85-8351 | -0.681416568 | -0.705960136 | 111.0597088  |
| TCGA-58-A46M | -0.840818964 | -0.134830896 | 515.5333289  |
| TCGA-37-4129 | -1.239574923 | -2.055291471 | -1885.729473 |
| TCGA-21-1075 | -1.343705296 | -1.844400925 | -1786.802298 |
| TCGA-43-7656 | -0.090858776 | 0.538176408  | 2036.735583  |
| TCGA-58-8388 | 0.089264734  | 0.112345983  | 1803.413571  |
| TCGA-98-A53J | -1.239306093 | -1.204506216 | -1018.411924 |
| TCGA-85-7696 | -0.529269532 | -0.720546741 | 265.665985   |
| TCGA-34-5231 | -0.75985464  | -0.523580758 | 209.5494687  |
| TCGA-34-5929 | -0.612780044 | -0.544849088 | 351.6965223  |
| TCGA-22-5492 | -0.090780824 | 0.640593598  | 2141.193706  |
| TCGA-98-A53C | 1.003498559  | 1.560443192  | 4297.47291   |
| TCGA-94-8491 | -0.814272196 | 0.067727137  | 751.5256427  |
| TCGA-90-7767 | 0.343819475  | 0.284381201  | 2262.270698  |
| TCGA-96-8169 | -0.216924423 | -0.163677923 | 1181.069921  |
| TCGA-34-2596 | -0.440841875 | -0.296373409 | 796.428912   |
| TCGA-56-A62T | -0.450835192 | -0.652174585 | 422.707903   |
| TCGA-21-1071 | -0.188850443 | -0.373258574 | 998.7611144  |
| TCGA-22-5480 | -0.249783306 | 0.526066723  | 1847.374446  |
| TCGA-77-A5GH | 0.237583551  | 0.925908807  | 2797.706125  |
| TCGA-L3-A4E7 | -0.579201473 | -0.198880471 | 741.6681489  |
| TCGA-60-2723 | -0.027081028 | 0.295027945  | 1859.987657  |
| TCGA-37-3783 | 0.123468053  | 0.755313173  | 2496.746342  |
| TCGA-66-2763 | -0.623775803 | -0.431092818 | 455.3754583  |
| TCGA-63-6202 | 0.426532737  | 1.116402916  | 3202.298632  |
| TCGA-L3-A524 | -0.759368915 | -1.2870164   | -567.9113781 |
| TCGA-98-8021 | -0.296556857 | -0.820011347 | 423.5140096  |
| TCGA-77-A5GF | -0.577623262 | -0.665158168 | 268.2518568  |
| TCGA-66-2787 | -0.101242217 | 0.201973846  | 1682.55258   |
| TCGA-77-8138 | 0.023594205  | -0.05752245  | 1557.155999  |
| TCGA-63-A5MR | -1.057478832 | -0.786482338 | -389.8812712 |
| TCGA-66-2768 | -0.665640917 | 0.127360075  | 977.851482   |
| TCGA-77-8146 | -0.515778001 | -0.564540204 | 439.6768405  |
| TCGA-43-A56V | -0.848762092 | -0.867840202 | -240.3092521 |
| TCGA-22-1005 | 0.500729345  | 1.53453317   | 3711.05172   |
| TCGA-66-2780 | 0.063313958  | -0.225556691 | 1430.158116  |
| TCGA-77-8156 | 0.227028796  | 0.763493481  | 2620.435371  |
| TCGA-66-2790 | -0.089698054 | -0.1199771   | 1367.317492  |
| TCGA-98-8022 | -0.231399048 | 0.122452117  | 1456.536508  |
| TCGA-58-A46L | -0.324387174 | -0.235944092 | 987.7259763  |
| TCGA-O2-A52N | -0.746037753 | -0.360205128 | 391.4324219  |
| TCGA-63-7022 | 1.18948229   | 1.029190815  | 3963.245004  |
| TCGA-37-4135 | -0.648182328 | -0.281967532 | 580.1604697  |
| TCGA-66-2727 | -0.489387005 | -0.321037618 | 717.2214142  |
| TCGA-34-7107 | 0.243194448  | -0.65217267  | 1195.764871  |
| TCGA-NC-A5HD | -1.375497688 | -1.801573286 | -1778.569933 |

|              |              |              |              |
|--------------|--------------|--------------|--------------|
| TCGA-56-7582 | -0.509233472 | -0.589630584 | 421.3974598  |
| TCGA-18-3415 | 0.000594676  | 0.120508611  | 1712.965507  |
| TCGA-56-7580 | -0.761493562 | -0.792771793 | -66.60322727 |
| TCGA-33-AASL | -1.442896861 | -0.556796864 | -585.1169161 |
| TCGA-43-2576 | 0.583600147  | 0.631943986  | 2883.548121  |
| TCGA-77-A5FZ | 1.132066428  | 2.03195983   | 4921.193206  |
| TCGA-33-4583 | -1.270133153 | -0.561827384 | -397.8080458 |
| TCGA-46-6026 | -1.547557067 | -1.460578977 | -1622.720348 |
| TCGA-18-3414 | -0.431176163 | -0.270558195 | 833.5029711  |
| TCGA-63-A5MY | -2.013117514 | -1.998423609 | -2689.398255 |
| TCGA-56-8082 | -1.142365034 | -1.396746892 | -1106.341313 |
| TCGA-60-2712 | 0.559858756  | 1.173126388  | 3408.611507  |
| TCGA-60-2698 | -0.074610437 | 0.613986711  | 2132.090783  |
| TCGA-52-7809 | -0.951099625 | -1.073871886 | -564.2621402 |
| TCGA-34-5232 | -0.675741414 | 0.807023032  | 1659.231719  |
| TCGA-18-4083 | -0.225715623 | -0.615814199 | 710.5147473  |
| TCGA-37-A5EN | -1.047951346 | -0.745504679 | -337.5094363 |
| TCGA-85-A510 | -0.601216364 | -0.028558129 | 890.718608   |
| TCGA-60-2720 | -0.206349421 | 0.365389178  | 1732.010662  |
| TCGA-60-2710 | -0.07012645  | 0.016629333  | 1528.330471  |
| TCGA-94-8035 | -1.240324448 | -1.104517664 | -917.6499144 |
| TCGA-22-4593 | 0.166088882  | -1.079838331 | 674.0542573  |
| TCGA-18-3419 | -0.976995543 | 0.041951235  | 544.0061711  |
| TCGA-66-2793 | -1.736304752 | -1.91913874  | -2300.268719 |
| TCGA-21-1079 | 0.088224725  | -0.724802118 | 949.1343818  |
| TCGA-92-8064 | 0.390439822  | 0.94973276   | 2992.245816  |
| TCGA-63-7023 | -0.907736685 | -0.82370019  | -261.0167647 |
| TCGA-60-2706 | -0.290515537 | 0.359117018  | 1631.869177  |
| TCGA-98-7454 | 1.210013697  | 1.187161064  | 4147.098508  |
| TCGA-37-4141 | -0.413420664 | -0.193339431 | 931.9722782  |
| TCGA-22-5477 | -1.009830072 | -0.881568355 | -433.7072504 |
| TCGA-33-4533 | -0.255965975 | -1.239315306 | 41.42253928  |
| TCGA-77-8128 | -0.347806922 | -1.842208071 | -675.2717043 |
| TCGA-56-8309 | 0.405294493  | 1.458363863  | 3527.127616  |
| TCGA-56-A5DR | -0.42083098  | -0.683931589 | 423.7656072  |
| TCGA-37-4130 | -0.264922177 | 1.378773673  | 2699.488263  |
| TCGA-58-A46J | -0.568734235 | -0.189778445 | 762.6029249  |
| TCGA-43-6143 | -0.454766396 | -1.214256769 | -154.4775534 |
| TCGA-77-A5G6 | -1.270056515 | -1.280201101 | -1129.802861 |
| TCGA-39-5031 | -0.092376174 | -0.034523902 | 1451.418062  |
| TCGA-90-A59Q | 0.108483961  | 1.139325003  | 2871.394811  |
| TCGA-68-7755 | -0.392078166 | -1.340891973 | -213.7027399 |
| TCGA-66-2767 | 0.305379212  | 1.241848909  | 3195.189499  |
| TCGA-66-2771 | -0.006861092 | 1.02561288   | 2627.034312  |
| TCGA-85-6560 | 0.327738037  | 0.08722643   | 2043.441701  |
| TCGA-56-8304 | -1.244057418 | -0.461441911 | -266.4623961 |
| TCGA-56-7221 | -1.418467126 | -1.447760035 | -1465.868113 |
| TCGA-18-3421 | -0.553400749 | 0.030926595  | 1004.598411  |
| TCGA-51-6867 | -0.508272571 | -0.586144045 | 426.0208341  |
| TCGA-NC-A5HL | -0.857783769 | 0.241291729  | 879.935822   |
| TCGA-77-A5G1 | -0.26467833  | 0.058919243  | 1354.722823  |
| TCGA-96-7545 | 0.179857026  | 0.328405408  | 2124.50292   |
| TCGA-NC-A5HM | -1.327556108 | -0.627393722 | -528.586774  |
| TCGA-33-4589 | -0.426096758 | 0.401897996  | 1524.447293  |
| TCGA-85-A4QR | -2.240102839 | -2.00716949  | -2951.141914 |
| TCGA-60-2711 | -1.117592389 | -0.636719359 | -304.2191986 |
| TCGA-33-4532 | -1.520646959 | -1.459354342 | -1591.498133 |
| TCGA-NC-A5HJ | -0.07531946  | 1.071201586  | 2597.239494  |

|              |              |              |              |
|--------------|--------------|--------------|--------------|
| TCGA-21-5787 | -0.076986682 | 0.659947707  | 2176.281894  |
| TCGA-85-8479 | -1.222625147 | -1.514106294 | -1315.338809 |
| TCGA-34-5240 | -0.094957645 | -0.633517072 | 838.1207834  |
| TCGA-77-8148 | -0.319480509 | -0.830576227 | 387.2137095  |
| TCGA-56-8626 | -0.447024901 | -0.621228663 | 458.4884154  |
| TCGA-33-A4WN | -1.103013923 | -0.909978161 | -566.4532997 |
| TCGA-39-5027 | -1.875687504 | -1.669740129 | -2201.365128 |
| TCGA-56-8503 | 0.948596275  | 0.597748003  | 3255.255934  |
| TCGA-56-8623 | 0.80265673   | 1.566976848  | 4080.420631  |
| TCGA-77-6845 | -1.141928717 | -1.808257073 | -1525.217047 |
| TCGA-85-A50Z | -0.971546486 | -0.113623078 | 391.5330352  |
| TCGA-77-8144 | -1.108975132 | -0.850646854 | -512.6299402 |
| TCGA-85-A53L | -0.876871465 | -0.971289483 | -377.0423642 |
| TCGA-XC-AA0X | -0.279532459 | 0.316572654  | 1600.746734  |
| TCGA-66-2782 | 0.113764197  | 0.44834864   | 2173.116191  |
| TCGA-68-A59I | 0.114978828  | 0.118895133  | 1838.729696  |
| TCGA-77-A5G7 | -1.517395005 | -1.329890131 | -1455.941527 |
| TCGA-90-A4EE | 0.387485817  | 1.424555057  | 3472.837289  |
| TCGA-98-8023 | 0.386182896  | 0.55795417   | 2588.250512  |
| TCGA-34-8456 | -0.659931382 | -0.745519003 | 94.67765098  |
| TCGA-56-5897 | 0.969634468  | 0.617896064  | 3299.222115  |
| TCGA-66-2786 | -0.282955158 | 0.155438561  | 1432.725805  |
| TCGA-39-5037 | -2.077191141 | -1.805462474 | -2564.124792 |
| TCGA-56-6545 | 0.95940524   | 0.567335519  | 3236.302908  |
| TCGA-NK-A5CT | -1.365318377 | -0.685914235 | -630.2859023 |
| TCGA-22-1016 | 0.471527978  | 0.370213839  | 2491.990986  |
| TCGA-39-5016 | -0.925226359 | 0.264208168  | 828.1675918  |
| TCGA-63-A5MM | 0.444132406  | 0.753976437  | 2852.56076   |
| TCGA-33-4538 | -1.000256873 | -0.859714626 | -400.7733083 |
| TCGA-63-A5MT | -0.02846392  | 0.019670133  | 1577.835705  |
| TCGA-18-3416 | -0.607403701 | 0.862869933  | 1792.263127  |
| TCGA-66-2753 | -0.214352986 | -0.397576477 | 945.5728518  |
| TCGA-63-7020 | -0.530223751 | 0.048425844  | 1048.247579  |
| TCGA-56-8308 | -0.310705676 | -0.483705012 | 750.4771498  |
| TCGA-18-3408 | -0.174404787 | -0.150088682 | 1242.279558  |
| TCGA-NK-A5D1 | -1.346620595 | -1.469319656 | -1407.811784 |
| TCGA-85-6798 | -0.337000031 | -1.408308882 | -221.0563712 |
| TCGA-22-4599 | -0.084203178 | 0.828658941  | 2340.173913  |
| TCGA-56-A4ZK | -0.47934305  | 0.182347235  | 1241.39838   |
| TCGA-56-7731 | 0.343915835  | 0.340684384  | 2319.75547   |
| TCGA-92-7341 | -0.080345075 | -0.808446778 | 676.1298696  |
| TCGA-85-8353 | 0.463346061  | 0.150547669  | 2259.020071  |
| TCGA-85-A4QQ | -1.341983268 | -1.047909865 | -973.1962033 |
| TCGA-77-6842 | 0.039704245  | 0.942373853  | 2594.074575  |
| TCGA-22-4595 | 0.146415288  | 0.066059315  | 1819.901737  |
| TCGA-33-4587 | -1.060061171 | -1.410309454 | -1028.48729  |
| TCGA-56-A4BW | -0.346473056 | -0.430062228 | 765.3034133  |
| TCGA-21-1076 | 0.750871087  | 1.227073541  | 3676.349829  |
| TCGA-6A-AB49 | -2.048981267 | -1.464918508 | -2185.661321 |
| TCGA-63-A5M9 | -0.547210752 | -0.554031657 | 415.3740621  |
| TCGA-39-5022 | 0.59798522   | 1.254188986  | 3533.688484  |
| TCGA-43-6771 | -0.05715588  | -0.276588335 | 1243.965712  |
| TCGA-98-8020 | 0.086069597  | -0.062706645 | 1621.462017  |
| TCGA-77-7141 | -0.95797164  | -1.143952196 | -643.3340653 |
| TCGA-92-7340 | 0.844858624  | 0.134916627  | 2668.044114  |
| TCGA-56-8622 | -0.060328059 | -0.553515337 | 958.2216085  |
| TCGA-70-6722 | 0.355044922  | 0.104134397  | 2091.088439  |
| TCGA-43-A56U | 0.095712963  | 1.356456174  | 3078.443649  |

|              |              |              |              |
|--------------|--------------|--------------|--------------|
| TCGA-66-2770 | 0.091997607  | 0.047699752  | 1740.57795   |
| TCGA-85-7710 | -0.850051088 | -0.408637193 | 226.2195139  |
| TCGA-58-8387 | -0.674486809 | 0.538278411  | 1386.756951  |
| TCGA-85-8352 | -1.884326039 | -1.781035167 | -2324.405816 |
| TCGA-21-5786 | -0.436896551 | -0.794468062 | 293.2252445  |
| TCGA-33-AASI | -1.152409121 | -0.155938391 | 146.9538731  |
| TCGA-56-8625 | 0.874268388  | 1.349265386  | 3938.320956  |
| TCGA-34-2600 | -1.461514403 | -1.220972782 | -1282.702629 |
| TCGA-60-2726 | -0.958908155 | -0.189225381 | 328.5656404  |
| TCGA-77-8153 | -1.335829735 | -1.795557688 | -1728.254831 |
| TCGA-66-2791 | 0.280444326  | 0.728545159  | 2644.317905  |
| TCGA-68-7756 | -0.342205911 | -0.680198694 | 515.1474039  |
| TCGA-94-7557 | -0.446308058 | -0.59726559  | 483.7071664  |
| TCGA-56-A5DS | -0.609167233 | -0.011812958 | 898.9270843  |
| TCGA-22-4613 | -0.459989988 | 0.284405364  | 1366.960452  |
| TCGA-77-8130 | 0.094454728  | -0.959350204 | 717.0505348  |
| TCGA-21-1080 | -0.890470368 | -0.520366904 | 67.33641259  |
| TCGA-98-A53I | -0.354883206 | 0.361757119  | 1562.862786  |
| TCGA-34-5236 | 0.535618774  | -0.210101449 | 1971.991835  |
| TCGA-21-5782 | -0.16755779  | -0.458604792 | 935.5036354  |
| TCGA-60-2708 | 0.444166739  | -0.878562927 | 1188.911034  |
| TCGA-96-A4JK | -0.59144869  | -0.367834569 | 555.8486904  |
| TCGA-66-2788 | 0.556567708  | 0.378877677  | 2595.54287   |
| TCGA-56-8624 | -0.158541367 | -0.565226603 | 836.8905707  |
| TCGA-22-5473 | -0.524521857 | -0.734736401 | 256.4938548  |
| TCGA-21-A5DI | -0.952575038 | -1.20472115  | -699.2513986 |
| TCGA-85-8049 | 0.711913616  | 0.919527959  | 3319.542978  |
| TCGA-21-5783 | -0.353115913 | -1.360969952 | -190.7651316 |
| TCGA-46-3765 | -0.295376222 | -0.180927557 | 1076.10649   |
| TCGA-39-5021 | -0.223779956 | 0.035648358  | 1376.563182  |
| TCGA-90-6837 | 0.549140382  | 0.432135804  | 2641.544118  |
| TCGA-39-5011 | -0.226466693 | 1.091249317  | 2449.312186  |
| TCGA-39-5019 | -0.143053645 | -0.167336511 | 1259.62357   |
| TCGA-98-A539 | -0.504645455 | -0.537217503 | 479.9210024  |
| TCGA-66-2781 | -0.346751607 | -0.433604375 | 761.3834151  |
| TCGA-37-5819 | -0.664221371 | -0.638180927 | 199.2852556  |
| TCGA-56-8201 | 0.735357503  | 1.259351128  | 3691.963235  |
| TCGA-63-A5MB | -0.970366228 | -0.780165409 | -286.4121744 |
| TCGA-60-2722 | -1.067344925 | -1.296775304 | -920.9000416 |
| TCGA-85-8048 | 0.500910362  | 1.047549956  | 3214.978569  |
| TCGA-56-7223 | -1.431409623 | -2.418594296 | -2469.641933 |
| TCGA-43-8115 | 0.967909063  | 0.795600031  | 3478.394779  |
| TCGA-18-5592 | -0.877907725 | -0.973701125 | -380.6542734 |
| TCGA-77-7337 | 0.400101294  | -0.407404867 | 1619.975781  |
| TCGA-60-2719 | -0.894520498 | -0.560302422 | 22.12763501  |
| TCGA-22-5478 | -0.09160751  | -0.485053829 | 993.148279   |
| TCGA-66-2757 | -0.395520946 | -0.21103022  | 933.881812   |
| TCGA-18-3406 | 0.37104932   | 0.533500824  | 2546.473846  |
| TCGA-77-A5GB | 0.007621304  | 0.123355939  | 1723.693873  |
| TCGA-21-1070 | -0.178106506 | 0.791922883  | 2198.141347  |
| TCGA-43-A475 | -0.233990391 | 1.248261097  | 2600.939346  |
| TCGA-85-7698 | 0.162544696  | -0.099562644 | 1669.085712  |
| TCGA-85-7843 | -0.029724614 | -0.435637103 | 1112.437034  |
| TCGA-NC-A5HT | -1.307129411 | -2.099370059 | -2005.895623 |
| TCGA-58-8393 | -0.105833558 | 0.799548098  | 2286.414325  |
| TCGA-66-2737 | 0.810442651  | 0.082770956  | 2576.568778  |
| TCGA-LA-A7SW | -0.84434729  | -0.888495483 | -256.4411417 |
| TCGA-77-8007 | 0.432450577  | 0.780921015  | 2867.007459  |

|              |              |              |              |
|--------------|--------------|--------------|--------------|
| TCGA-85-8354 | -1.436824566 | -1.233222335 | -1267.684769 |
| TCGA-22-5474 | -0.14247723  | 0.752144531  | 2197.290218  |
| TCGA-77-7140 | -0.547643649 | -1.25428381  | -298.7209849 |
| TCGA-22-4601 | -0.899676746 | -0.964471102 | -395.4958837 |
| TCGA-66-2794 | -0.68263032  | 0.652852243  | 1494.446067  |
| TCGA-22-1017 | -0.723302679 | -0.031159973 | 752.0795019  |
| TCGA-77-A5GA | -1.027964478 | -0.884798586 | -457.1983864 |
| TCGA-56-7222 | -1.297761112 | -1.284463155 | -1165.005403 |
| TCGA-85-7699 | 0.286918249  | 0.718654618  | 2641.449728  |
| TCGA-66-2758 | -0.418199026 | 0.517585936  | 1651.139545  |
| TCGA-85-7950 | 0.25904642   | 0.287874883  | 2171.405339  |
| TCGA-39-5034 | 0.163117991  | -0.378025284 | 1385.94862   |
| TCGA-85-8052 | -0.730537637 | -0.760737291 | 0.523196319  |
| TCGA-43-3394 | -0.609123316 | -0.969954687 | -77.44692763 |
| TCGA-NK-A5CX | -0.178087783 | -0.037807729 | 1352.600456  |
| TCGA-39-5035 | -0.293094669 | 0.543751551  | 1817.153705  |
| TCGA-43-6647 | 0.953774135  | 0.435364938  | 3095.54206   |
| TCGA-18-4086 | -0.000870125 | -0.1140821   | 1472.267251  |
| TCGA-NC-A5HF | -1.556843529 | -1.749143096 | -1927.134088 |
| TCGA-39-5029 | -0.338858167 | 0.017000911  | 1229.378404  |
| TCGA-43-5668 | 0.034934413  | 0.892968587  | 2538.413716  |
| TCGA-22-1012 | -0.610828267 | -0.426367073 | 474.6131717  |
| TCGA-34-8454 | 0.186166713  | 0.720872876  | 2531.486745  |
| TCGA-60-2709 | 0.924807945  | 1.042163078  | 3681.653404  |
| TCGA-85-A512 | -0.704786112 | -0.98450126  | -198.8264443 |
| TCGA-NC-A5HI | -1.520259697 | -0.984846338 | -1107.50523  |
| TCGA-18-3409 | 1.022772841  | -0.021924487 | 2706.382835  |
| TCGA-56-8307 | -0.842067447 | 0.165571623  | 820.2768417  |
| TCGA-85-8288 | 0.177079882  | -0.289585106 | 1491.62788   |
| TCGA-18-3410 | -0.458029832 | 0.604510046  | 1695.356031  |
| TCGA-22-1000 | 1.12781969   | 1.025356885  | 3890.65414   |
| TCGA-66-2778 | -0.613888581 | 0.125814925  | 1033.921943  |
| TCGA-34-5239 | 0.72003301   | 0.593578981  | 2996.418848  |
| TCGA-34-8455 | -0.279039456 | -0.690539919 | 574.9677448  |
| TCGA-66-2765 | -0.137345702 | 0.269638069  | 1711.293433  |
| TCGA-85-8277 | -0.879359863 | -0.587116624 | 11.68871671  |
| TCGA-92-8065 | -0.290643286 | 0.292336328  | 1563.672028  |
| TCGA-46-3766 | 1.362669416  | 1.188862453  | 4318.870154  |
| TCGA-77-8131 | 0.570468128  | 1.375199186  | 3626.357227  |
| TCGA-94-A5I4 | -1.087248156 | -1.047640499 | -689.1812854 |
| TCGA-18-3407 | 0.044318423  | -0.426703783 | 1204.014715  |
| TCGA-77-8139 | -0.279462899 | -0.669031913 | 596.4144617  |
| TCGA-21-1078 | -1.713981941 | -1.540793979 | -1889.840609 |
| TCGA-18-3411 | -0.195189465 | -0.060683223 | 1310.239544  |
| TCGA-66-2742 | -0.293609479 | -0.210162276 | 1048.281888  |
| TCGA-56-1622 | -0.973575014 | -1.50670242  | -1030.385555 |
| TCGA-77-A5G3 | -0.847283807 | -0.939817834 | -312.0135973 |
| TCGA-22-5482 | -0.52859754  | -1.170124519 | -191.7411611 |
| TCGA-NK-A7XE | -1.548175091 | -0.889428095 | -1041.360389 |
| TCGA-22-5489 | 0.774256734  | 0.791581641  | 3258.597253  |
| TCGA-O2-A52W | -1.339418631 | -0.909326034 | -829.1115562 |
| TCGA-52-7812 | -0.567838359 | 0.409647616  | 1374.463829  |
| TCGA-46-6025 | -0.770390994 | -1.029286895 | -317.5415344 |
| TCGA-58-8391 | -1.202456474 | -1.24288108  | -1016.473489 |
| TCGA-85-A50M | -0.303810775 | -0.761354943 | 475.2096866  |
| TCGA-18-3417 | 0.528508619  | -0.309385127 | 1862.89409   |
| TCGA-60-2724 | 0.195653036  | -0.719036164 | 1074.670937  |
| TCGA-94-A5I6 | -0.714292417 | -1.135628816 | -363.4262269 |

|              |              |              |              |
|--------------|--------------|--------------|--------------|
| TCGA-43-8116 | -0.722492292 | -0.242004581 | 538.1146724  |
| TCGA-34-5241 | 0.521762584  | 0.565212339  | 2746.664575  |
| TCGA-77-7338 | 0.185654039  | -0.401234393 | 1387.39879   |
| TCGA-56-7822 | -0.63215466  | -0.661987541 | 210.7423875  |
| TCGA-85-A4JC | -0.058145288 | -0.060314698 | 1463.263752  |
| TCGA-66-2792 | -0.381951511 | -0.849172771 | 298.678112   |
| TCGA-98-A53A | -1.321486615 | -1.105670906 | -1009.228821 |
| TCGA-22-4594 | 0.253211861  | 0.584433791  | 2467.123638  |
| TCGA-58-8386 | 0.060511021  | 0.208444019  | 1869.317402  |
| TCGA-22-5481 | -0.817917378 | 0.005295832  | 683.8429197  |
| TCGA-66-2754 | -1.257420784 | -1.544179908 | -1384.743851 |
| TCGA-21-1082 | -0.169184746 | 0.044479902  | 1446.3749    |
| TCGA-58-8392 | -1.459491657 | -1.42529793  | -1488.673205 |
| TCGA-60-2713 | 0.642922066  | 0.553812392  | 2870.002372  |
| TCGA-22-5479 | -0.492718965 | -0.479193679 | 552.3364072  |
| TCGA-37-4133 | -0.471803672 | -0.08592387  | 976.4065488  |
| TCGA-63-A5MU | -1.613156853 | -1.572173571 | -1809.513428 |
| TCGA-66-2769 | 0.530188033  | 0.71096421   | 2904.582178  |
| TCGA-LA-A446 | -1.351920522 | -1.013842412 | -949.5475033 |
| TCGA-66-2759 | -0.217409374 | 0.077468864  | 1426.277582  |
| TCGA-22-4609 | 0.427248531  | 0.757017069  | 2836.853056  |
| TCGA-66-2773 | -0.249806185 | 0.292210254  | 1609.030545  |
| TCGA-66-2755 | 0.236081597  | 1.049058855  | 2921.532883  |
| TCGA-77-8150 | -0.635349478 | -0.155280217 | 723.5590159  |
| TCGA-37-A5EL | -1.722289315 | -1.304676956 | -1658.471798 |
| TCGA-77-8009 | -0.609876842 | -1.058286614 | -168.3035391 |
| TCGA-33-AAS8 | -1.750076503 | -1.319973291 | -1705.011149 |
| TCGA-58-A46N | -1.49263495  | -1.556757728 | -1659.558377 |
| TCGA-33-AASD | -0.983475829 | -1.310981758 | -841.958739  |
| TCGA-63-A5MS | 0.272861211  | 0.47019233   | 2372.58918   |
| TCGA-43-A474 | -0.776503153 | -1.925638605 | -1237.803618 |
| TCGA-43-6770 | -0.179774465 | -0.678121653 | 698.1907052  |
| TCGA-22-4607 | -0.115660115 | -0.274408955 | 1181.020882  |
| TCGA-58-A46K | -1.04259884  | -0.93466464  | -524.3165733 |
| TCGA-77-7465 | -0.287447474 | 0.572268939  | 1852.505411  |
| TCGA-18-4721 | 0.333071851  | 0.557928809  | 2529.066156  |
| TCGA-85-A4CL | -0.449301659 | 0.262003273  | 1356.036283  |
| TCGA-22-4604 | 0.672633412  | 0.461045952  | 2808.560377  |
| TCGA-56-7730 | -1.81482604  | -1.902211169 | -2370.480251 |
| TCGA-39-5039 | 0.293116303  | -0.226722404 | 1684.938849  |
| TCGA-J1-A4AH | -1.354981998 | -1.201593073 | -1144.290489 |
| TCGA-92-8063 | -0.344979948 | -0.65398471  | 538.771644   |
| TCGA-46-3769 | 0.080099549  | 0.396555399  | 2082.836885  |
| TCGA-43-8118 | -0.270388245 | -0.118521384 | 1167.536584  |
| TCGA-NC-A5HO | -1.127438841 | -0.669834549 | -348.9338357 |
| TCGA-22-4605 | 0.317007444  | 0.042416614  | 1985.824493  |
| TCGA-60-2714 | -0.321273022 | 0.172797633  | 1407.735174  |
| TCGA-33-6738 | -1.231833104 | -0.748213974 | -545.089797  |
| TCGA-63-A5MV | 0.063441802  | 0.144111316  | 1807.021733  |
| TCGA-85-A4CN | -0.022299168 | -0.645016847 | 907.3332975  |
| TCGA-NC-A5HK | -1.456708816 | -0.920225026 | -970.8638791 |
| TCGA-43-3920 | 0.40925344   | 0.084651563  | 2131.614824  |
| TCGA-21-1072 | -0.652784691 | -1.130733725 | -289.9264633 |
| TCGA-98-A53B | -0.602255855 | -0.266299572 | 647.2832426  |
| TCGA-85-8072 | -0.815309559 | -0.353721643 | 320.8802019  |
| TCGA-68-A59J | -0.555992509 | -0.009216724 | 960.8022924  |
| TCGA-66-2766 | -0.601195979 | -0.760675203 | 144.6555575  |
| TCGA-NC-A5HR | -1.446959325 | -1.147627343 | -1191.745385 |

|              |              |              |              |
|--------------|--------------|--------------|--------------|
| TCGA-NC-A5HE | 0.032863758  | 1.438265135  | 3091.808011  |
| TCGA-98-A53D | 0.952636923  | 0.937286161  | 3605.773164  |
| TCGA-66-2783 | -0.317045328 | -0.272811    | 958.3334738  |
| TCGA-77-7138 | -1.021233695 | -0.930925319 | -496.708029  |
| TCGA-56-8629 | -0.764008941 | -0.907752517 | -186.5795571 |
| TCGA-79-5596 | -1.129967349 | -1.423886058 | -1120.188948 |
| TCGA-63-A5MJ | 0.011287149  | -0.752403768 | 835.3080579  |
| TCGA-56-6546 | 0.047152891  | 0.715716423  | 2371.38934   |
| TCGA-51-4081 | -0.401094077 | -1.696680237 | -586.3218945 |
| TCGA-34-5927 | -1.011719183 | -1.454157815 | -1019.325844 |
| TCGA-85-8582 | 0.616655654  | -0.247105454 | 2024.545908  |
| TCGA-77-8154 | -1.087158282 | -1.705362221 | -1359.352131 |
| TCGA-77-6844 | -0.946326496 | -0.673060225 | -150.4864347 |
| TCGA-85-8580 | -1.297986173 | -0.642936497 | -511.4892015 |
| TCGA-56-A4ZJ | 0.736152164  | 0.51848883   | 2937.850543  |
| TCGA-21-1083 | -0.310036527 | -0.123423868 | 1118.377745  |
| TCGA-46-3767 | 1.160302847  | 0.721594391  | 3617.277739  |
| TCGA-56-5898 | -0.203583208 | -0.31809394  | 1038.567976  |
| TCGA-68-7757 | 0.124753777  | -0.387080174 | 1333.988426  |
| TCGA-56-A49D | -0.515793898 | 0.381656528  | 1403.909155  |
| TCGA-18-3412 | -0.627526255 | -0.557116129 | 322.770147   |
| TCGA-37-4132 | -0.351186715 | 0.229154767  | 1431.847791  |
| TCGA-22-5483 | 0.069624243  | -0.431017688 | 1227.805757  |
| TCGA-85-A4JB | -0.600699134 | -0.978431616 | -76.70219773 |
| TCGA-60-2725 | 0.454113112  | 0.943070421  | 3056.379782  |
| TCGA-77-7463 | -1.050554803 | -0.725744451 | -320.2720846 |
| TCGA-33-AASJ | -1.758934854 | -1.36138548  | -1757.080479 |
| TCGA-43-7657 | -0.388129964 | -1.402233757 | -271.8171543 |
| TCGA-22-A5C4 | -1.080066514 | -0.961714049 | -593.6159953 |
| TCGA-90-7769 | -1.233006016 | -1.537592138 | -1350.835641 |
| TCGA-21-1077 | -0.297388818 | -0.343285109 | 908.4094192  |
| TCGA-NC-A5HQ | -1.116877175 | -0.094776588 | 248.8604099  |
| TCGA-60-2696 | -0.242803192 | 0.164990747  | 1487.184096  |
| TCGA-22-4591 | -1.146020082 | -1.012053724 | -718.3794855 |
| TCGA-77-8143 | -1.378625915 | -0.973879931 | -938.5687352 |
| TCGA-NK-A5CR | -1.425994048 | -1.590847477 | -1620.069614 |
| TCGA-56-7823 | -1.260794526 | -1.227677378 | -1065.960391 |
| TCGA-63-A5MN | 0.70102641   | 1.384218798  | 3780.973175  |
| TCGA-52-7622 | -0.011660087 | 0.560756603  | 2147.963216  |
| GSM442070    | 2.697738748  | 2.371455702  | 7011.113512  |
| GSM442071    | 2.772890515  | 2.05678316   | 6774.145956  |
| GSM442072    | 2.941422207  | 2.988864666  | 7911.732913  |
| GSM442073    | 2.9397058    | 2.001323702  | 6903.437974  |
| GSM442074    | 2.837232427  | 2.257069868  | 7049.922279  |
| GSM442075    | 1.98441281   | 1.581888308  | 5411.932814  |
| GSM442076    | 2.687737564  | 1.534477871  | 6147.026306  |
| GSM442077    | 2.018620732  | 1.320083694  | 5183.235999  |
| GSM442078    | 1.356742853  | 0.82170737   | 3938.108419  |
| GSM442079    | 2.281471036  | 2.029122586  | 6198.582882  |
| GSM442080    | 1.810517517  | 2.036788135  | 5681.816255  |
| GSM442081    | 1.705631912  | 0.774590137  | 4278.707353  |
| GSM442082    | 2.929478689  | 2.484583065  | 7384.526235  |
| GSM442083    | 2.399748643  | 2.28623977   | 6592.351057  |
| GSM442084    | 3.351391216  | 2.646245806  | 8019.226886  |
| GSM442085    | 2.72195235   | 1.446150386  | 6095.124184  |
| GSM442086    | 3.129381995  | 2.936697632  | 8067.932286  |
| GSM442087    | 2.750087082  | 1.725862087  | 6411.511023  |
| GSM442088    | 1.219063373  | 0.726215189  | 3687.437969  |



|            |              |              |              |
|------------|--------------|--------------|--------------|
| GSM442089  | 1.597461131  | 1.6156016    | 5015.277588  |
| GSM442090  | 2.891759378  | 1.360508033  | 6196.98982   |
| GSM442091  | 2.197847873  | 2.23601327   | 6316.276131  |
| GSM442092  | 2.259137777  | 1.420436974  | 5553.407415  |
| GSM442093  | 2.370331124  | 0.835543945  | 5081.209045  |
| GSM442094  | 2.475479546  | 1.146757619  | 5515.481729  |
| GSM442095  | 2.182327377  | 2.233268524  | 6296.191286  |
| GSM442096  | 3.117629813  | 3.068250606  | 8188.904931  |
| GSM442097  | 1.444176352  | 1.901447425  | 5135.838825  |
| GSM442098  | 0.447125659  | -0.981458832 | 1087.347727  |
| GSM442099  | 2.434642981  | 1.819695544  | 6155.772805  |
| GSM442100  | 2.730365022  | 2.853036507  | 7538.224057  |
| GSM442101  | 3.017478354  | 2.048162707  | 7037.798751  |
| GSM442102  | 2.667876374  | 2.011835005  | 6611.368668  |
| GSM442103  | 1.490229907  | 0.830261119  | 4095.511871  |
| GSM442104  | 3.138556496  | 2.029518841  | 7153.663814  |
| GSM442105  | 2.171029725  | 1.910094437  | 5954.267032  |
| GSM442106  | 2.725305133  | 2.882274263  | 7562.383633  |
| GSM442107  | 2.169842164  | 1.621972883  | 5659.32538   |
| GSM442108  | 2.12294333   | 1.434980021  | 5416.525774  |
| GSM442109  | 1.83650668   | 0.767596257  | 4417.356796  |
| GSM442110  | 2.266863597  | 1.373133609  | 5513.807026  |
| GSM442111  | 2.482409163  | 1.760883642  | 6149.043837  |
| GSM442112  | 2.978553452  | 2.105678609  | 7053.054979  |
| GSM442113  | 2.947800297  | 2.297346586  | 7214.125102  |
| GSM442114  | 1.818787816  | 0.990734136  | 4625.015698  |
| GSM442115  | 3.081451171  | 2.422407859  | 7490.441498  |
| GSM442116  | 3.101002552  | 3.028544866  | 8129.921096  |
| GSM442117  | 2.421400239  | 2.239411275  | 6568.746027  |
| GSM442118  | 2.509039217  | 0.663722304  | 5060.6111    |
| GSM442119  | 2.884533334  | 2.012739002  | 6853.616428  |
| GSM442120  | 2.755171065  | 1.96915701   | 6665.110846  |
| GSM442121  | 2.779030932  | 2.28600139   | 7014.577228  |
| GSM442122  | 2.053854189  | 2.377662573  | 6300.23862   |
| GSM442123  | 2.133495395  | 1.047158158  | 5033.0579    |
| GSM442124  | 0.871402206  | -0.616180591 | 1932.182028  |
| GSM442125  | 1.802260307  | 0.694847549  | 4305.074234  |
| GSM4750621 | 0.041022961  | 0.253772785  | 1893.803974  |
| GSM4750622 | 0.334130171  | 0.594278526  | 2567.288245  |
| GSM4750623 | -0.152747057 | -0.943573256 | 457.7791963  |
| GSM4750624 | 0.025077654  | -0.296217167 | 1315.559385  |
| GSM4750625 | 0.388209126  | -0.133379941 | 1885.982796  |
| GSM4750626 | -0.226927792 | 0.377723775  | 1721.659083  |
| GSM4750627 | -0.026344383 | -0.070026254 | 1488.788803  |
| GSM4750628 | -0.268265613 | -0.170348452 | 1117.084988  |
| GSM4750629 | 0.359421742  | -1.343777685 | 620.4256001  |
| GSM4750630 | 0.269695678  | -0.158852488 | 1728.016308  |
| GSM4750631 | -0.282877385 | -0.692600727 | 568.592683   |
| GSM4750632 | 1.355308796  | 1.222960033  | 4345.419577  |
| GSM4750633 | -0.714930036 | -1.150553882 | -379.3462828 |
| GSM4750634 | 0.835987339  | 0.87402773   | 3411.375934  |
| GSM4750635 | 0.214645716  | -0.498824414 | 1320.239568  |
| GSM4750636 | -0.411849616 | -0.064630993 | 1064.886388  |
| GSM4750637 | -0.25408038  | -0.516162555 | 780.4732322  |
| GSM4750638 | 0.460089734  | 1.149248397  | 3273.14875   |
| GSM4750639 | -0.077566779 | 0.298320784  | 1807.109033  |
| GSM4750640 | 0.641628239  | 0.736354226  | 3054.585928  |
| GSM4750641 | -0.433705195 | -0.476312948 | 621.0054491  |

|            |              |              |              |
|------------|--------------|--------------|--------------|
| GSM4750642 | 0.750537733  | 0.980603642  | 3424.806011  |
| GSM4750643 | 0.406895201  | 0.549862648  | 2603.075308  |
| GSM4750644 | -0.962137284 | -0.350487895 | 160.6294506  |
| GSM4750645 | 0.177041145  | -0.532796523 | 1243.732878  |
| GSM4750646 | 0.820204286  | 0.381038028  | 2891.399881  |
| GSM4750647 | -1.218054847 | -0.642720121 | -422.2360252 |
| GSM4750648 | -0.563571734 | -1.412323509 | -477.5177854 |
| GSM4750649 | 1.379600156  | 1.54198632   | 4697.590121  |
| GSM4750650 | 0.774903699  | 1.337743146  | 3815.900068  |
| GSM4750651 | 0.249407826  | -0.926871552 | 922.7456385  |
| GSM4750652 | 0.18230298   | -1.337900185 | 429.1289308  |
| GSM4750653 | -0.525163686 | -1.067756128 | -83.5947486  |
| GSM4750654 | 0.518275543  | 1.301387722  | 3493.00198   |
| GSM4750655 | -0.255734749 | -0.862255752 | 425.9338871  |
| GSM4750656 | 0.766209417  | 0.590424128  | 3044.638064  |
| GSM4750657 | 1.144106496  | 0.494871335  | 3368.188301  |
| GSM4750658 | 0.663304488  | -0.621992212 | 1694.466852  |
| GSM4750659 | -0.207522292 | 0.200991977  | 1563.170369  |
| GSM4750660 | 0.007618057  | 0.581611125  | 2190.688882  |
| GSM4750661 | -1.139424998 | -1.148992962 | -850.5854734 |
| GSM4750662 | 0.531002803  | 0.211077097  | 2396.064838  |
| GSM4750663 | 0.162302543  | 0.011524399  | 1782.022553  |
| GSM4750664 | 1.492859245  | 1.090121141  | 4363.25871   |
| GSM4750665 | 0.595703246  | 0.310255517  | 2569.203098  |
| GSM4750666 | 1.744369238  | 1.30627834   | 4863.688221  |
| GSM4750667 | 1.271956673  | 0.800993773  | 3822.559289  |
| GSM4750668 | 0.709391577  | 0.688025453  | 3080.814229  |
| GSM4750669 | -0.460676614 | -0.488111189 | 578.9395911  |
| GSM4750670 | -0.223220507 | -0.901219989 | 422.4426805  |
| GSM4750671 | 0.715041191  | 0.529767377  | 2925.829518  |
| GSM4750672 | -1.119967153 | -0.891314654 | -566.3172985 |
| GSM4750673 | 0.274194476  | 0.358271165  | 2260.017653  |
| GSM4750674 | 0.356053335  | 0.821404352  | 2823.167032  |
| GSM4750675 | 0.301090547  | 0.421866157  | 2354.784608  |
| GSM4750676 | 1.174807505  | 1.230692942  | 4152.246038  |
| GSM4750677 | 1.13749346   | 0.735401833  | 3605.942057  |
| GSM4750678 | -0.281430056 | -0.325387259 | 944.4246574  |
| GSM4750679 | -0.212799286 | -0.989727923 | 343.8538564  |
| GSM4750680 | -0.166011235 | 0.150240776  | 1557.688537  |
| GSM4750681 | -0.543364562 | -0.146681711 | 834.7803172  |
| GSM4750682 | 0.515444946  | 1.085689795  | 3270.035669  |
| GSM4750683 | -0.881213563 | -0.679031974 | -84.045135   |
| GSM4750684 | 1.044560444  | 1.717928354  | 4503.700243  |
| GSM4750685 | 0.286058868  | -0.524445569 | 1373.674144  |
| GSM4750686 | -0.367988873 | 0.017581534  | 1197.522444  |
| GSM4750687 | -1.291109861 | -0.741384792 | -604.1565946 |
| GSM4750688 | 0.770648717  | 0.416930918  | 2872.77941   |
| GSM4750689 | -0.287729863 | -0.488058022 | 771.6330298  |
| GSM4750690 | -0.773362565 | -1.316619847 | -613.6666843 |
| GSM4750691 | -0.494598423 | 0.045866396  | 1085.321087  |
| GSM4750692 | 0.664722958  | 0.950268951  | 3298.306502  |
| GSM4750693 | -0.071379325 | -0.342685006 | 1160.764936  |
| GSM4750694 | -0.804034798 | -0.876649598 | -199.4665832 |
| GSM4750695 | 0.72560859   | 1.304800591  | 3727.420899  |
| GSM4750696 | -0.451746345 | -0.435014397 | 642.9965723  |
| GSM4750697 | 1.556588761  | 0.422742384  | 3754.132516  |
| GSM4750698 | 0.701831069  | 0.212199925  | 2587.48864   |
| GSM4750699 | 0.837363967  | 0.978805925  | 3519.686659  |

|            |              |              |              |
|------------|--------------|--------------|--------------|
| GSM4750700 | 0.254039885  | 0.062290557  | 1935.940296  |
| GSM4750701 | 0.56490966   | 1.084478226  | 3323.897974  |
| GSM4750702 | -0.554689575 | -0.394244557 | 569.8794799  |
| GSM4750703 | 0.191878734  | 1.142323613  | 2967.341115  |
| GSM4750704 | -0.774960327 | -0.647323641 | 66.61990098  |
| GSM4750705 | 0.239408255  | 0.579952759  | 2447.181761  |
| GSM4750706 | -0.155591105 | -0.597400718 | 807.3887703  |
| GSM4750707 | -0.348863147 | -0.611143607 | 578.1047911  |
| GSM4750708 | -0.041352719 | 0.061535969  | 1606.143958  |
| GSM4750709 | 0.496556478  | 1.155848936  | 3320.49424   |
| GSM4750710 | 0.090534814  | -0.466428473 | 1215.010883  |
| GSM4750711 | 0.547621039  | 0.778382575  | 2992.704882  |
| GSM4750712 | 0.649985304  | 0.805242499  | 3134.097217  |
| GSM4750713 | 1.381852756  | 0.750954904  | 3893.975038  |
| GSM4750714 | 0.201267243  | -0.474514695 | 1330.111306  |
| GSM4750715 | 0.881769321  | 1.129130902  | 3722.341362  |
| GSM4750716 | -1.428868046 | -1.518094374 | -1549.129636 |
| GSM4750717 | 0.947812393  | 1.349585893  | 4020.56564   |
| GSM4750718 | -1.102398338 | -0.715730428 | -367.8136718 |
| GSM4750719 | 1.144222472  | 1.646418842  | 4541.836341  |
| GSM4750720 | -0.408143215 | 0.373002615  | 1514.998406  |
| GSM4750721 | 0.908200738  | 0.461129095  | 3071.0352    |
| GSM4750722 | 0.21790271   | 0.958429433  | 2808.925447  |
| GSM4750723 | 0.159767769  | 0.197054042  | 1968.268679  |
| GSM4750724 | 0.667959903  | 1.09882248   | 3453.299928  |
| GSM4750725 | 0.215685264  | 0.587061885  | 2428.002329  |
| GSM4750726 | 0.20282005   | -0.059714166 | 1754.555783  |
| GSM4750727 | 1.240556604  | 1.929487033  | 4937.608606  |
| GSM4750728 | 0.646789807  | 0.419978545  | 2737.923135  |
| GSM4750729 | -0.61249995  | -0.038840944 | 867.671213   |
| GSM4750730 | 0.340957815  | 0.197176021  | 2170.214156  |
| GSM4750731 | 0.401316931  | -0.615884204 | 1408.872745  |
| GSM4750732 | -1.183736299 | -0.772648072 | -516.4167683 |
| GSM4750733 | 0.932092025  | 0.637888213  | 3277.778514  |
| GSM4750734 | -0.546030816 | -0.373352279 | 600.815064   |
| GSM4750735 | 0.662464195  | 0.408351416  | 2743.533306  |
| GSM4750736 | 0.766843559  | -0.035431631 | 2407.547421  |
| GSM4750737 | 0.582009003  | 0.336329709  | 2580.52125   |
| GSM4750738 | 0.751158441  | 0.725159567  | 3165.179485  |
| GSM4750739 | -0.310252317 | -0.069887588 | 1172.695128  |
| GSM4750740 | 0.728886297  | 0.374767632  | 2783.293975  |
| GSM4750741 | 0.128406646  | 0.376152326  | 2115.852087  |
| GSM4750742 | 0.736579198  | 1.160176788  | 3592.257468  |
| GSM4750743 | 1.359711789  | 1.740107613  | 4877.338592  |
| GSM4750744 | 1.081809799  | 1.259200896  | 4077.711071  |
| GSM4750745 | -0.613430535 | -1.155160017 | -270.9836053 |
| GSM4750746 | 0.77070045   | 0.876045636  | 3340.71159   |
| GSM4750747 | 0.233199625  | -0.313177478 | 1530.095161  |
| GSM4750748 | 1.253142332  | 1.16792179   | 4175.53161   |
| GSM4750749 | -0.54135378  | 0.460678607  | 1455.968717  |
| GSM4750750 | 0.333657358  | 0.232001837  | 2197.572723  |
| GSM4750751 | 0.655972206  | 0.531868529  | 2862.175911  |
| GSM4750752 | -0.793745184 | -1.166630685 | -483.5192288 |
| GSM4750753 | 1.26232953   | 1.506485684  | 4530.788545  |
| GSM4750754 | 1.125342503  | 0.229140836  | 3076.487157  |
| GSM4750755 | -1.515606808 | -1.551968445 | -1680.265252 |
| GSM4750756 | 0.903049162  | 1.489415605  | 4113.203104  |
| GSM4750757 | 1.444079044  | 1.073619792  | 4292.10798   |

|            |              |              |              |
|------------|--------------|--------------|--------------|
| GSM4750758 | 0.660582237  | 0.6281501    | 2965.42947   |
| GSM4750759 | 0.119337564  | 0.861470977  | 2600.328816  |
| GSM4750760 | 0.31957302   | 1.177176039  | 3145.092659  |
| GSM4750761 | 0.842704539  | -0.383457901 | 2137.379718  |
| GSM4750762 | -1.066003092 | -1.702353333 | -1332.721818 |
| GSM4750763 | 0.687910046  | 1.337521245  | 3718.774786  |
| GSM4750764 | -0.115123031 | -0.131372146 | 1327.38505   |
| GSM4750765 | 0.018327715  | 0.168147562  | 1781.265605  |
| GSM4750766 | -0.007738996 | 0.897014876  | 2495.004811  |
| GSM4750767 | -0.416627741 | -1.225521417 | -123.4758342 |
| GSM4750768 | 0.697689212  | 0.86010796   | 3243.145195  |
| GSM4750769 | 0.090781288  | -0.254630747 | 1431.124216  |
| GSM4750770 | -0.851483668 | -1.457060585 | -843.8033384 |
| GSM4750771 | -0.322897066 | 0.821646623  | 2067.155139  |
| GSM4750772 | 0.787963314  | 0.741922392  | 3223.257787  |
| GSM4750773 | -0.233973199 | -0.118321195 | 1208.302021  |
| GSM4750774 | 0.207015742  | -0.042386813 | 1776.887172  |
| GSM4750775 | 0.006475376  | -1.197482074 | 376.3780621  |
| GSM4750776 | -0.123960688 | 0.059680374  | 1512.23887   |
| GSM4750777 | 0.319104499  | 0.315824708  | 2266.785007  |
| GSM4750778 | 0.444377852  | -0.603138265 | 1469.825908  |
| GSM4750779 | -0.682425837 | -1.226063793 | -420.0916356 |
| GSM4750780 | 0.329097087  | 0.484093403  | 2449.394634  |
| GSM4750781 | 0.470945219  | 0.552720135  | 2677.330359  |
| GSM4750782 | -0.621907872 | -0.479522287 | 408.1025854  |
| GSM4750783 | 0.811157612  | 0.300076081  | 2798.816422  |
| GSM4750784 | 0.850173019  | -0.084684463 | 2450.172584  |
| GSM4750785 | 0.845209069  | 0.05786708   | 2589.914821  |
| GSM4750786 | 0.237006012  | -1.050040851 | 783.4123456  |
| GSM4750787 | 0.676956316  | 0.225450612  | 2573.285044  |
| GSM4750788 | 0.500164529  | 1.19483513   | 3364.243165  |
| GSM4750789 | 0.023341012  | -0.626948093 | 976.5837783  |
| GSM4750790 | 0.97007695   | 0.82599372   | 3511.783107  |
| GSM4750791 | 0.708082669  | 0.443477447  | 2830.142338  |
| GSM4750792 | 0.438070902  | 1.207263246  | 3307.744517  |
| GSM4750793 | 1.410953298  | 0.23620484   | 3401.817681  |
| GSM4750794 | 0.370029183  | -1.155431368 | 824.1807898  |
| GSM4750795 | 0.065576452  | 0.767514196  | 2444.696756  |
| GSM4750796 | 0.813421389  | 0.853104106  | 3364.917678  |
| GSM4750797 | -0.392844658 | -0.154199798 | 994.7775719  |
| GSM4750798 | 0.91612023   | 0.444324294  | 3062.731008  |
| GSM4750799 | -0.14864335  | -0.257809499 | 1161.198195  |
| GSM4750800 | 1.059260945  | 1.621054085  | 4421.351995  |
| GSM4750801 | 0.823422588  | 0.564322458  | 3081.766102  |
| GSM4750802 | 0.141544804  | -0.764806898 | 967.7576627  |
| GSM4750803 | -0.669260227 | -0.261865813 | 577.1678017  |
| GSM4750804 | 0.267295316  | 0.193350357  | 2084.265452  |
| GSM4750805 | 0.462029383  | 0.552183843  | 2666.852801  |
| GSM4750806 | 0.28281251   | -0.045114589 | 1858.534683  |
| GSM4750807 | -0.391817263 | -1.47988438  | -355.056491  |
| GSM4750808 | -0.49165203  | -0.585748656 | 444.9367991  |
| GSM4750809 | 0.135645924  | 0.327674908  | 2074.513302  |
| GSM4750810 | 0.858170964  | 0.803529329  | 3364.241988  |
| GSM4750811 | -0.152249431 | 0.177467155  | 1600.763177  |
| GSM4750812 | 0.822205746  | 1.44898623   | 3981.953726  |
| GSM4750813 | 0.147848913  | 0.260269569  | 2019.414357  |
| GSM4750814 | 0.219797996  | 1.294185608  | 3153.198891  |
| GSM4750815 | 0.631917797  | 0.263538335  | 2561.932663  |

|            |              |              |              |
|------------|--------------|--------------|--------------|
| GSM4750816 | -1.279279802 | -1.413570042 | -1275.989952 |
| GSM4750817 | -1.296266049 | -0.488311833 | -351.9983358 |
| GSM4750818 | 0.269805159  | 0.31453641   | 2210.559341  |
| GSM4750819 | -0.34711109  | -0.201380421 | 997.6379633  |
| GSM4750820 | 0.608163164  | 0.272272406  | 2544.373935  |
| GSM4750821 | -0.481741878 | -0.612476381 | 428.737679   |
| GSM4750822 | 0.699627937  | 0.949558579  | 3336.461995  |
| GSM4750823 | 0.421080992  | 0.341842502  | 2406.887218  |
| GSM4750824 | 0.527885506  | -0.386372558 | 1783.743689  |
| GSM4750825 | -0.062030986 | -0.291620713 | 1223.216312  |
| GSM4750826 | 0.517696276  | -0.655664398 | 1497.964379  |
| GSM4750827 | -0.575598787 | -0.787991435 | 145.32994    |
| GSM4750828 | 0.840258803  | 1.197407346  | 3745.683416  |
| GSM4750829 | 0.507492374  | 1.093340051  | 3268.973802  |
| GSM4750830 | -0.789041332 | -0.968578178 | -276.4484554 |
| GSM4750831 | 0.826735184  | 0.763134984  | 3288.061724  |
| GSM4750832 | 0.890233368  | 0.991170338  | 3591.176334  |
| GSM4750833 | -0.264343963 | -0.863289784 | 415.290628   |
| GSM4750834 | 0.281733495  | 0.667304094  | 2583.344331  |
| GSM4750835 | 1.057638402  | 0.702476755  | 3483.441056  |
| GSM4750836 | 1.141084475  | 1.090077825  | 3971.385118  |
| GSM4750837 | 0.261982581  | -0.017197456 | 1863.782751  |
| GSM4750838 | 0.126866562  | 0.484849731  | 2224.907978  |
| GSM4750839 | 0.656230749  | 0.647089339  | 2979.883098  |
| GSM4750840 | 0.702059034  | 0.524350878  | 2905.849308  |
| GSM4750841 | 0.485517389  | 0.941258106  | 3089.512999  |
| GSM4750842 | 1.166975531  | 1.09653143   | 4006.800987  |
| GSM4750843 | 0.784056256  | 0.89334444   | 3373.217012  |
| GSM4750844 | 0.458488861  | -0.047369539 | 2051.91637   |
| GSM4750845 | 0.621153774  | 1.007216972  | 3307.810913  |
| GSM4750846 | 0.332766672  | 1.024965652  | 3004.674064  |
| GSM4750847 | -0.532478612 | -0.610713815 | 374.0200255  |
| GSM4750848 | -0.017337519 | 0.318431023  | 1894.690211  |
| GSM4750849 | 0.81255074   | 0.181477682  | 2679.506939  |
| GSM4750850 | 1.895052121  | 1.714392665  | 5447.42963   |
| GSM4750851 | 0.448695099  | 0.954305752  | 3061.79455   |
| GSM4750852 | 0.457725952  | -1.322346884 | 751.7628729  |
| GSM4750853 | 1.389435957  | 1.209126043  | 4369.334671  |
| GSM4750854 | 0.881708805  | 1.084386238  | 3676.675571  |
| GSM4750855 | 0.226586695  | 0.357412563  | 2206.114049  |



FR007 17854 -0180 18421 3296 6164 64 96398  
FR008 17855 -0180 18422 3297 6165 65 96399  
FR009 17856 -0180 18423 3298 6166 66 96400  
FR010 17857 -0180 18424 3299 6167 67 96401  
FR011 17858 -0180 18425 3300 6168 68 96402  
FR012 17859 -0180 18426 3301 6169 69 96403  
FR013 17860 -0180 18427 3302 6170 70 96404  
FR014 17861 -0180 18428 3303 6171 71 96405  
FR015 17862 -0180 18429 3304 6172 72 96406  
FR016 17863 -0180 18430 3305 6173 73 96407  
FR017 17864 -0180 18431 3306 6174 74 96408  
FR018 17865 -0180 18432 3307 6175 75 96409  
FR019 17866 -0180 18433 3308 6176 76 96410  
FR020 17867 -0180 18434 3309 6177 77 96411  
FR021 17868 -0180 18435 3310 6178 78 96412  
FR022 17869 -0180 18436 3311 6179 79 96413  
FR023 17870 -0180 18437 3312 6180 80 96414  
FR024 17871 -0180 18438 3313 6181 81 96415  
FR025 17872 -0180 18439 3314 6182 82 96416  
FR026 17873 -0180 18440 3315 6183 83 96417  
FR027 17874 -0180 18441 3316 6184 84 96418  
FR028 17875 -0180 18442 3317 6185 85 96419  
FR029 17876 -0180 18443 3318 6186 86 96420  
FR030 17877 -0180 18444 3319 6187 87 96421  
FR031 17878 -0180 18445 3320 6188 88 96422  
FR032 17879 -0180 18446 3321 6189 89 96423  
FR033 17880 -0180 18447 3322 6190 90 96424  
FR034 17881 -0180 18448 3323 6191 91 96425  
FR035 17882 -0180 18449 3324 6192 92 96426  
FR036 17883 -0180 18450 3325 6193 93 96427  
FR037 17884 -0180 18451 3326 6194 94 96428  
FR038 17885 -0180 18452 3327 6195 95 96429  
FR039 17886 -0180 18453 3328 6196 96 96430  
FR040 17887 -0180 18454 3329 6197 97 96431  
FR041 17888 -0180 18455 3330 6198 98 96432  
FR042 17889 -0180 18456 3331 6199 99 96433  
FR043 17890 -0180 18457 3332 6200 100 96434  
FR044 17891 -0180 18458 3333 6201 101 96435  
FR045 17892 -0180 18459 3334 6202 102 96436  
FR046 17893 -0180 18460 3335 6203 103 96437  
FR047 17894 -0180 18461 3336 6204 104 96438  
FR048 17895 -0180 18462 3337 6205 105 96439  
FR049 17896 -0180 18463 3338 6206 106 96440  
FR050 17897 -0180 18464 3339 6207 107 96441  
FR051 17898 -0180 18465 3340 6208 108 96442  
FR052 17899 -0180 18466 3341 6209 109 96443  
FR053 17900 -0180 18467 3342 6210 110 96444  
FR054 17901 -0180 18468 3343 6211 111 96445  
FR055 17902 -0180 18469 3344 6212 112 96446  
FR056 17903 -0180 18470 3345 6213 113 96447  
FR057 17904 -0180 18471 3346 6214 114 96448  
FR058 17905 -0180 18472 3347 6215 115 96449  
FR059 17906 -0180 18473 3348 6216 116 96450  
FR060 17907 -0180 18474 3349 6217 117 96451  
FR061 17908 -0180 18475 3350 6218 118 96452  
FR062 17909 -0180 18476 3351 6219 119 96453  
FR063 17910 -0180 18477 3352 6220 120 96454  
FR064 17911 -0180 18478 3353 6221 121 96455  
FR065 17912 -0180 18479 3354 6222 122 96456  
FR066 17913 -0180 18480 3355 6223 123 96457  
FR067 17914 -0180 18481 3356 6224 124 96458  
FR068 17915 -0180 18482 3357 6225 125 96459  
FR069 17916 -0180 18483 3358 6226 126 96460  
FR070 17917 -0180 18484 3359 6227 127 96461  
FR071 17918 -0180 18485 3360 6228 128 96462  
FR072 17919 -0180 18486 3361 6229 129 96463  
FR073 17920 -0180 18487 3362 6230 130 96464  
FR074 17921 -0180 18488 3363 6231 131 96465  
FR075 17922 -0180 18489 3364 6232 132 96466  
FR076 17923 -0180 18490 3365 6233 133 96467  
FR077 17924 -0180 18491 3366 6234 134 96468  
FR078 17925 -0180 18492 3367 6235 135 96469  
FR079 17926 -0180 18493 3368 6236 136 96470  
FR080 17927 -0180 18494 3369 6237 137 96471  
FR081 17928 -0180 18495 3370 6238 138 96472  
FR082 17929 -0180 18496 3371 6239 139 96473  
FR083 17930 -0180 18497 3372 6240 140 96474  
FR084 17931 -0180 18498 3373 6241 141 96475  
FR085 17932 -0180 18499 3374 6242 142 96476  
FR086 17933 -0180 18500 3375 6243 143 96477  
FR087 17934 -0180 18501 3376 6244 144 96478  
FR088 17935 -0180 18502 3377 6245 145 96479  
FR089 17936 -0180 18503 3378 6246 146 96480  
FR090 17937 -0180 18504 3379 6247 147 96481  
FR091 17938 -0180 18505 3380 6248 148 96482  
FR092 17939 -0180 18506 3381 6249 149 96483  
FR093 17940 -0180 18507 3382 6250 150 96484  
FR094 17941 -0180 18508 3383 6251 151 96485  
FR095 17942 -0180 18509 3384 6252 152 96486  
FR096 17943 -0180 18510 3385 6253 153 96487  
FR097 17944 -0180 18511 3386 6254 154 96488  
FR098 17945 -0180 18512 3387 6255 155 96489  
FR099 17946 -0180 18513 3388 6256 156 96490  
FR100 17947 -0180 18514 3389 6257 157 96491  
FR101 17948 -0180 18515 3390 6258 158 96492  
FR102 17949 -0180 18516 3391 6259 159 96493  
FR103 17950 -0180 18517 3392 6260 160 96494  
FR104 17951 -0180 18518 3393 6261 161 96495  
FR105 17952 -0180 18519 3394 6262 162 96496  
FR106 17953 -0180 18520 3395 6263 163 96497  
FR107 17954 -0180 18521 3396 6264 164 96498  
FR108 17955 -0180 18522 3397 6265 165 96499  
FR109 17956 -0180 18523 3398 6266 166 96500  
FR110 17957 -0180 18524 3399 6267 167 96501  
FR111 17958 -0180 18525 3400 6268 168 96502  
FR112 17959 -0180 18526 3401 6269 169 96503  
FR113 17960 -0180 18527 3402 6270 170 96504  
FR114 17961 -0180 18528 3403 6271 171 96505  
FR115 17962 -0180 18529 3404 6272 172 96506  
FR116 17963 -0180 18530 3405 6273 173 96507  
FR117 17964 -0180 18531 3406 6274 174 96508  
FR118 17965 -0180 18532 3407 6275 175 96509  
FR119 17966 -0180 18533 3408 6276 176 96510  
FR120 17967 -0180 18534 3409 6277 177 96511  
FR121 17968 -0180 18535 3410 6278 178 96512  
FR122 17969 -0180 18536 3411 6279 179 96513  
FR123 17970 -0180 18537 3412 6280 180 96514  
FR124 17971 -0180 18538 3413 6281 181 96515  
FR125 17972 -0180 18539 3414 6282 182 96516  
FR126 17973 -0180 18540 3415 6283 183 96517  
FR127 17974 -0180 18541 3416 6284 184 96518  
FR128 17975 -0180 18542 3417 6285 185 96519  
FR129 17976 -0180 18543 3418 6286 186 96520  
FR130 17977 -0180 18544 3419 6287 187 96521  
FR131 17978 -0180 18545 3420 6288 188 96522  
FR132 17979 -0180 18546 3421 6289 189 96523  
FR133 17980 -0180 18547 3422 6290 190 96524  
FR134 17981 -0180 18548 3423 6291 191 96525  
FR135 17982 -0180 18549 3424 6292 192 96526  
FR136 17983 -0180 18550 3425 6293 193 96527  
FR137 17984 -0180 18551 3426 6294 194 96528  
FR138 17985 -0180 18552 3427 6295 195 96529  
FR139 17986 -0180 18553 3428 6296 196 96530  
FR140 17987 -0180 18554 3429 6297 197 96531  
FR141 17988 -0180 18555 3430 6298 198 96532  
FR142 17989 -0180 18556 3431 6299 199 96533  
FR143 17990 -0180 18557 3432 6300 200 96534  
FR144 17991 -0180 18558 3433 6301 201 96535  
FR145 17992 -0180 18559 3434 6302 202 96536  
FR146 17993 -0180 18560 3435 6303 203 96537  
FR147 17994 -0180 18561 3436 6304 204 96538  
FR148 17995 -0180 18562 3437 6305 205 96539  
FR149 17996 -0180 18563 3438 6306 206 96540  
FR150 17997 -0180 18564 3439 6307 207 96541  
FR151 17998 -0180 18565 3440 6308 208 96542  
FR152 17999 -0180 18566 3441 6309 209 96543  
FR153 18000 -0180 18567 3442 6310 210 96544  
FR154 18001 -0180 18568 3443 6311 211 96545  
FR155 18002 -0180 18569 3444 6312 212 96546  
FR156 18003 -0180 18570 3445 6313 213 96547  
FR157 18004 -0180 18571 3446 6314 214 96548  
FR158 18005 -0180 18572 3447 6315 215 96549  
FR159 18006 -0180 18573 3448 6316 216 96550  
FR160 18007 -0180 18574 3449 6317 217 96551  
FR161 18008 -0180 18575 3450 6318 218 96552  
FR162 18009 -0180 18576 3451 6319 219 96553  
FR163 18010 -0180 18577 3452 6320 220 96554  
FR164 18011 -0180 18578 3453 6321 221 96555  
FR165 18012 -0180 18579 3454 6322 222 96556  
FR166 18013 -0180 18580 3455 6323 223 96557  
FR167 18014 -0180 18581 3456 6324 224 96558  
FR168 18015 -0180 18582 3457 6325 225 96559  
FR169 18016 -0180 18583 3458 6326 226 96560  
FR170 18017 -0180 18584 3459 6327 227 96561  
FR171 18018 -0180 18585 3460 6328 228 96562  
FR172 18019 -0180 18586 3461 6329 229 96563  
FR173 18020 -0180 18587 3462 6330 230 96564  
FR174 18021 -0180 18588 3463 6331 231 96565  
FR175 18022 -0180 18589 3464 6332 232 96566  
FR176 18023 -0180 18590 3465 6333 233 96567  
FR177 18024 -0180 18591 3466 6334 234 96568  
FR178 18025 -0180 18592 3467 6335 235 96569  
FR179 18026 -0180 18593 3468 6336 236 96570  
FR180 18027 -0180 18594 3469 6337 237 96571  
FR181 18028 -0180 18595 3470 6338 238 96572  
FR182 18029 -0180 18596 3471 6339 239 96573  
FR183 18030 -0180 18597 3472 6340 240 96574  
FR184 18031 -0180 18598 3473 6341 241 96575  
FR185 18032 -0180 18599 3474 6342 242 96576  
FR186 18033 -0180 18600 3475 6343 243 96577  
FR187 18034 -0180 18601 3476 6344 244 96578  
FR188 18035 -0180 18602 3477 6345 245 96579  
FR189 18036 -0180 18603 3478 6346 246 96580  
FR190 18037 -0180 18604 3479 6347 247 96581  
FR191 18038 -0180 18605 3480 6348 248 96582  
FR192 18039 -0180 18606 3481 6349 249 96583  
FR193 18040 -0180 18607 3482 6350 250 96584  
FR194 18041 -0180 18608 3483 6351 251 96585  
FR195 18042 -0180 18609 3484 6352 252 96586  
FR196 18043 -0180 18610 3485 6353 253 96587  
FR197 18044 -0180 18611 3486 6354 254 96588  
FR198 18045 -0180 18612 3487 6355 255 96589  
FR199 18046 -0180 18613 3488 6356 256 96590  
FR200 18047 -0180 18614 3489 6357 257 96591  
FR201 18048 -0180 18615 3490 6358 258 96592  
FR202 18049 -0180 18616 3491 6359 259 96593  
FR203 18050 -0180 18617 3492 6360 260 96594  
FR204 18051 -0180 18618 3493 6361 261 96595  
FR205 18052 -0180 18619 3494 6362 262 96596  
FR206 18053 -0180 18620 3495 6363 263 96597  
FR207 18054 -0180 18621 3496 6364 264 96598  
FR208 18055 -0180 18622 3497 6365 265 96599  
FR209 18056 -0180 18623 3498 6366 266 96600  
FR210 18057 -0180 18624 3499 6367 267 96601  
FR211 18058 -0180 18625 3500 6368 268 96602  
FR212 18059 -0180 18626 3501 6369 269 96603  
FR213 18060 -0180 18627 3502 6370 270 96604  
FR214 18061 -0180 18628 3503 6371 271 96605  
FR215 18062 -0180 18629 3504 6372 272 96606  
FR216 18063 -0180 18630 3505 6373 273 96607  
FR217 18064 -0180 18631 3506 6374 274 96608  
FR218 18065 -0180 18632 3507 6375 275 96609  
FR219 18066 -0180 18633 3508 6376 276 96610  
FR220 18067 -0180 18634 3509 6377 277 96611  
FR221 18068 -0180 18635 3510 6378 278 96612  
FR222 18069 -0180 18636 3511 6379 279 96613  
FR223 18070 -0180 18637 3512 6380 280 96614  
FR224 18071 -0180 18638 3513 6381 281 96615  
FR225 18072 -0180 18639 3514 6382 282 96616  
FR226 18073 -0180 18640 3515 6383 283 96617  
FR227 18074 -0180 18641 3516 6384 284 96618  
FR228 18075 -0180 18642 3517 6385 285 96619  
FR229 18076 -0180 18643 3518 6386 286 96620  
FR230 18077 -0180 18644 3519 6387 287 96621  
FR231 18078 -0180 18645 3520 6388 288 96622  
FR232 18079 -0180 18646 3521 6389 289 96623  
FR233 18080 -0180 18647 3522 6390 290 96624  
FR234 18081 -0180 18648 3523 6391 291 96625  
FR235 18082 -0180 18649 3524 6392 292 96626  
FR236 18083 -0180 18650 3525 6393 293 96627  
FR237 18084 -0180 18651 3526 6394 294 96628  
FR238 18085 -0180 18652 3527 6395 295 96629  
FR239 18086 -0180 18653 3528 6396 296 96630  
FR240 18087 -0180 18654 3529 6397 297 96631  
FR241 18088 -0180 18655 3530 6398 298 96632  
FR242 18089 -0180 18656 3531 6399 299 96633  
FR243 18090 -0180 18657 3532 6400 300 96634  
FR244 18091 -0180 18658 3533 6401 301 96635  
FR245 18092 -0180 18659 3534 6402 302 96636  
FR246 18093 -0180 18660 3535 6403 303 96637  
FR247 18094 -0180 18661 3536 6404 304 96638  
FR248 18095 -0180 18662 3537 6405 305 96639  
FR249 18096 -0180 18663 3538 6406 306 96640  
FR250 18097 -0180 18664 3539 6407 307 96641  
FR251 18098 -0180 18665 3540 6408 308 96642  
FR252 18099 -0180 18666 3541 6409 309 96643  
FR253 18100 -0180 18667 3542 6410 310 96644  
FR254 18101 -0180 18668 3543 6411 311 96645  
FR255 18102 -0180 18669 3544 6412 312 96646  
FR256 18103 -0180 18670 3545 6413 313 96647  
FR257 18104 -0180 18671 3546 6414 314 96648  
FR258 18105 -0180 18672 3547 6415 315 96649  
FR259 18106 -0180 18673 3548 6416 316 96650  
FR260 18107 -0180 18674 3549 6417 317 96651  
FR261 18108 -0180 18675 3550 6418 318 96652  
FR262 18109 -0180 18676 3551 6419 319 96653  
FR263 18110 -0180 18677 3552 6420 320 96654  
FR264 18111 -0180 18678 3553 6421 321 96655  
FR265 18112 -0180 18679 3554 6422 322 96656  
FR266 18113 -0180 18680 3555 6423 323 96657  
FR267 18114 -0180 18681 3556 6424 324 96658  
FR268 18115 -0180 18682 3557 6425 325 96659  
FR269 18116 -0180 18683 3558 6426 326 96660  
FR270 18117 -0180 18684 3559 6427 327 96661  
FR271 18118 -0180 18685 3560 6428 328 96662  
FR272 18119 -0180 18686 3561 6429 329 96663  
FR273 18120 -0180 18687 3562 6430 330 96664  
FR274 18121 -0180 18688 3563 6431 331 96665  
FR275 18122 -0180 18689 3564 6432 332 96666  
FR276 18123 -0180 18690 3565 6433 333 96667  
FR277 18124 -0180 18691 3566 6434 334 96668  
FR278 18125 -0180 18692 3567 6435 335 96669  
FR279 18126 -0180 18693 3568 6436 336 96670  
FR280 18127 -0180 18694 3569 6437 337 96671  
FR281 18128 -0180 18695 3570 6438 338 96672  
FR282 18129 -0180 18696 3571 6439 339 96673  
FR283 18130 -0180 18697 3572 6440 340 96674  
FR284 18131 -0180 18698 3573 6441 341 96675  
FR285 18132 -0180 18699 3574 6442 342 96676  
FR286 18133 -0180 18700 3575 6443 343 96677  
FR287 18134 -0180 18701 3576 6444 344 96678  
FR288 18135 -0180 18702 3577 6445 345 96679  
FR289 18136 -0180 18703 3578 6446 346 96680  
FR290 18137 -0180 18704 3579 6447 347 96681  
FR291 18138 -0180 18705 3580 6448 348 96682  
FR292 18139 -0180 18706 3581 6449 349 96683  
FR293 18140 -0180 18707 3582 6450 350 96684  
FR294 18141 -0180 18708 3583 6451 351 96685  
FR295 1

GP8B 13629 -1808 14071 1466 1404 72729
GP9B 13629 -1808 14071 1466 1404 72729
GP10B 13629 -1808 14071 1466 1404 72729
...
GP98B 13629 -1808 14071 1466 1404 72729









**Table-S5: ICI signature genes A and B**

| Symbol     | Group                 |
|------------|-----------------------|
| A2M        | ICI signature genes A |
| AADAC      | ICI signature genes B |
| ABCA3      | ICI signature genes A |
| ABCA6      | ICI signature genes B |
| ABCA8      | ICI signature genes B |
| ABCD2      | ICI signature genes B |
| ABI3       | ICI signature genes A |
| ABI3BP     | ICI signature genes A |
| AC002463.1 | ICI signature genes B |
| AC003006.1 | ICI signature genes B |
| AC004160.1 | ICI signature genes B |
| AC004494.1 | ICI signature genes B |
| AC004585.1 | ICI signature genes A |
| AC004687.1 | ICI signature genes A |
| AC004847.1 | ICI signature genes A |
| AC004866.2 | ICI signature genes B |
| AC004921.1 | ICI signature genes B |
| AC004988.1 | ICI signature genes B |
| AC005064.1 | ICI signature genes B |
| AC005204.1 | ICI signature genes B |
| AC005336.1 | ICI signature genes B |
| AC005515.1 | ICI signature genes B |
| AC005549.1 | ICI signature genes B |
| AC005722.3 | ICI signature genes B |
| AC005747.1 | ICI signature genes A |
| AC006033.2 | ICI signature genes B |
| AC006328.1 | ICI signature genes B |
| AC006369.1 | ICI signature genes B |
| AC006390.1 | ICI signature genes B |
| AC007159.1 | ICI signature genes B |
| AC007278.1 | ICI signature genes B |
| AC007384.1 | ICI signature genes B |
| AC007569.1 | ICI signature genes B |
| AC007728.2 | ICI signature genes B |
| AC007991.2 | ICI signature genes B |
| AC008011.2 | ICI signature genes B |
| AC008033.3 | ICI signature genes B |
| AC008105.3 | ICI signature genes A |
| AC008268.1 | ICI signature genes B |
| AC008517.1 | ICI signature genes B |
| AC008620.2 | ICI signature genes B |
| AC008760.2 | ICI signature genes B |
| AC008957.1 | ICI signature genes B |
| AC009055.2 | ICI signature genes B |
| AC009093.1 | ICI signature genes B |
| AC009133.3 | ICI signature genes B |
| AC010086.2 | ICI signature genes B |
| AC010247.2 | ICI signature genes B |
| AC010451.3 | ICI signature genes B |
| AC010587.2 | ICI signature genes B |
| AC010991.1 | ICI signature genes B |
| AC011511.5 | ICI signature genes B |
| AC011897.1 | ICI signature genes B |
| AC011899.2 | ICI signature genes B |
| AC012236.1 | ICI signature genes A |
| AC012645.3 | ICI signature genes B |

|            |                       |
|------------|-----------------------|
| AC015911.3 | ICI signature genes B |
| AC015911.7 | ICI signature genes A |
| AC015911.8 | ICI signature genes B |
| AC018717.1 | ICI signature genes B |
| AC018730.4 | ICI signature genes B |
| AC018755.4 | ICI signature genes A |
| AC018767.2 | ICI signature genes B |
| AC019103.1 | ICI signature genes B |
| AC019176.1 | ICI signature genes B |
| AC020659.1 | ICI signature genes B |
| AC021205.2 | ICI signature genes B |
| AC022126.1 | ICI signature genes B |
| AC022164.1 | ICI signature genes B |
| AC022509.2 | ICI signature genes B |
| AC023301.1 | ICI signature genes B |
| AC023824.4 | ICI signature genes B |
| AC024257.3 | ICI signature genes B |
| AC024560.2 | ICI signature genes B |
| AC026369.3 | ICI signature genes A |
| AC026396.1 | ICI signature genes B |
| AC027250.1 | ICI signature genes B |
| AC027541.1 | ICI signature genes B |
| AC034105.1 | ICI signature genes A |
| AC034199.1 | ICI signature genes B |
| AC034238.2 | ICI signature genes B |
| AC037198.1 | ICI signature genes B |
| AC041040.1 | ICI signature genes B |
| AC055748.1 | ICI signature genes B |
| AC064805.1 | ICI signature genes B |
| AC066614.1 | ICI signature genes B |
| AC068756.1 | ICI signature genes B |
| AC069228.1 | ICI signature genes B |
| AC073429.2 | ICI signature genes B |
| AC074052.2 | ICI signature genes B |
| AC079298.3 | ICI signature genes B |
| AC079325.6 | ICI signature genes B |
| AC087283.2 | ICI signature genes B |
| AC087286.2 | ICI signature genes B |
| AC090079.2 | ICI signature genes B |
| AC090125.1 | ICI signature genes B |
| AC090136.3 | ICI signature genes B |
| AC090559.1 | ICI signature genes B |
| AC091817.1 | ICI signature genes B |
| AC091820.2 | ICI signature genes B |
| AC091941.1 | ICI signature genes B |
| AC092145.1 | ICI signature genes B |
| AC092439.1 | ICI signature genes B |
| AC092634.2 | ICI signature genes B |
| AC092865.2 | ICI signature genes B |
| AC093496.1 | ICI signature genes B |
| AC093583.1 | ICI signature genes B |
| AC093716.1 | ICI signature genes B |
| AC093730.1 | ICI signature genes B |
| AC096531.2 | ICI signature genes B |
| AC096734.1 | ICI signature genes B |
| AC097521.1 | ICI signature genes B |
| AC099066.2 | ICI signature genes B |
| AC099511.1 | ICI signature genes B |

|            |                       |
|------------|-----------------------|
| AC099524.1 | ICI signature genes B |
| AC103563.1 | ICI signature genes A |
| AC103563.3 | ICI signature genes A |
| AC105460.1 | ICI signature genes B |
| AC105914.1 | ICI signature genes B |
| AC106771.1 | ICI signature genes B |
| AC106881.1 | ICI signature genes B |
| AC106882.1 | ICI signature genes B |
| AC106901.1 | ICI signature genes B |
| AC108082.1 | ICI signature genes B |
| AC108868.2 | ICI signature genes B |
| AC110285.2 | ICI signature genes B |
| AC110995.1 | ICI signature genes B |
| AC111000.3 | ICI signature genes B |
| AC111149.2 | ICI signature genes B |
| AC112721.1 | ICI signature genes B |
| AC112721.2 | ICI signature genes B |
| AC113346.1 | ICI signature genes B |
| AC114485.1 | ICI signature genes B |
| AC114489.2 | ICI signature genes B |
| AC114741.1 | ICI signature genes B |
| AC114812.2 | ICI signature genes B |
| AC117500.5 | ICI signature genes B |
| AC117569.1 | ICI signature genes B |
| AC118282.4 | ICI signature genes B |
| AC119044.1 | ICI signature genes B |
| AC121342.1 | ICI signature genes B |
| AC124944.1 | ICI signature genes B |
| AC126177.1 | ICI signature genes B |
| AC127521.1 | ICI signature genes B |
| AC131055.2 | ICI signature genes B |
| AC133065.3 | ICI signature genes A |
| AC133644.2 | ICI signature genes B |
| AC134312.5 | ICI signature genes B |
| AC134879.2 | ICI signature genes A |
| AC135068.2 | ICI signature genes A |
| AC135068.8 | ICI signature genes A |
| AC136428.1 | ICI signature genes A |
| AC139491.2 | ICI signature genes B |
| AC139491.3 | ICI signature genes B |
| AC142381.1 | ICI signature genes A |
| AC145098.1 | ICI signature genes A |
| AC147651.4 | ICI signature genes A |
| AC233280.2 | ICI signature genes B |
| AC233702.5 | ICI signature genes B |
| AC237221.2 | ICI signature genes B |
| AC239802.1 | ICI signature genes B |
| AC242852.2 | ICI signature genes B |
| AC243829.4 | ICI signature genes B |
| AC243960.1 | ICI signature genes A |
| AC243960.3 | ICI signature genes B |
| AC244205.1 | ICI signature genes B |
| AC244250.2 | ICI signature genes A |
| AC244250.4 | ICI signature genes A |
| AC245088.1 | ICI signature genes B |
| AC245128.3 | ICI signature genes B |
| AC245297.1 | ICI signature genes A |
| AC245505.3 | ICI signature genes B |

|             |                       |
|-------------|-----------------------|
| AC246787.2  | ICI signature genes B |
| AC246787.3  | ICI signature genes A |
| AC246787.4  | ICI signature genes A |
| ACKR1       | ICI signature genes A |
| ACOD1       | ICI signature genes B |
| ACOXL       | ICI signature genes B |
| ACSL5       | ICI signature genes A |
| ACSL6       | ICI signature genes B |
| ACSM5       | ICI signature genes B |
| ACTA2       | ICI signature genes A |
| ACTA2-AS1   | ICI signature genes B |
| ACTG1P22    | ICI signature genes B |
| ACTG2       | ICI signature genes A |
| ADA2        | ICI signature genes A |
| ADAM12      | ICI signature genes A |
| ADAM19      | ICI signature genes A |
| ADAM8       | ICI signature genes A |
| ADAMDEC1    | ICI signature genes A |
| ADAMTS12    | ICI signature genes A |
| ADAMTS16    | ICI signature genes A |
| ADAMTS2     | ICI signature genes A |
| ADAMTS4     | ICI signature genes A |
| ADAMTS5     | ICI signature genes B |
| ADAMTS7P4   | ICI signature genes B |
| ADAMTS8     | ICI signature genes B |
| ADAMTS9-AS1 | ICI signature genes B |
| ADCY2       | ICI signature genes B |
| ADCYAP1     | ICI signature genes B |
| ADGRE1      | ICI signature genes B |
| ADGRE2      | ICI signature genes A |
| ADGRE3      | ICI signature genes B |
| ADGRE4P     | ICI signature genes B |
| ADGRG5      | ICI signature genes A |
| ADH1B       | ICI signature genes A |
| ADH7        | ICI signature genes B |
| ADORA1      | ICI signature genes B |
| ADRA1B      | ICI signature genes B |
| ADRA2A      | ICI signature genes A |
| AEBP1       | ICI signature genes A |
| AF127936.1  | ICI signature genes B |
| AF127936.5  | ICI signature genes B |
| AF165138.7  | ICI signature genes B |
| AGER        | ICI signature genes A |
| AGTR1       | ICI signature genes B |
| AICDA       | ICI signature genes B |
| AIF1        | ICI signature genes A |
| AIM2        | ICI signature genes A |
| AK5         | ICI signature genes B |
| AKAP2       | ICI signature genes B |
| AKR1B10     | ICI signature genes B |
| AKR1B10P1   | ICI signature genes B |
| AKR1C1      | ICI signature genes B |
| AKR1C2      | ICI signature genes B |
| AKR1C3      | ICI signature genes B |
| AKR1C4      | ICI signature genes B |
| AL021395.1  | ICI signature genes B |
| AL023653.1  | ICI signature genes B |
| AL031595.1  | ICI signature genes B |

|            |                       |
|------------|-----------------------|
| AL031713.1 | ICI signature genes B |
| AL031767.1 | ICI signature genes B |
| AL031846.1 | ICI signature genes B |
| AL033397.1 | ICI signature genes B |
| AL033397.2 | ICI signature genes B |
| AL035425.4 | ICI signature genes B |
| AL049649.1 | ICI signature genes B |
| AL079307.2 | ICI signature genes B |
| AL096816.1 | ICI signature genes B |
| AL109918.1 | ICI signature genes B |
| AL121985.1 | ICI signature genes B |
| AL122127.2 | ICI signature genes A |
| AL133325.3 | ICI signature genes B |
| AL133371.2 | ICI signature genes A |
| AL133410.1 | ICI signature genes B |
| AL133467.1 | ICI signature genes A |
| AL135929.1 | ICI signature genes B |
| AL137186.1 | ICI signature genes B |
| AL138745.1 | ICI signature genes B |
| AL138826.1 | ICI signature genes B |
| AL139125.1 | ICI signature genes B |
| AL139147.1 | ICI signature genes B |
| AL139246.3 | ICI signature genes B |
| AL157871.2 | ICI signature genes B |
| AL158071.3 | ICI signature genes B |
| AL159987.2 | ICI signature genes B |
| AL161431.1 | ICI signature genes B |
| AL162414.1 | ICI signature genes B |
| AL353093.1 | ICI signature genes B |
| AL355143.1 | ICI signature genes B |
| AL356277.2 | ICI signature genes B |
| AL356417.2 | ICI signature genes B |
| AL356750.1 | ICI signature genes B |
| AL357033.3 | ICI signature genes B |
| AL359792.1 | ICI signature genes B |
| AL365361.1 | ICI signature genes A |
| AL390816.3 | ICI signature genes B |
| AL391358.1 | ICI signature genes B |
| AL391427.1 | ICI signature genes B |
| AL391427.3 | ICI signature genes B |
| AL442635.1 | ICI signature genes B |
| AL512306.2 | ICI signature genes B |
| AL589863.1 | ICI signature genes B |
| AL589987.1 | ICI signature genes B |
| AL590290.1 | ICI signature genes B |
| AL590422.1 | ICI signature genes B |
| AL590764.1 | ICI signature genes B |
| AL592309.2 | ICI signature genes B |
| AL606807.1 | ICI signature genes B |
| AL691447.2 | ICI signature genes B |
| AL845311.1 | ICI signature genes B |
| AL928768.3 | ICI signature genes A |
| ALDH3A1    | ICI signature genes B |
| ALOX5      | ICI signature genes A |
| ALOX5AP    | ICI signature genes A |
| ALPK2      | ICI signature genes B |
| ALPP       | ICI signature genes B |
| AMPD1      | ICI signature genes B |



|             |                       |
|-------------|-----------------------|
| AMTN        | ICI signature genes B |
| ANGPTL1     | ICI signature genes B |
| ANGPTL2     | ICI signature genes A |
| ANK2        | ICI signature genes B |
| ANKRD1      | ICI signature genes A |
| ANKRD18B    | ICI signature genes B |
| ANKRD36BP2  | ICI signature genes A |
| ANKRD44-AS1 | ICI signature genes A |
| ANKRD55     | ICI signature genes B |
| ANO5        | ICI signature genes B |
| ANTXRPL1    | ICI signature genes B |
| ANXA6       | ICI signature genes A |
| AOAH        | ICI signature genes A |
| AOC3        | ICI signature genes A |
| AOX1        | ICI signature genes A |
| AP000892.4  | ICI signature genes B |
| AP001107.5  | ICI signature genes B |
| AP001189.3  | ICI signature genes B |
| AP001434.1  | ICI signature genes B |
| AP001604.1  | ICI signature genes B |
| AP001652.1  | ICI signature genes B |
| AP003071.4  | ICI signature genes B |
| AP003119.1  | ICI signature genes B |
| AP004550.1  | ICI signature genes B |
| AP005357.1  | ICI signature genes B |
| AP005380.1  | ICI signature genes B |
| APBB1IP     | ICI signature genes A |
| APCDD1L     | ICI signature genes B |
| APCDD1L-DT  | ICI signature genes B |
| APELA       | ICI signature genes B |
| APLNR       | ICI signature genes A |
| APOA4       | ICI signature genes B |
| APOC1       | ICI signature genes A |
| APOC1P1     | ICI signature genes B |
| APOC2       | ICI signature genes B |
| APOE        | ICI signature genes A |
| APOL3       | ICI signature genes A |
| AQP4        | ICI signature genes A |
| AQP9        | ICI signature genes A |
| ARHGAP15    | ICI signature genes A |
| ARHGAP31    | ICI signature genes A |
| ARHGAP6     | ICI signature genes B |
| ARHGAP9     | ICI signature genes A |
| ARHGEF38    | ICI signature genes B |
| ARHGEF6     | ICI signature genes A |
| ARMH1       | ICI signature genes B |
| ARRDC5      | ICI signature genes B |
| ART4        | ICI signature genes B |
| ARTN        | ICI signature genes B |
| ASGR2       | ICI signature genes B |
| ASPN        | ICI signature genes A |
| ASXL3       | ICI signature genes B |
| ATP10A      | ICI signature genes A |
| ATP13A4-AS1 | ICI signature genes B |
| ATP6V0D2    | ICI signature genes A |
| ATP8A1      | ICI signature genes A |
| ATP8B4      | ICI signature genes B |
| AXL         | ICI signature genes A |

|            |                       |
|------------|-----------------------|
| B3GAT1     | ICI signature genes B |
| BAAT       | ICI signature genes B |
| BATF       | ICI signature genes A |
| BATF2      | ICI signature genes A |
| BCL2A1     | ICI signature genes A |
| BCL2L14    | ICI signature genes B |
| BCORP1     | ICI signature genes B |
| BFSP2      | ICI signature genes B |
| BGN        | ICI signature genes A |
| BHLHE22    | ICI signature genes B |
| BHLHE41    | ICI signature genes A |
| BICC1      | ICI signature genes A |
| BIN2       | ICI signature genes A |
| BIRC3      | ICI signature genes A |
| BIRC7      | ICI signature genes B |
| BLK        | ICI signature genes A |
| BMP5       | ICI signature genes B |
| BNC2       | ICI signature genes B |
| BNIP3P6    | ICI signature genes B |
| BRINP3     | ICI signature genes B |
| BST1       | ICI signature genes B |
| BTK        | ICI signature genes A |
| BTLA       | ICI signature genes B |
| BX088651.2 | ICI signature genes B |
| C11orf21   | ICI signature genes B |
| C11orf96   | ICI signature genes A |
| C15orf48   | ICI signature genes A |
| C16orf54   | ICI signature genes A |
| C16orf89   | ICI signature genes A |
| C19orf38   | ICI signature genes A |
| C1orf162   | ICI signature genes A |
| C1orf61    | ICI signature genes B |
| C1QA       | ICI signature genes A |
| C1QB       | ICI signature genes A |
| C1QC       | ICI signature genes A |
| C1QTNF1    | ICI signature genes A |
| C1QTNF3    | ICI signature genes A |
| C1QTNF7    | ICI signature genes B |
| C1S        | ICI signature genes A |
| C2         | ICI signature genes A |
| C3         | ICI signature genes A |
| C3AR1      | ICI signature genes A |
| C3orf80    | ICI signature genes B |
| C4B        | ICI signature genes A |
| C4BPA      | ICI signature genes A |
| C4BPB      | ICI signature genes B |
| C5AR1      | ICI signature genes A |
| C5AR2      | ICI signature genes B |
| C5orf46    | ICI signature genes B |
| C7         | ICI signature genes A |
| C9orf139   | ICI signature genes B |
| CA12       | ICI signature genes B |
| CA4        | ICI signature genes B |
| CACNA1B    | ICI signature genes B |
| CADM3      | ICI signature genes A |
| CALHM5     | ICI signature genes B |
| CALHM6     | ICI signature genes A |
| CAMK1G     | ICI signature genes B |

|          |                       |
|----------|-----------------------|
| CAPN6    | ICI signature genes A |
| CAPN8    | ICI signature genes A |
| CARMIL2  | ICI signature genes A |
| CASC19   | ICI signature genes B |
| CASKIN1  | ICI signature genes B |
| CASP14   | ICI signature genes B |
| CASP5    | ICI signature genes B |
| CASS4    | ICI signature genes A |
| CATSPER1 | ICI signature genes B |
| CBLN4    | ICI signature genes B |
| CCAT1    | ICI signature genes B |
| CCBE1    | ICI signature genes B |
| CCDC141  | ICI signature genes B |
| CCDC162P | ICI signature genes B |
| CCDC170  | ICI signature genes A |
| CCDC69   | ICI signature genes A |
| CCDC8    | ICI signature genes B |
| CCDC80   | ICI signature genes A |
| CCL11    | ICI signature genes A |
| CCL13    | ICI signature genes A |
| CCL14    | ICI signature genes B |
| CCL18    | ICI signature genes A |
| CCL19    | ICI signature genes A |
| CCL2     | ICI signature genes A |
| CCL21    | ICI signature genes A |
| CCL22    | ICI signature genes A |
| CCL23    | ICI signature genes A |
| CCL25    | ICI signature genes B |
| CCL3     | ICI signature genes A |
| CCL3L3   | ICI signature genes A |
| CCL4     | ICI signature genes A |
| CCL4L2   | ICI signature genes A |
| CCL5     | ICI signature genes A |
| CCL7     | ICI signature genes B |
| CCL8     | ICI signature genes A |
| CCN1     | ICI signature genes A |
| CCN2     | ICI signature genes A |
| CCN4     | ICI signature genes A |
| CCN5     | ICI signature genes A |
| CCR1     | ICI signature genes A |
| CCR2     | ICI signature genes A |
| CCR4     | ICI signature genes A |
| CCR5     | ICI signature genes A |
| CCR5AS   | ICI signature genes B |
| CCR6     | ICI signature genes B |
| CCR7     | ICI signature genes A |
| CCR8     | ICI signature genes B |
| CCRL2    | ICI signature genes A |
| CD14     | ICI signature genes A |
| CD163    | ICI signature genes A |
| CD180    | ICI signature genes A |
| CD19     | ICI signature genes A |
| CD1B     | ICI signature genes B |
| CD1C     | ICI signature genes A |
| CD1E     | ICI signature genes A |
| CD2      | ICI signature genes A |
| CD209    | ICI signature genes A |
| CD22     | ICI signature genes A |

|          |                       |
|----------|-----------------------|
| CD226    | ICI signature genes B |
| CD244    | ICI signature genes B |
| CD247    | ICI signature genes A |
| CD248    | ICI signature genes A |
| CD27     | ICI signature genes A |
| CD28     | ICI signature genes A |
| CD300A   | ICI signature genes A |
| CD300C   | ICI signature genes A |
| CD300E   | ICI signature genes A |
| CD300LB  | ICI signature genes B |
| CD300LF  | ICI signature genes A |
| CD300LG  | ICI signature genes B |
| CD33     | ICI signature genes B |
| CD37     | ICI signature genes A |
| CD3D     | ICI signature genes A |
| CD3E     | ICI signature genes A |
| CD3G     | ICI signature genes A |
| CD4      | ICI signature genes A |
| CD40LG   | ICI signature genes A |
| CD48     | ICI signature genes A |
| CD5      | ICI signature genes A |
| CD52     | ICI signature genes A |
| CD53     | ICI signature genes A |
| CD6      | ICI signature genes A |
| CD69     | ICI signature genes A |
| CD7      | ICI signature genes A |
| CD70     | ICI signature genes A |
| CD72     | ICI signature genes A |
| CD74     | ICI signature genes A |
| CD79A    | ICI signature genes A |
| CD79B    | ICI signature genes A |
| CD80     | ICI signature genes B |
| CD84     | ICI signature genes A |
| CD86     | ICI signature genes A |
| CD8A     | ICI signature genes A |
| CD8B     | ICI signature genes A |
| CD93     | ICI signature genes A |
| CD96     | ICI signature genes A |
| CDH11    | ICI signature genes A |
| CDH13    | ICI signature genes B |
| CDH2     | ICI signature genes B |
| CDH8     | ICI signature genes B |
| CDK15    | ICI signature genes B |
| CDO1     | ICI signature genes B |
| CEACAM21 | ICI signature genes A |
| CEACAM4  | ICI signature genes B |
| CEL      | ICI signature genes B |
| CELF2    | ICI signature genes A |
| CES1P2   | ICI signature genes B |
| CFAP221  | ICI signature genes B |
| CFP      | ICI signature genes A |
| CHEK2P5  | ICI signature genes B |
| CHGA     | ICI signature genes B |
| CHI3L1   | ICI signature genes A |
| CHI3L2   | ICI signature genes A |
| CHIA     | ICI signature genes B |
| CHIAP2   | ICI signature genes B |
| CHIT1    | ICI signature genes A |

|           |                       |
|-----------|-----------------------|
| CHP2      | ICI signature genes B |
| CHRD1     | ICI signature genes A |
| CHRD2     | ICI signature genes A |
| CHRM3-AS2 | ICI signature genes B |
| CHRNA1    | ICI signature genes B |
| CHRNA6    | ICI signature genes B |
| CHST11    | ICI signature genes A |
| CIITA     | ICI signature genes A |
| CILP      | ICI signature genes A |
| CILP2     | ICI signature genes A |
| CKMT1A    | ICI signature genes B |
| CKMT1B    | ICI signature genes B |
| CLC       | ICI signature genes B |
| CLDN18    | ICI signature genes A |
| CLEC10A   | ICI signature genes A |
| CLEC12A   | ICI signature genes A |
| CLEC12B   | ICI signature genes B |
| CLEC17A   | ICI signature genes A |
| CLEC1A    | ICI signature genes A |
| CLEC4A    | ICI signature genes A |
| CLEC4C    | ICI signature genes B |
| CLEC4D    | ICI signature genes B |
| CLEC4E    | ICI signature genes A |
| CLEC4G    | ICI signature genes B |
| CLEC5A    | ICI signature genes A |
| CLEC6A    | ICI signature genes B |
| CLEC7A    | ICI signature genes A |
| CLEC9A    | ICI signature genes B |
| CLECL1    | ICI signature genes B |
| CLIC5     | ICI signature genes A |
| CLMP      | ICI signature genes A |
| CLNK      | ICI signature genes B |
| CLSTN2    | ICI signature genes B |
| CMKLR1    | ICI signature genes A |
| CNN1      | ICI signature genes A |
| CNN2P11   | ICI signature genes B |
| CNNM1     | ICI signature genes B |
| CNR2      | ICI signature genes B |
| CNRIP1    | ICI signature genes A |
| CNTN3     | ICI signature genes B |
| CNTN6     | ICI signature genes B |
| COL10A1   | ICI signature genes A |
| COL11A1   | ICI signature genes A |
| COL12A1   | ICI signature genes A |
| COL14A1   | ICI signature genes A |
| COL15A1   | ICI signature genes A |
| COL16A1   | ICI signature genes A |
| COL17A1   | ICI signature genes B |
| COL1A1    | ICI signature genes A |
| COL1A2    | ICI signature genes A |
| COL22A1   | ICI signature genes B |
| COL2A1    | ICI signature genes B |
| COL3A1    | ICI signature genes A |
| COL4A3    | ICI signature genes A |
| COL4A4    | ICI signature genes A |
| COL5A1    | ICI signature genes A |
| COL5A2    | ICI signature genes A |
| COL5A3    | ICI signature genes A |

|              |                       |
|--------------|-----------------------|
| COL6A1       | ICI signature genes A |
| COL6A2       | ICI signature genes A |
| COL6A3       | ICI signature genes A |
| COL6A5       | ICI signature genes B |
| COL6A6       | ICI signature genes A |
| COL8A1       | ICI signature genes A |
| COL8A2       | ICI signature genes A |
| COLEC12      | ICI signature genes A |
| COMP         | ICI signature genes A |
| COPDA1       | ICI signature genes A |
| CORIN        | ICI signature genes B |
| CORO1A       | ICI signature genes A |
| CPA3         | ICI signature genes A |
| CPA4         | ICI signature genes B |
| CPED1        | ICI signature genes B |
| CPLX2        | ICI signature genes B |
| CPM          | ICI signature genes A |
| CPNE5        | ICI signature genes A |
| CPXM1        | ICI signature genes A |
| CPZ          | ICI signature genes B |
| CR1          | ICI signature genes B |
| CR1L         | ICI signature genes B |
| CR2          | ICI signature genes A |
| CR381572.1   | ICI signature genes B |
| CRB2         | ICI signature genes B |
| CREB3L1      | ICI signature genes A |
| CRHR2        | ICI signature genes B |
| CRIP1        | ICI signature genes A |
| CRISPLD2     | ICI signature genes A |
| CRTAM        | ICI signature genes A |
| CRYBB1       | ICI signature genes B |
| CSDC2        | ICI signature genes B |
| CSF1R        | ICI signature genes A |
| CSF2         | ICI signature genes B |
| CSF2RA       | ICI signature genes A |
| CSF2RB       | ICI signature genes A |
| CSF3R        | ICI signature genes A |
| CSMD2        | ICI signature genes B |
| CSPG4        | ICI signature genes B |
| CST1         | ICI signature genes A |
| CST7         | ICI signature genes A |
| CTC-251116.1 | ICI signature genes A |
| CTCFL        | ICI signature genes B |
| CTHRC1       | ICI signature genes A |
| CTLA4        | ICI signature genes A |
| CTSE         | ICI signature genes A |
| CTSK         | ICI signature genes A |
| CTSS         | ICI signature genes A |
| CTSW         | ICI signature genes A |
| CX3CR1       | ICI signature genes B |
| CXCL10       | ICI signature genes A |
| CXCL11       | ICI signature genes A |
| CXCL12       | ICI signature genes A |
| CXCL13       | ICI signature genes A |
| CXCL5        | ICI signature genes A |
| CXCL9        | ICI signature genes A |
| CXCR1        | ICI signature genes B |
| CXCR2P1      | ICI signature genes A |

|          |                       |
|----------|-----------------------|
| CXCR3    | ICI signature genes A |
| CXCR4    | ICI signature genes A |
| CXCR5    | ICI signature genes B |
| CXCR6    | ICI signature genes A |
| CXorf21  | ICI signature genes A |
| CXorf65  | ICI signature genes B |
| CYBB     | ICI signature genes A |
| CYP1B1   | ICI signature genes A |
| CYP27A1  | ICI signature genes A |
| CYP2B7P  | ICI signature genes A |
| CYP4B1   | ICI signature genes A |
| CYP4F11  | ICI signature genes B |
| CYP4F26P | ICI signature genes B |
| CYP4F29P | ICI signature genes B |
| CYP4F3   | ICI signature genes B |
| CYP4F35P | ICI signature genes B |
| CYS1     | ICI signature genes B |
| CYSLTR1  | ICI signature genes A |
| CYTH4    | ICI signature genes A |
| CYTIP    | ICI signature genes A |
| CYTL1    | ICI signature genes A |
| DAAM2    | ICI signature genes A |
| DAB2     | ICI signature genes A |
| DACT1    | ICI signature genes A |
| DACT3    | ICI signature genes B |
| DBH      | ICI signature genes B |
| DBH-AS1  | ICI signature genes A |
| DCN      | ICI signature genes A |
| DCSTAMP  | ICI signature genes B |
| DDO      | ICI signature genes B |
| DDR2     | ICI signature genes A |
| DEFA11P  | ICI signature genes B |
| DEFA7P   | ICI signature genes B |
| DEPP1    | ICI signature genes A |
| DERL3    | ICI signature genes A |
| DES      | ICI signature genes A |
| DIO2     | ICI signature genes B |
| DIO3     | ICI signature genes B |
| DIPK1C   | ICI signature genes B |
| DKK2     | ICI signature genes B |
| DLC1     | ICI signature genes A |
| DLG2     | ICI signature genes B |
| DLX1     | ICI signature genes B |
| DLX2     | ICI signature genes B |
| DLX6-AS1 | ICI signature genes B |
| DMBT1    | ICI signature genes A |
| DMRT2    | ICI signature genes B |
| DMRT3    | ICI signature genes B |
| DMRTA2   | ICI signature genes B |
| DNAH8    | ICI signature genes B |
| DNAJB3   | ICI signature genes B |
| DNAJC5B  | ICI signature genes B |
| DNASE2B  | ICI signature genes B |
| DNM3OS   | ICI signature genes B |
| DOCK10   | ICI signature genes A |
| DOCK11   | ICI signature genes A |
| DOCK2    | ICI signature genes A |
| DOCK8    | ICI signature genes A |

|             |                       |
|-------------|-----------------------|
| DOK2        | ICI signature genes A |
| DOK3        | ICI signature genes A |
| DOK5        | ICI signature genes B |
| DPEP1       | ICI signature genes A |
| DPEP2       | ICI signature genes A |
| DPP4        | ICI signature genes A |
| DPT         | ICI signature genes A |
| DTHD1       | ICI signature genes B |
| DTNB-AS1    | ICI signature genes A |
| EBI3        | ICI signature genes A |
| ECM2        | ICI signature genes A |
| EDNRA       | ICI signature genes A |
| ELN         | ICI signature genes A |
| EMB         | ICI signature genes A |
| EMILIN1     | ICI signature genes A |
| EMILIN3     | ICI signature genes B |
| EML4-AS1    | ICI signature genes B |
| EMX2        | ICI signature genes B |
| EMX2OS      | ICI signature genes B |
| ENPP2       | ICI signature genes A |
| ENPP6       | ICI signature genes B |
| EOMES       | ICI signature genes A |
| EPHA10      | ICI signature genes B |
| EPSTI1      | ICI signature genes A |
| EPYC        | ICI signature genes B |
| EREG        | ICI signature genes B |
| ERVMER61-1  | ICI signature genes B |
| ESR1        | ICI signature genes B |
| ETS1        | ICI signature genes A |
| EVA1A       | ICI signature genes A |
| EVI2A       | ICI signature genes A |
| EVI2B       | ICI signature genes A |
| EVPLL       | ICI signature genes B |
| EXOC3L4     | ICI signature genes A |
| F13A1       | ICI signature genes A |
| F5          | ICI signature genes A |
| FABP3P2     | ICI signature genes B |
| FABP4       | ICI signature genes B |
| FADS6       | ICI signature genes B |
| FAM107A     | ICI signature genes A |
| FAM155A     | ICI signature genes B |
| FAM180A     | ICI signature genes B |
| FAM198B-AS1 | ICI signature genes B |
| FAM20A      | ICI signature genes A |
| FAM216B     | ICI signature genes A |
| FAM30A      | ICI signature genes A |
| FAM3B       | ICI signature genes B |
| FAM78A      | ICI signature genes A |
| FAM92B      | ICI signature genes A |
| FAP         | ICI signature genes A |
| FAR2P1      | ICI signature genes B |
| FASLG       | ICI signature genes A |
| FAT2        | ICI signature genes B |
| FAT4        | ICI signature genes B |
| FBLN2       | ICI signature genes A |
| FBLN5       | ICI signature genes A |
| FBN1        | ICI signature genes A |
| FBP1        | ICI signature genes A |



|         |                       |
|---------|-----------------------|
| FCAR    | ICI signature genes B |
| FCER1A  | ICI signature genes A |
| FCER1G  | ICI signature genes A |
| FCER2   | ICI signature genes A |
| FCGR1A  | ICI signature genes A |
| FCGR1B  | ICI signature genes B |
| FCGR1CP | ICI signature genes B |
| FCGR2A  | ICI signature genes A |
| FCGR2B  | ICI signature genes A |
| FCGR2C  | ICI signature genes A |
| FCGR3A  | ICI signature genes A |
| FCGR3B  | ICI signature genes A |
| FCMR    | ICI signature genes A |
| FCN1    | ICI signature genes A |
| FCRL1   | ICI signature genes A |
| FCRL2   | ICI signature genes A |
| FCRL3   | ICI signature genes A |
| FCRL4   | ICI signature genes B |
| FCRL5   | ICI signature genes A |
| FCRL6   | ICI signature genes B |
| FCRLA   | ICI signature genes A |
| FDCSP   | ICI signature genes A |
| FERMT3  | ICI signature genes A |
| FEZF1   | ICI signature genes B |
| FFAR4   | ICI signature genes B |
| FGA     | ICI signature genes A |
| FGD2    | ICI signature genes A |
| FGD5    | ICI signature genes A |
| FGF10   | ICI signature genes B |
| FGF5    | ICI signature genes B |
| FGF7    | ICI signature genes A |
| FGG     | ICI signature genes A |
| FGL2    | ICI signature genes A |
| FGR     | ICI signature genes A |
| FHL5    | ICI signature genes B |
| FIBCD1  | ICI signature genes B |
| FIBIN   | ICI signature genes A |
| FILIP1L | ICI signature genes A |
| FLI1    | ICI signature genes A |
| FLT3    | ICI signature genes B |
| FMOD    | ICI signature genes A |
| FN1     | ICI signature genes A |
| FNDC1   | ICI signature genes A |
| FOLR1   | ICI signature genes A |
| FOLR2   | ICI signature genes A |
| FOXC2   | ICI signature genes B |
| FOXH1   | ICI signature genes B |
| FOXL2   | ICI signature genes B |
| FOXP3   | ICI signature genes A |
| FPR1    | ICI signature genes A |
| FPR2    | ICI signature genes B |
| FPR3    | ICI signature genes A |
| FREM2   | ICI signature genes B |
| FTH1P14 | ICI signature genes B |
| FTH1P22 | ICI signature genes A |
| FUT7    | ICI signature genes B |
| FXD2    | ICI signature genes B |
| FYB1    | ICI signature genes A |

|          |                       |
|----------|-----------------------|
| G0S2     | ICI signature genes A |
| GAB3     | ICI signature genes A |
| GACAT1   | ICI signature genes B |
| GALNT15  | ICI signature genes B |
| GALNT17  | ICI signature genes B |
| GAPT     | ICI signature genes A |
| GAS1     | ICI signature genes A |
| GASK1B   | ICI signature genes A |
| GBP1     | ICI signature genes A |
| GBP4     | ICI signature genes A |
| GBP5     | ICI signature genes A |
| GCSAML   | ICI signature genes B |
| GDF10    | ICI signature genes B |
| GDNF     | ICI signature genes B |
| GEM      | ICI signature genes A |
| GFPT2    | ICI signature genes A |
| GFRA1    | ICI signature genes B |
| GGTA1P   | ICI signature genes A |
| GGTLC1   | ICI signature genes A |
| GIMAP1   | ICI signature genes A |
| GIMAP2   | ICI signature genes A |
| GIMAP4   | ICI signature genes A |
| GIMAP5   | ICI signature genes B |
| GIMAP6   | ICI signature genes A |
| GIMAP7   | ICI signature genes A |
| GIMAP8   | ICI signature genes A |
| GJA5     | ICI signature genes A |
| GJB2     | ICI signature genes B |
| GJB6     | ICI signature genes B |
| GKN2     | ICI signature genes A |
| GLIS1    | ICI signature genes B |
| GLT8D2   | ICI signature genes A |
| GMFG     | ICI signature genes A |
| GNG2     | ICI signature genes A |
| GNGT2    | ICI signature genes A |
| GNLY     | ICI signature genes A |
| GOLGA6L7 | ICI signature genes B |
| GOLGA8EP | ICI signature genes B |
| GOLT1A   | ICI signature genes B |
| GP5      | ICI signature genes B |
| GPA33    | ICI signature genes B |
| GPC6     | ICI signature genes A |
| GPIHBP1  | ICI signature genes A |
| GPM6A    | ICI signature genes B |
| GPR1     | ICI signature genes B |
| GPR132   | ICI signature genes A |
| GPR141   | ICI signature genes B |
| GPR15    | ICI signature genes A |
| GPR171   | ICI signature genes A |
| GPR174   | ICI signature genes A |
| GPR18    | ICI signature genes A |
| GPR183   | ICI signature genes A |
| GPR25    | ICI signature genes B |
| GPR34    | ICI signature genes A |
| GPR55    | ICI signature genes B |
| GPR65    | ICI signature genes A |
| GPR68    | ICI signature genes A |
| GPR82    | ICI signature genes B |

|              |                       |
|--------------|-----------------------|
| GPR84        | ICI signature genes A |
| GPR88        | ICI signature genes B |
| GPRIN3       | ICI signature genes A |
| GPSM3        | ICI signature genes A |
| GPX2         | ICI signature genes B |
| GRAP         | ICI signature genes B |
| GRAP2        | ICI signature genes B |
| GREM1        | ICI signature genes A |
| GRIA3        | ICI signature genes B |
| GRP          | ICI signature genes B |
| GSTA1        | ICI signature genes B |
| GSTA8P       | ICI signature genes B |
| GSTA9P       | ICI signature genes B |
| GUCA1A       | ICI signature genes B |
| GVINP1       | ICI signature genes A |
| GXYLT2       | ICI signature genes A |
| GYPC         | ICI signature genes A |
| GZMA         | ICI signature genes A |
| GZMB         | ICI signature genes A |
| GZMH         | ICI signature genes A |
| GZMK         | ICI signature genes A |
| GZMM         | ICI signature genes A |
| H2AB2        | ICI signature genes B |
| HAMP         | ICI signature genes B |
| HAP1         | ICI signature genes B |
| HAPLN1       | ICI signature genes B |
| HAS1         | ICI signature genes B |
| HAS2         | ICI signature genes A |
| HAVCR2       | ICI signature genes A |
| HCFC2P1      | ICI signature genes B |
| HCST         | ICI signature genes A |
| HEATR9       | ICI signature genes B |
| HECW2-AS1    | ICI signature genes B |
| HEPH         | ICI signature genes A |
| HEPHL1       | ICI signature genes B |
| HGF          | ICI signature genes B |
| HHIP         | ICI signature genes B |
| HK3          | ICI signature genes A |
| HLA-DMA      | ICI signature genes A |
| HLA-DMB      | ICI signature genes A |
| HLA-DOA      | ICI signature genes A |
| HLA-DOB      | ICI signature genes A |
| HLA-DPA1     | ICI signature genes A |
| HLA-DPA3     | ICI signature genes B |
| HLA-DPB1     | ICI signature genes A |
| HLA-DPB2     | ICI signature genes A |
| HLA-DQA1     | ICI signature genes A |
| HLA-DQA2     | ICI signature genes A |
| HLA-DQB1     | ICI signature genes A |
| HLA-DQB1-AS1 | ICI signature genes A |
| HLA-DQB2     | ICI signature genes A |
| HLA-DRA      | ICI signature genes A |
| HLA-DRB1     | ICI signature genes A |
| HLA-DRB5     | ICI signature genes A |
| HLA-DRB6     | ICI signature genes A |
| HMCN1        | ICI signature genes A |
| HMGA1P7      | ICI signature genes B |
| HNF1B        | ICI signature genes B |

|             |                       |
|-------------|-----------------------|
| HNMT        | ICI signature genes A |
| HNRNPA1P21  | ICI signature genes A |
| HP          | ICI signature genes A |
| HPGDS       | ICI signature genes A |
| HRH2        | ICI signature genes B |
| HS3ST2      | ICI signature genes A |
| HSD11B1     | ICI signature genes A |
| HSH2D       | ICI signature genes A |
| HSPB3       | ICI signature genes B |
| HSPB7       | ICI signature genes B |
| HTR1B       | ICI signature genes B |
| HTR2A       | ICI signature genes B |
| HTRA3       | ICI signature genes A |
| HTRA4       | ICI signature genes A |
| ICAM1       | ICI signature genes A |
| ICAM2       | ICI signature genes A |
| ICAM3       | ICI signature genes A |
| ICOS        | ICI signature genes A |
| IDO1        | ICI signature genes A |
| IDO2        | ICI signature genes B |
| IFI44L      | ICI signature genes A |
| IFNA12P     | ICI signature genes B |
| IFNG        | ICI signature genes A |
| IFNG-AS1    | ICI signature genes B |
| IFNWP5      | ICI signature genes B |
| IGF1        | ICI signature genes B |
| IGF2        | ICI signature genes B |
| IGFL2       | ICI signature genes A |
| IGFL2-AS1   | ICI signature genes B |
| IGFL3       | ICI signature genes B |
| IGHA1       | ICI signature genes A |
| IGHA2       | ICI signature genes A |
| IGHD        | ICI signature genes A |
| IGHE        | ICI signature genes A |
| IGHG1       | ICI signature genes A |
| IGHG2       | ICI signature genes A |
| IGHG3       | ICI signature genes A |
| IGHG4       | ICI signature genes A |
| IGHGP       | ICI signature genes A |
| IGHJ1       | ICI signature genes A |
| IGHJ2       | ICI signature genes A |
| IGHJ3       | ICI signature genes A |
| IGHJ3P      | ICI signature genes A |
| IGHM        | ICI signature genes A |
| IGHV1-12    | ICI signature genes A |
| IGHV1-14    | ICI signature genes A |
| IGHV1-17    | ICI signature genes A |
| IGHV1-18    | ICI signature genes A |
| IGHV1-2     | ICI signature genes A |
| IGHV1-24    | ICI signature genes A |
| IGHV1-3     | ICI signature genes A |
| IGHV1-45    | ICI signature genes A |
| IGHV1-46    | ICI signature genes A |
| IGHV1-58    | ICI signature genes A |
| IGHV1-67    | ICI signature genes A |
| IGHV1-69    | ICI signature genes A |
| IGHV1-69D   | ICI signature genes A |
| IGHV1OR15-2 | ICI signature genes A |

|              |                       |
|--------------|-----------------------|
| IGHV1OR15-9  | ICI signature genes A |
| IGHV1OR16-1  | ICI signature genes A |
| IGHV1OR16-3  | ICI signature genes A |
| IGHV1OR21-1  | ICI signature genes A |
| IGHV2-26     | ICI signature genes A |
| IGHV2-5      | ICI signature genes A |
| IGHV2-70     | ICI signature genes A |
| IGHV2-70D    | ICI signature genes A |
| IGHV3-11     | ICI signature genes A |
| IGHV3-13     | ICI signature genes A |
| IGHV3-15     | ICI signature genes A |
| IGHV3-19     | ICI signature genes A |
| IGHV3-20     | ICI signature genes A |
| IGHV3-21     | ICI signature genes A |
| IGHV3-22     | ICI signature genes A |
| IGHV3-23     | ICI signature genes A |
| IGHV3-30     | ICI signature genes A |
| IGHV3-33     | ICI signature genes A |
| IGHV3-35     | ICI signature genes A |
| IGHV3-38     | ICI signature genes A |
| IGHV3-41     | ICI signature genes A |
| IGHV3-43     | ICI signature genes A |
| IGHV3-47     | ICI signature genes A |
| IGHV3-48     | ICI signature genes A |
| IGHV3-49     | ICI signature genes A |
| IGHV3-52     | ICI signature genes A |
| IGHV3-53     | ICI signature genes A |
| IGHV3-60     | ICI signature genes A |
| IGHV3-62     | ICI signature genes A |
| IGHV3-63     | ICI signature genes A |
| IGHV3-64     | ICI signature genes A |
| IGHV3-66     | ICI signature genes A |
| IGHV3-7      | ICI signature genes A |
| IGHV3-71     | ICI signature genes A |
| IGHV3-72     | ICI signature genes A |
| IGHV3-73     | ICI signature genes A |
| IGHV3-74     | ICI signature genes A |
| IGHV3-75     | ICI signature genes A |
| IGHV3-76     | ICI signature genes A |
| IGHV3OR15-7  | ICI signature genes A |
| IGHV3OR16-10 | ICI signature genes A |
| IGHV3OR16-11 | ICI signature genes A |
| IGHV3OR16-12 | ICI signature genes A |
| IGHV3OR16-13 | ICI signature genes A |
| IGHV3OR16-6  | ICI signature genes A |
| IGHV3OR16-8  | ICI signature genes A |
| IGHV3OR16-9  | ICI signature genes A |
| IGHV4-28     | ICI signature genes A |
| IGHV4-31     | ICI signature genes A |
| IGHV4-34     | ICI signature genes A |
| IGHV4-39     | ICI signature genes A |
| IGHV4-4      | ICI signature genes A |
| IGHV4-55     | ICI signature genes A |
| IGHV4-59     | ICI signature genes A |
| IGHV4-61     | ICI signature genes A |
| IGHV4OR15-8  | ICI signature genes A |
| IGHV5-51     | ICI signature genes A |
| IGHV5-78     | ICI signature genes A |

|              |                       |
|--------------|-----------------------|
| IGHV6-1      | ICI signature genes A |
| IGHV7-56     | ICI signature genes A |
| IGHV7-81     | ICI signature genes A |
| IGKC         | ICI signature genes A |
| IGKJ5        | ICI signature genes A |
| IGKV1-12     | ICI signature genes A |
| IGKV1-13     | ICI signature genes A |
| IGKV1-16     | ICI signature genes A |
| IGKV1-17     | ICI signature genes A |
| IGKV1-27     | ICI signature genes A |
| IGKV1-33     | ICI signature genes A |
| IGKV1-39     | ICI signature genes A |
| IGKV1-5      | ICI signature genes A |
| IGKV1-6      | ICI signature genes A |
| IGKV1-8      | ICI signature genes A |
| IGKV1-9      | ICI signature genes A |
| IGKV1D-12    | ICI signature genes A |
| IGKV1D-13    | ICI signature genes A |
| IGKV1D-16    | ICI signature genes A |
| IGKV1D-17    | ICI signature genes A |
| IGKV1D-27    | ICI signature genes A |
| IGKV1D-33    | ICI signature genes A |
| IGKV1D-39    | ICI signature genes A |
| IGKV1D-42    | ICI signature genes A |
| IGKV1D-43    | ICI signature genes A |
| IGKV1D-8     | ICI signature genes A |
| IGKV1OR10-1  | ICI signature genes A |
| IGKV1OR2-108 | ICI signature genes A |
| IGKV1OR2-11  | ICI signature genes A |
| IGKV1OR2-3   | ICI signature genes A |
| IGKV1OR2-6   | ICI signature genes A |
| IGKV1OR22-1  | ICI signature genes A |
| IGKV1OR22-5  | ICI signature genes A |
| IGKV2-24     | ICI signature genes A |
| IGKV2-28     | ICI signature genes A |
| IGKV2-29     | ICI signature genes A |
| IGKV2-30     | ICI signature genes A |
| IGKV2D-24    | ICI signature genes A |
| IGKV2D-28    | ICI signature genes A |
| IGKV2D-29    | ICI signature genes A |
| IGKV2D-30    | ICI signature genes A |
| IGKV2D-40    | ICI signature genes A |
| IGKV2OR22-3  | ICI signature genes A |
| IGKV2OR22-4  | ICI signature genes A |
| IGKV3-11     | ICI signature genes A |
| IGKV3-15     | ICI signature genes A |
| IGKV3-20     | ICI signature genes A |
| IGKV3-7      | ICI signature genes A |
| IGKV3D-11    | ICI signature genes A |
| IGKV3D-15    | ICI signature genes A |
| IGKV3D-20    | ICI signature genes A |
| IGKV3D-7     | ICI signature genes A |
| IGKV3OR2-268 | ICI signature genes A |
| IGKV3OR2-5   | ICI signature genes A |
| IGKV4-1      | ICI signature genes A |
| IGKV5-2      | ICI signature genes A |
| IGKV6-21     | ICI signature genes A |
| IGKV6D-21    | ICI signature genes A |

|            |                       |
|------------|-----------------------|
| IGKV7-3    | ICI signature genes A |
| IGLC2      | ICI signature genes A |
| IGLC3      | ICI signature genes A |
| IGLC6      | ICI signature genes A |
| IGLC7      | ICI signature genes A |
| IGLJ2      | ICI signature genes A |
| IGLJCOR18  | ICI signature genes A |
| IGLL1      | ICI signature genes A |
| IGLL3P     | ICI signature genes A |
| IGLL5      | ICI signature genes A |
| IGLON5     | ICI signature genes B |
| IGLV1-36   | ICI signature genes A |
| IGLV1-40   | ICI signature genes A |
| IGLV1-41   | ICI signature genes A |
| IGLV1-44   | ICI signature genes A |
| IGLV1-47   | ICI signature genes A |
| IGLV1-50   | ICI signature genes A |
| IGLV1-51   | ICI signature genes A |
| IGLV10-54  | ICI signature genes A |
| IGLV2-11   | ICI signature genes A |
| IGLV2-14   | ICI signature genes A |
| IGLV2-18   | ICI signature genes A |
| IGLV2-23   | ICI signature genes A |
| IGLV2-28   | ICI signature genes A |
| IGLV2-33   | ICI signature genes A |
| IGLV2-34   | ICI signature genes A |
| IGLV2-5    | ICI signature genes A |
| IGLV2-8    | ICI signature genes A |
| IGLV3-1    | ICI signature genes A |
| IGLV3-10   | ICI signature genes A |
| IGLV3-12   | ICI signature genes A |
| IGLV3-16   | ICI signature genes A |
| IGLV3-19   | ICI signature genes A |
| IGLV3-21   | ICI signature genes A |
| IGLV3-25   | ICI signature genes A |
| IGLV3-27   | ICI signature genes A |
| IGLV3-9    | ICI signature genes A |
| IGLV4-3    | ICI signature genes A |
| IGLV4-60   | ICI signature genes A |
| IGLV4-69   | ICI signature genes A |
| IGLV5-37   | ICI signature genes A |
| IGLV5-45   | ICI signature genes A |
| IGLV5-48   | ICI signature genes A |
| IGLV6-57   | ICI signature genes A |
| IGLV7-43   | ICI signature genes A |
| IGLV7-46   | ICI signature genes A |
| IGLV8-61   | ICI signature genes A |
| IGLV8OR8-1 | ICI signature genes B |
| IGLV9-49   | ICI signature genes A |
| IGLVI-70   | ICI signature genes A |
| IGSF21     | ICI signature genes B |
| IGSF6      | ICI signature genes A |
| IKZF1      | ICI signature genes A |
| IKZF3      | ICI signature genes A |
| IL10       | ICI signature genes B |
| IL10RA     | ICI signature genes A |
| IL11       | ICI signature genes B |
| IL12B      | ICI signature genes B |

|           |                       |
|-----------|-----------------------|
| IL12RB1   | ICI signature genes A |
| IL13      | ICI signature genes B |
| IL13RA2   | ICI signature genes A |
| IL16      | ICI signature genes A |
| IL17A     | ICI signature genes B |
| IL17REL   | ICI signature genes A |
| IL18RAP   | ICI signature genes B |
| IL1A      | ICI signature genes B |
| IL1RL1    | ICI signature genes A |
| IL21      | ICI signature genes B |
| IL21-AS1  | ICI signature genes B |
| IL21R     | ICI signature genes A |
| IL22RA2   | ICI signature genes B |
| IL27      | ICI signature genes B |
| IL2RA     | ICI signature genes A |
| IL2RB     | ICI signature genes A |
| IL2RG     | ICI signature genes A |
| IL32      | ICI signature genes A |
| IL36B     | ICI signature genes B |
| IL36G     | ICI signature genes B |
| IL36RN    | ICI signature genes B |
| IL4I1     | ICI signature genes A |
| IL5RA     | ICI signature genes B |
| IL7R      | ICI signature genes A |
| IL9R      | ICI signature genes B |
| INHBA     | ICI signature genes A |
| INHBA-AS1 | ICI signature genes B |
| INMT      | ICI signature genes A |
| INPP5D    | ICI signature genes A |
| INSYN2B   | ICI signature genes B |
| IQGAP2    | ICI signature genes A |
| IQSEC3    | ICI signature genes B |
| IRAK3     | ICI signature genes A |
| IRF4      | ICI signature genes A |
| IRF8      | ICI signature genes A |
| IRS4      | ICI signature genes B |
| ISLR      | ICI signature genes A |
| ISM1      | ICI signature genes A |
| ISM2      | ICI signature genes B |
| ITGA11    | ICI signature genes A |
| ITGA8     | ICI signature genes A |
| ITGAD     | ICI signature genes B |
| ITGAL     | ICI signature genes A |
| ITGAM     | ICI signature genes A |
| ITGAX     | ICI signature genes A |
| ITGB2     | ICI signature genes A |
| ITGB2-AS1 | ICI signature genes A |
| ITGB3     | ICI signature genes B |
| ITGB7     | ICI signature genes A |
| ITGBL1    | ICI signature genes A |
| ITIH3     | ICI signature genes B |
| ITIH5     | ICI signature genes A |
| ITK       | ICI signature genes A |
| ITLN1     | ICI signature genes B |
| ITM2A     | ICI signature genes A |
| JAK3      | ICI signature genes A |
| JAKMIP1   | ICI signature genes B |
| JAML      | ICI signature genes A |



|             |                       |
|-------------|-----------------------|
| JCHAIN      | ICI signature genes A |
| JPH2        | ICI signature genes B |
| JSRP1       | ICI signature genes A |
| KANK4       | ICI signature genes B |
| KBTBD12     | ICI signature genes B |
| KCNA1       | ICI signature genes B |
| KCNA2       | ICI signature genes B |
| KCNA3       | ICI signature genes A |
| KCNA4       | ICI signature genes B |
| KCNA5       | ICI signature genes B |
| KCND2       | ICI signature genes B |
| KCNE4       | ICI signature genes A |
| KCNIP1      | ICI signature genes B |
| KCNJ10      | ICI signature genes B |
| KCNJ5       | ICI signature genes A |
| KCNMB1      | ICI signature genes B |
| KCNN3       | ICI signature genes B |
| KCNT2       | ICI signature genes B |
| KEL         | ICI signature genes A |
| KERA        | ICI signature genes B |
| KHDRBS2     | ICI signature genes B |
| KIAA1549L   | ICI signature genes B |
| KIAA1755    | ICI signature genes B |
| KIF26B      | ICI signature genes A |
| KIR2DL4     | ICI signature genes B |
| KIR2DS4     | ICI signature genes B |
| KIR3DL3     | ICI signature genes B |
| KIR3DX1     | ICI signature genes B |
| KLHDC7B     | ICI signature genes A |
| KLHL6       | ICI signature genes A |
| KLK8        | ICI signature genes B |
| KLRB1       | ICI signature genes A |
| KLRC1       | ICI signature genes B |
| KLRC2       | ICI signature genes B |
| KLRC4       | ICI signature genes B |
| KLRC4-KLRK1 | ICI signature genes B |
| KLRD1       | ICI signature genes B |
| KLRG1       | ICI signature genes B |
| KLRK1       | ICI signature genes B |
| KMO         | ICI signature genes B |
| KRT14       | ICI signature genes B |
| KRT16P4     | ICI signature genes B |
| KRT16P6     | ICI signature genes B |
| KRT17       | ICI signature genes B |
| KRT23       | ICI signature genes B |
| KRT5        | ICI signature genes B |
| KRT7        | ICI signature genes A |
| KRT7-AS     | ICI signature genes B |
| KRT75       | ICI signature genes B |
| KRTAP19-8   | ICI signature genes B |
| L1TD1       | ICI signature genes B |
| L3MBTL4-AS1 | ICI signature genes B |
| LAG3        | ICI signature genes A |
| LAIR1       | ICI signature genes A |
| LAIR2       | ICI signature genes B |
| LAMA1       | ICI signature genes B |
| LAMA2       | ICI signature genes A |
| LAMA4       | ICI signature genes A |

|            |                       |
|------------|-----------------------|
| LAMC2      | ICI signature genes B |
| LAMP5      | ICI signature genes A |
| LAPTM5     | ICI signature genes A |
| LAT2       | ICI signature genes A |
| LAX1       | ICI signature genes A |
| LCK        | ICI signature genes A |
| LCP1       | ICI signature genes A |
| LCP2       | ICI signature genes A |
| LGALS1     | ICI signature genes A |
| LGALS2     | ICI signature genes A |
| LGI2       | ICI signature genes A |
| LGR5       | ICI signature genes B |
| LHX8       | ICI signature genes B |
| LILRA1     | ICI signature genes B |
| LILRA2     | ICI signature genes B |
| LILRA4     | ICI signature genes B |
| LILRA5     | ICI signature genes A |
| LILRA6     | ICI signature genes A |
| LILRB1     | ICI signature genes A |
| LILRB2     | ICI signature genes A |
| LILRB3     | ICI signature genes A |
| LILRB4     | ICI signature genes A |
| LILRB5     | ICI signature genes B |
| LILRP2     | ICI signature genes B |
| LINC00051  | ICI signature genes B |
| LINC00158  | ICI signature genes B |
| LINC00221  | ICI signature genes B |
| LINC002481 | ICI signature genes B |
| LINC00299  | ICI signature genes B |
| LINC00402  | ICI signature genes B |
| LINC00426  | ICI signature genes B |
| LINC00460  | ICI signature genes B |
| LINC00525  | ICI signature genes B |
| LINC00551  | ICI signature genes B |
| LINC00582  | ICI signature genes A |
| LINC00607  | ICI signature genes B |
| LINC00626  | ICI signature genes B |
| LINC00702  | ICI signature genes B |
| LINC00861  | ICI signature genes B |
| LINC00871  | ICI signature genes B |
| LINC00877  | ICI signature genes B |
| LINC00892  | ICI signature genes B |
| LINC00898  | ICI signature genes B |
| LINC00922  | ICI signature genes B |
| LINC00937  | ICI signature genes B |
| LINC00939  | ICI signature genes B |
| LINC00944  | ICI signature genes B |
| LINC00968  | ICI signature genes B |
| LINC00996  | ICI signature genes B |
| LINC01038  | ICI signature genes B |
| LINC01094  | ICI signature genes A |
| LINC01133  | ICI signature genes B |
| LINC01146  | ICI signature genes B |
| LINC01150  | ICI signature genes B |
| LINC01194  | ICI signature genes B |
| LINC01205  | ICI signature genes B |
| LINC01215  | ICI signature genes A |
| LINC01228  | ICI signature genes B |

|           |                       |
|-----------|-----------------------|
| LINC01231 | ICI signature genes B |
| LINC01234 | ICI signature genes B |
| LINC01235 | ICI signature genes B |
| LINC01241 | ICI signature genes B |
| LINC01281 | ICI signature genes B |
| LINC01326 | ICI signature genes B |
| LINC01358 | ICI signature genes B |
| LINC01446 | ICI signature genes B |
| LINC01480 | ICI signature genes A |
| LINC01561 | ICI signature genes B |
| LINC01564 | ICI signature genes B |
| LINC01605 | ICI signature genes B |
| LINC01614 | ICI signature genes A |
| LINC01615 | ICI signature genes B |
| LINC01628 | ICI signature genes B |
| LINC01638 | ICI signature genes B |
| LINC01665 | ICI signature genes B |
| LINC01684 | ICI signature genes B |
| LINC01697 | ICI signature genes B |
| LINC01705 | ICI signature genes B |
| LINC01711 | ICI signature genes B |
| LINC01776 | ICI signature genes B |
| LINC01781 | ICI signature genes A |
| LINC01853 | ICI signature genes B |
| LINC01857 | ICI signature genes A |
| LINC01871 | ICI signature genes A |
| LINC01886 | ICI signature genes B |
| LINC01914 | ICI signature genes B |
| LINC01915 | ICI signature genes B |
| LINC01925 | ICI signature genes B |
| LINC01929 | ICI signature genes B |
| LINC01934 | ICI signature genes B |
| LINC01936 | ICI signature genes B |
| LINC01937 | ICI signature genes B |
| LINC01943 | ICI signature genes B |
| LINC01996 | ICI signature genes B |
| LINC01997 | ICI signature genes B |
| LINC02016 | ICI signature genes B |
| LINC02057 | ICI signature genes B |
| LINC02063 | ICI signature genes B |
| LINC02084 | ICI signature genes B |
| LINC02099 | ICI signature genes B |
| LINC02114 | ICI signature genes B |
| LINC02126 | ICI signature genes B |
| LINC02195 | ICI signature genes A |
| LINC02257 | ICI signature genes B |
| LINC02273 | ICI signature genes B |
| LINC02285 | ICI signature genes B |
| LINC02303 | ICI signature genes B |
| LINC02327 | ICI signature genes B |
| LINC02345 | ICI signature genes B |
| LINC02362 | ICI signature genes A |
| LINC02384 | ICI signature genes A |
| LINC02397 | ICI signature genes B |
| LINC02408 | ICI signature genes B |
| LINC02422 | ICI signature genes B |
| LINC02423 | ICI signature genes B |
| LINC02446 | ICI signature genes A |

|           |                       |
|-----------|-----------------------|
| LINC02500 | ICI signature genes B |
| LINC02525 | ICI signature genes B |
| LINC02528 | ICI signature genes B |
| LINC02544 | ICI signature genes B |
| LINC02576 | ICI signature genes A |
| LINC02588 | ICI signature genes B |
| LINC02611 | ICI signature genes B |
| LINC02619 | ICI signature genes B |
| LINC02694 | ICI signature genes B |
| LINC02699 | ICI signature genes B |
| LINC02778 | ICI signature genes B |
| LIPC      | ICI signature genes B |
| LMO3      | ICI signature genes A |
| LMOD1     | ICI signature genes A |
| LNCOG     | ICI signature genes B |
| LOXL2     | ICI signature genes A |
| LPAR4     | ICI signature genes B |
| LPL       | ICI signature genes A |
| LPXN      | ICI signature genes A |
| LRRC15    | ICI signature genes A |
| LRRC17    | ICI signature genes A |
| LRRC2     | ICI signature genes B |
| LRRC25    | ICI signature genes A |
| LRRC32    | ICI signature genes A |
| LRRC4C    | ICI signature genes B |
| LRRC55    | ICI signature genes B |
| LRRK2     | ICI signature genes A |
| LRRK2-DT  | ICI signature genes A |
| LRRN4     | ICI signature genes A |
| LSAMP     | ICI signature genes A |
| LSP1      | ICI signature genes A |
| LST1      | ICI signature genes A |
| LTA       | ICI signature genes A |
| LTB       | ICI signature genes A |
| LTF       | ICI signature genes A |
| LUM       | ICI signature genes A |
| LY6H      | ICI signature genes B |
| LY86      | ICI signature genes A |
| LY9       | ICI signature genes A |
| LY96      | ICI signature genes A |
| LYVE1     | ICI signature genes A |
| LYZ       | ICI signature genes A |
| M1AP      | ICI signature genes B |
| MAGEA6    | ICI signature genes B |
| MAGEL2    | ICI signature genes B |
| MAGI2-AS3 | ICI signature genes B |
| MAL       | ICI signature genes A |
| MAMDC2    | ICI signature genes A |
| MAN1A1    | ICI signature genes A |
| MAP1LC3C  | ICI signature genes B |
| MAP4K1    | ICI signature genes A |
| MARCO     | ICI signature genes A |
| MATN3     | ICI signature genes A |
| MCCC1-AS1 | ICI signature genes B |
| MCEMP1    | ICI signature genes A |
| MCHR1     | ICI signature genes B |
| MEDAG     | ICI signature genes A |
| MEF2C     | ICI signature genes A |

|           |                       |
|-----------|-----------------------|
| MEF2C-AS1 | ICI signature genes B |
| MEFV      | ICI signature genes B |
| MEI1      | ICI signature genes A |
| MEOX2     | ICI signature genes A |
| MFAP4     | ICI signature genes A |
| MFAP5     | ICI signature genes B |
| MGP       | ICI signature genes A |
| MICAL2    | ICI signature genes A |
| MILR1     | ICI signature genes A |
| MIR100HG  | ICI signature genes B |
| MIR155HG  | ICI signature genes A |
| MIR3142HG | ICI signature genes B |
| MIR3945HG | ICI signature genes B |
| MIR4314   | ICI signature genes B |
| MIR4537   | ICI signature genes A |
| MIR4539   | ICI signature genes A |
| MIR670HG  | ICI signature genes B |
| MIR8071-2 | ICI signature genes A |
| MLLT10P2  | ICI signature genes B |
| MME       | ICI signature genes B |
| MMP1      | ICI signature genes B |
| MMP10     | ICI signature genes B |
| MMP11     | ICI signature genes A |
| MMP12     | ICI signature genes A |
| MMP13     | ICI signature genes A |
| MMP16     | ICI signature genes B |
| MMP19     | ICI signature genes A |
| MMP2      | ICI signature genes A |
| MMP2-AS1  | ICI signature genes B |
| MMP28     | ICI signature genes B |
| MMP3      | ICI signature genes B |
| MMP7      | ICI signature genes A |
| MMP8      | ICI signature genes B |
| MMP9      | ICI signature genes A |
| MMRN1     | ICI signature genes A |
| MNDA      | ICI signature genes A |
| MOXD1     | ICI signature genes A |
| MPEG1     | ICI signature genes A |
| MPPED1    | ICI signature genes B |
| MRC1      | ICI signature genes A |
| MRGPRF    | ICI signature genes A |
| MRGPRG    | ICI signature genes B |
| MRPL50P1  | ICI signature genes B |
| MRPS10P1  | ICI signature genes B |
| MRV11     | ICI signature genes A |
| MS4A1     | ICI signature genes A |
| MS4A14    | ICI signature genes B |
| MS4A15    | ICI signature genes A |
| MS4A2     | ICI signature genes B |
| MS4A4A    | ICI signature genes A |
| MS4A6A    | ICI signature genes A |
| MS4A7     | ICI signature genes A |
| MSLN      | ICI signature genes A |
| MSR1      | ICI signature genes A |
| MSRB3     | ICI signature genes A |
| MT1M      | ICI signature genes A |
| MUCL3     | ICI signature genes B |
| MXRA5     | ICI signature genes A |

|         |                       |
|---------|-----------------------|
| MXRA5Y  | ICI signature genes B |
| MXRA8   | ICI signature genes A |
| MYBPC2  | ICI signature genes B |
| MYL3    | ICI signature genes B |
| MYO1F   | ICI signature genes A |
| MYO1G   | ICI signature genes A |
| MYOCD   | ICI signature genes B |
| MZB1    | ICI signature genes A |
| NAIP    | ICI signature genes B |
| NAIPP1  | ICI signature genes B |
| NALCN   | ICI signature genes B |
| NAPSA   | ICI signature genes A |
| NAPSB   | ICI signature genes A |
| NAV3    | ICI signature genes B |
| NCAM2   | ICI signature genes B |
| NCF1    | ICI signature genes A |
| NCF1B   | ICI signature genes A |
| NCF1C   | ICI signature genes A |
| NCF4    | ICI signature genes A |
| NCKAP1L | ICI signature genes A |
| NCR1    | ICI signature genes B |
| NCR3    | ICI signature genes A |
| NDNF    | ICI signature genes A |
| NECAB2  | ICI signature genes B |
| NEFL    | ICI signature genes B |
| NEGR1   | ICI signature genes B |
| NELL1   | ICI signature genes B |
| NETO1   | ICI signature genes B |
| NEXN    | ICI signature genes A |
| NF1P8   | ICI signature genes B |
| NFAM1   | ICI signature genes A |
| NFATC2  | ICI signature genes A |
| NIBAN3  | ICI signature genes A |
| NID2    | ICI signature genes A |
| NKAIN2  | ICI signature genes B |
| NKG7    | ICI signature genes A |
| NKX2-1  | ICI signature genes A |
| NKX3-2  | ICI signature genes B |
| NLRC3   | ICI signature genes A |
| NLRP12  | ICI signature genes B |
| NLRP3   | ICI signature genes A |
| NLRP7   | ICI signature genes B |
| NMRAL2P | ICI signature genes B |
| NNMT    | ICI signature genes A |
| NOX4    | ICI signature genes B |
| NPFFR1  | ICI signature genes B |
| NR0B1   | ICI signature genes B |
| NR4A3   | ICI signature genes A |
| NRIR    | ICI signature genes B |
| NT5E    | ICI signature genes B |
| NTM     | ICI signature genes A |
| NTNG1   | ICI signature genes B |
| NTRK3   | ICI signature genes B |
| NTS     | ICI signature genes B |
| NUGGC   | ICI signature genes A |
| ODAM    | ICI signature genes B |
| OGN     | ICI signature genes A |
| OLFML1  | ICI signature genes A |

|            |                       |
|------------|-----------------------|
| OLFML2B    | ICI signature genes A |
| OLFML3     | ICI signature genes A |
| OLR1       | ICI signature genes A |
| OMD        | ICI signature genes A |
| OR10AE1P   | ICI signature genes B |
| OR1E3      | ICI signature genes B |
| OR2C3      | ICI signature genes B |
| OR2I1P     | ICI signature genes A |
| OR4C14P    | ICI signature genes B |
| OR4K13     | ICI signature genes B |
| OR6C66P    | ICI signature genes B |
| OR7E22P    | ICI signature genes B |
| OR7E47P    | ICI signature genes B |
| ORM1       | ICI signature genes A |
| ORM2       | ICI signature genes A |
| OSCAR      | ICI signature genes A |
| OSGIN1     | ICI signature genes B |
| OSM        | ICI signature genes A |
| OTOP1      | ICI signature genes B |
| OTOP2      | ICI signature genes B |
| OTOP3      | ICI signature genes B |
| P2RX1      | ICI signature genes A |
| P2RX5      | ICI signature genes A |
| P2RX7      | ICI signature genes A |
| P2RY10     | ICI signature genes A |
| P2RY12     | ICI signature genes B |
| P2RY13     | ICI signature genes A |
| P2RY14     | ICI signature genes A |
| P2RY8      | ICI signature genes A |
| P4HA3      | ICI signature genes B |
| PABPC5     | ICI signature genes B |
| PADI2      | ICI signature genes A |
| PAEP       | ICI signature genes B |
| PAK3       | ICI signature genes B |
| PALM2AKAP2 | ICI signature genes B |
| PANX3      | ICI signature genes B |
| PAPPA      | ICI signature genes B |
| PARP15     | ICI signature genes A |
| PART1      | ICI signature genes B |
| PARVG      | ICI signature genes A |
| PATL2      | ICI signature genes B |
| PAX5       | ICI signature genes A |
| PCAT29     | ICI signature genes B |
| PCDHGA12   | ICI signature genes B |
| PCDHGA9    | ICI signature genes B |
| PCED1B-AS1 | ICI signature genes A |
| PCOLCE     | ICI signature genes A |
| PDCD1      | ICI signature genes A |
| PDCD1LG2   | ICI signature genes A |
| PDE1A      | ICI signature genes B |
| PDE4B      | ICI signature genes A |
| PDE6G      | ICI signature genes A |
| PDGFRA     | ICI signature genes A |
| PDGFRB     | ICI signature genes A |
| PDGFRL     | ICI signature genes A |
| PDK4       | ICI signature genes A |
| PDLIM3     | ICI signature genes A |
| PDPN       | ICI signature genes A |

|           |                       |
|-----------|-----------------------|
| PDZRN3    | ICI signature genes A |
| PDZRN4    | ICI signature genes B |
| PEAK3     | ICI signature genes B |
| PEBP4     | ICI signature genes A |
| PECAM1    | ICI signature genes A |
| PEG3      | ICI signature genes B |
| PGC       | ICI signature genes A |
| PGM5      | ICI signature genes B |
| PGR       | ICI signature genes B |
| PIANP     | ICI signature genes B |
| PIEZO2    | ICI signature genes B |
| PIGR      | ICI signature genes A |
| PIK3AP1   | ICI signature genes A |
| PIK3CG    | ICI signature genes A |
| PIK3R5    | ICI signature genes A |
| PIK3R6    | ICI signature genes A |
| PILRA     | ICI signature genes A |
| PIM2      | ICI signature genes A |
| PKD2L1    | ICI signature genes B |
| PKHD1L1   | ICI signature genes B |
| PLA1A     | ICI signature genes A |
| PLA2G12B  | ICI signature genes B |
| PLA2G1B   | ICI signature genes A |
| PLA2G2A   | ICI signature genes A |
| PLA2G2D   | ICI signature genes A |
| PLA2G5    | ICI signature genes B |
| PLA2G7    | ICI signature genes A |
| PLAAT4    | ICI signature genes A |
| PLAC8     | ICI signature genes A |
| PLCL2     | ICI signature genes A |
| PLCXD3    | ICI signature genes B |
| PLD4      | ICI signature genes B |
| PLEK      | ICI signature genes A |
| PLN       | ICI signature genes A |
| PLPP4     | ICI signature genes B |
| PLPP7     | ICI signature genes B |
| PLXNA4    | ICI signature genes B |
| PLXNC1    | ICI signature genes A |
| PMEPA1    | ICI signature genes A |
| PMP22     | ICI signature genes A |
| PNCK      | ICI signature genes B |
| PNMA2     | ICI signature genes B |
| PNMA3     | ICI signature genes B |
| PNMA8A    | ICI signature genes B |
| PNOC      | ICI signature genes A |
| PODN      | ICI signature genes A |
| PODNL1    | ICI signature genes A |
| POSTN     | ICI signature genes A |
| POU2F2    | ICI signature genes A |
| PPFIA2    | ICI signature genes B |
| PPIAP39   | ICI signature genes B |
| PPP1R16B  | ICI signature genes A |
| PPP1R1AP1 | ICI signature genes B |
| PPP1R9A   | ICI signature genes B |
| PQLC1P1   | ICI signature genes B |
| PRAC2     | ICI signature genes B |
| PRAME     | ICI signature genes B |
| PRAMEF13  | ICI signature genes B |



|           |                       |
|-----------|-----------------------|
| PRELP     | ICI signature genes A |
| PRF1      | ICI signature genes A |
| PRG4      | ICI signature genes B |
| PRKCB     | ICI signature genes A |
| PRND      | ICI signature genes B |
| PROKR2    | ICI signature genes B |
| PRRX1     | ICI signature genes A |
| PSMB9     | ICI signature genes A |
| PTAFR     | ICI signature genes A |
| PTCRA     | ICI signature genes B |
| PTF1A     | ICI signature genes B |
| PTGDR     | ICI signature genes B |
| PTGDS     | ICI signature genes A |
| PTGER2    | ICI signature genes A |
| PTGER3    | ICI signature genes B |
| PTGES3P2  | ICI signature genes B |
| PTGFR     | ICI signature genes B |
| PTGIS     | ICI signature genes A |
| PTHLH     | ICI signature genes B |
| PTPN22    | ICI signature genes A |
| PTPN7     | ICI signature genes A |
| PTPRC     | ICI signature genes A |
| PTPRN     | ICI signature genes B |
| PTX3      | ICI signature genes B |
| PXDN      | ICI signature genes B |
| PYHIN1    | ICI signature genes A |
| RAB37     | ICI signature genes A |
| RANBP3L   | ICI signature genes B |
| RARRES2   | ICI signature genes A |
| RARRES2P8 | ICI signature genes B |
| RASAL3    | ICI signature genes A |
| RASGRF1   | ICI signature genes B |
| RASGRF2   | ICI signature genes B |
| RASGRP4   | ICI signature genes B |
| RASSF2    | ICI signature genes A |
| RASSF4    | ICI signature genes A |
| RBMY1A1   | ICI signature genes B |
| RBMY3AP   | ICI signature genes B |
| RCAN2     | ICI signature genes A |
| RCN3      | ICI signature genes A |
| RCSD1     | ICI signature genes A |
| REM1      | ICI signature genes B |
| RETN      | ICI signature genes A |
| RFLNA     | ICI signature genes A |
| RFTN1     | ICI signature genes A |
| RGS1      | ICI signature genes A |
| RGS13     | ICI signature genes B |
| RGS18     | ICI signature genes A |
| RGS4      | ICI signature genes B |
| RHEX      | ICI signature genes B |
| RHOH      | ICI signature genes A |
| RIPOR2    | ICI signature genes A |
| RN7SKP229 | ICI signature genes B |
| RN7SKP231 | ICI signature genes B |
| RN7SKP48  | ICI signature genes B |
| RN7SL132P | ICI signature genes B |
| RN7SL617P | ICI signature genes B |
| RNA5-8SN3 | ICI signature genes B |

|               |                       |
|---------------|-----------------------|
| RNA5-8SP4     | ICI signature genes B |
| RNA5SP263     | ICI signature genes B |
| RNASE1        | ICI signature genes A |
| RNASE2        | ICI signature genes A |
| RNASE6        | ICI signature genes A |
| RNASE7        | ICI signature genes B |
| RNU1-34P      | ICI signature genes B |
| RNU4ATAC6P    | ICI signature genes B |
| RNU6-189P     | ICI signature genes B |
| RNU6-562P     | ICI signature genes B |
| RNU6-579P     | ICI signature genes B |
| ROR1          | ICI signature genes B |
| RORC          | ICI signature genes A |
| ROS1          | ICI signature genes A |
| RP1-309I22.2  | ICI signature genes B |
| RP11-345J18.2 | ICI signature genes B |
| RP11-366M4.11 | ICI signature genes B |
| RP11-367G6.3  | ICI signature genes B |
| RP11-401P9.4  | ICI signature genes B |
| RP11-445P19.3 | ICI signature genes B |
| RP11-556E13.1 | ICI signature genes B |
| RP11-652L8.4  | ICI signature genes B |
| RP11-706O15.3 | ICI signature genes B |
| RP3-492J12.2  | ICI signature genes B |
| RP4-669B10.3  | ICI signature genes B |
| RPL31P41      | ICI signature genes B |
| RSAD2         | ICI signature genes A |
| RSPO1         | ICI signature genes B |
| RSPO3         | ICI signature genes A |
| RTL3          | ICI signature genes B |
| RTN1          | ICI signature genes B |
| RTP5          | ICI signature genes B |
| RUBCNL        | ICI signature genes A |
| RUFY4         | ICI signature genes B |
| RUNX1T1       | ICI signature genes B |
| S100A2        | ICI signature genes B |
| S100B         | ICI signature genes A |
| S1PR1         | ICI signature genes A |
| S1PR4         | ICI signature genes A |
| SAA1          | ICI signature genes A |
| SAA2          | ICI signature genes A |
| SAA2-SAA4     | ICI signature genes A |
| SAGE1         | ICI signature genes B |
| SAMD3         | ICI signature genes B |
| SAMD9L        | ICI signature genes A |
| SAMSN1        | ICI signature genes A |
| SAPCD1        | ICI signature genes B |
| SASH3         | ICI signature genes A |
| SBSN          | ICI signature genes B |
| SCARA5        | ICI signature genes B |
| SCARF2        | ICI signature genes A |
| SCGB3A1       | ICI signature genes A |
| SCGB3A2       | ICI signature genes A |
| SCIMP         | ICI signature genes A |
| SCML4         | ICI signature genes B |
| SCN1A         | ICI signature genes B |
| SCN2B         | ICI signature genes B |
| SCN7A         | ICI signature genes A |

|           |                       |
|-----------|-----------------------|
| SCTR      | ICI signature genes A |
| SELE      | ICI signature genes A |
| SELL      | ICI signature genes A |
| SELP      | ICI signature genes A |
| SELPLG    | ICI signature genes A |
| SEMA3C    | ICI signature genes B |
| SEMA5A    | ICI signature genes B |
| SENCR     | ICI signature genes B |
| SEPTIN1   | ICI signature genes A |
| SERPINA1  | ICI signature genes A |
| SERPING1  | ICI signature genes A |
| SERTM2    | ICI signature genes B |
| SFRP2     | ICI signature genes A |
| SFRP4     | ICI signature genes A |
| SFTA2     | ICI signature genes A |
| SFTA3     | ICI signature genes A |
| SFTPA1    | ICI signature genes A |
| SFTPA2    | ICI signature genes A |
| SFTPA3P   | ICI signature genes B |
| SFTPB     | ICI signature genes A |
| SFTPC     | ICI signature genes A |
| SFTPD     | ICI signature genes A |
| SGCA      | ICI signature genes A |
| SGCD      | ICI signature genes B |
| SGIP1     | ICI signature genes B |
| SH2D1A    | ICI signature genes A |
| SH2D1B    | ICI signature genes B |
| SH2D5     | ICI signature genes B |
| SHANK1    | ICI signature genes B |
| SHISA2    | ICI signature genes B |
| SHISA9    | ICI signature genes B |
| SHISAL1   | ICI signature genes B |
| SIGLEC1   | ICI signature genes A |
| SIGLEC10  | ICI signature genes A |
| SIGLEC11  | ICI signature genes B |
| SIGLEC12  | ICI signature genes A |
| SIGLEC14  | ICI signature genes A |
| SIGLEC22P | ICI signature genes B |
| SIGLEC5   | ICI signature genes B |
| SIGLEC6   | ICI signature genes B |
| SIGLEC7   | ICI signature genes A |
| SIGLEC8   | ICI signature genes A |
| SIGLEC9   | ICI signature genes A |
| SIRPB1    | ICI signature genes A |
| SIRPB2    | ICI signature genes A |
| SIRPG     | ICI signature genes A |
| SIRPG-AS1 | ICI signature genes B |
| SIT1      | ICI signature genes A |
| SKAP1     | ICI signature genes A |
| SLA       | ICI signature genes A |
| SLA2      | ICI signature genes A |
| SLAMF1    | ICI signature genes A |
| SLAMF6    | ICI signature genes A |
| SLAMF7    | ICI signature genes A |
| SLAMF8    | ICI signature genes A |
| SLC10A6   | ICI signature genes B |
| SLC12A3   | ICI signature genes B |
| SLC13A5   | ICI signature genes B |

|             |                       |
|-------------|-----------------------|
| SLC15A3     | ICI signature genes A |
| SLC16A4     | ICI signature genes A |
| SLC18A3     | ICI signature genes B |
| SLC1A7      | ICI signature genes B |
| SLC22A3     | ICI signature genes A |
| SLC22A31    | ICI signature genes A |
| SLC24A2     | ICI signature genes B |
| SLC26A4-AS1 | ICI signature genes B |
| SLC34A2     | ICI signature genes A |
| SLC46A2     | ICI signature genes B |
| SLC47A2     | ICI signature genes B |
| SLC5A9      | ICI signature genes B |
| SLC6A2      | ICI signature genes B |
| SLC7A10     | ICI signature genes B |
| SLC7A7      | ICI signature genes A |
| SLCO2A1     | ICI signature genes A |
| SLCO2B1     | ICI signature genes A |
| SLCO5A1     | ICI signature genes B |
| SLFN12L     | ICI signature genes B |
| SLIT3       | ICI signature genes A |
| SMARCE1P7   | ICI signature genes B |
| SMIM25      | ICI signature genes A |
| SNED1       | ICI signature genes A |
| SNX20       | ICI signature genes A |
| SOCAR       | ICI signature genes B |
| SOD3        | ICI signature genes A |
| SORCS2      | ICI signature genes B |
| SOX11       | ICI signature genes B |
| SOX2        | ICI signature genes B |
| SOX2-OT     | ICI signature genes B |
| SOX21       | ICI signature genes B |
| SP140       | ICI signature genes A |
| SPAG6       | ICI signature genes A |
| SPANXA1     | ICI signature genes B |
| SPARC       | ICI signature genes A |
| SPATA20P1   | ICI signature genes A |
| SPATA31C1   | ICI signature genes B |
| SPATA8-AS1  | ICI signature genes B |
| SPI1        | ICI signature genes A |
| SPIB        | ICI signature genes A |
| SPN         | ICI signature genes A |
| SPNS3       | ICI signature genes B |
| SPOCK1      | ICI signature genes B |
| SPOCK2      | ICI signature genes A |
| SPON1       | ICI signature genes A |
| SPON2       | ICI signature genes A |
| SRGN        | ICI signature genes A |
| SSC5D       | ICI signature genes A |
| SSPN        | ICI signature genes A |
| SST         | ICI signature genes B |
| SSTR1       | ICI signature genes B |
| SSTR2       | ICI signature genes B |
| SSTR3       | ICI signature genes B |
| SSU72P3     | ICI signature genes B |
| ST6GALNAC5  | ICI signature genes A |
| ST8SIA2     | ICI signature genes B |
| STAB1       | ICI signature genes A |
| STAP1       | ICI signature genes A |

|              |                       |
|--------------|-----------------------|
| STARD13      | ICI signature genes A |
| STARD8       | ICI signature genes A |
| STAT4        | ICI signature genes A |
| STXBP5L      | ICI signature genes B |
| SUCNR1       | ICI signature genes A |
| SUGCT        | ICI signature genes B |
| SULF1        | ICI signature genes A |
| SULT1C2      | ICI signature genes B |
| SUSD3        | ICI signature genes A |
| SUSD5        | ICI signature genes B |
| SYNDIG1      | ICI signature genes B |
| SYNE1        | ICI signature genes A |
| SYNPO2       | ICI signature genes A |
| SYT15        | ICI signature genes B |
| TAFA5        | ICI signature genes B |
| TAGAP        | ICI signature genes A |
| TAGLN        | ICI signature genes A |
| TBC1D10C     | ICI signature genes A |
| TBC1D27P     | ICI signature genes B |
| TBX21        | ICI signature genes A |
| TBX5-AS1     | ICI signature genes B |
| TBXAS1       | ICI signature genes A |
| TCF21        | ICI signature genes A |
| TCL1A        | ICI signature genes A |
| TDRD6        | ICI signature genes B |
| TENM2        | ICI signature genes B |
| TENM3        | ICI signature genes B |
| TENM3-AS1    | ICI signature genes B |
| TENT5C       | ICI signature genes A |
| TESPA1       | ICI signature genes A |
| TFAP2D       | ICI signature genes B |
| TFEC         | ICI signature genes A |
| TGFB3        | ICI signature genes A |
| TGFBI        | ICI signature genes A |
| TGM2         | ICI signature genes A |
| THBS1        | ICI signature genes A |
| THBS2        | ICI signature genes A |
| THEMIS       | ICI signature genes B |
| THEMIS2      | ICI signature genes A |
| THY1         | ICI signature genes A |
| TIFAB        | ICI signature genes B |
| TIGIT        | ICI signature genes A |
| TIMD4        | ICI signature genes A |
| TIMP2        | ICI signature genes A |
| TIMP3        | ICI signature genes A |
| TLR10        | ICI signature genes A |
| TLR4         | ICI signature genes A |
| TLR7         | ICI signature genes A |
| TLR8         | ICI signature genes A |
| TLX2         | ICI signature genes B |
| TM6SF1       | ICI signature genes A |
| TMEM100      | ICI signature genes A |
| TMEM119      | ICI signature genes A |
| TMEM130      | ICI signature genes A |
| TMEM132D     | ICI signature genes B |
| TMEM132D-AS1 | ICI signature genes B |
| TMEM150B     | ICI signature genes A |
| TMEM156      | ICI signature genes A |

|           |                       |
|-----------|-----------------------|
| TMEM158   | ICI signature genes B |
| TMEM163   | ICI signature genes B |
| TMEM176A  | ICI signature genes A |
| TMEM176B  | ICI signature genes A |
| TMEM200A  | ICI signature genes A |
| TMEM212   | ICI signature genes B |
| TMEM229B  | ICI signature genes B |
| TMEM236   | ICI signature genes B |
| TMEM271   | ICI signature genes B |
| TMEM273   | ICI signature genes A |
| TMEM52B   | ICI signature genes B |
| TMIGD2    | ICI signature genes B |
| TMIGD3    | ICI signature genes A |
| TMPRSS11D | ICI signature genes B |
| TMPRSS2   | ICI signature genes A |
| TNC       | ICI signature genes B |
| TNFAIP6   | ICI signature genes A |
| TNFAIP8L2 | ICI signature genes A |
| TNFRSF13B | ICI signature genes A |
| TNFRSF17  | ICI signature genes A |
| TNFRSF1B  | ICI signature genes A |
| TNFRSF8   | ICI signature genes B |
| TNFRSF9   | ICI signature genes A |
| TNFSF11   | ICI signature genes B |
| TNFSF13B  | ICI signature genes A |
| TNFSF14   | ICI signature genes B |
| TNFSF4    | ICI signature genes A |
| TNFSF8    | ICI signature genes A |
| TNIP3     | ICI signature genes A |
| TNN       | ICI signature genes B |
| TNNC1     | ICI signature genes A |
| TNR       | ICI signature genes B |
| TNR-IT1   | ICI signature genes B |
| TNS3      | ICI signature genes A |
| TOMM20P2  | ICI signature genes B |
| TPTE      | ICI signature genes B |
| TRAC      | ICI signature genes A |
| TRAF3IP3  | ICI signature genes A |
| TRAT1     | ICI signature genes A |
| TRAV1-2   | ICI signature genes B |
| TRAV10    | ICI signature genes B |
| TRAV12-1  | ICI signature genes A |
| TRAV12-2  | ICI signature genes A |
| TRAV12-3  | ICI signature genes A |
| TRAV13-1  | ICI signature genes A |
| TRAV13-2  | ICI signature genes B |
| TRAV14DV4 | ICI signature genes B |
| TRAV16    | ICI signature genes B |
| TRAV17    | ICI signature genes B |
| TRAV19    | ICI signature genes A |
| TRAV2     | ICI signature genes A |
| TRAV20    | ICI signature genes B |
| TRAV21    | ICI signature genes A |
| TRAV22    | ICI signature genes B |
| TRAV23DV6 | ICI signature genes B |
| TRAV24    | ICI signature genes B |
| TRAV25    | ICI signature genes B |
| TRAV26-1  | ICI signature genes B |

|           |                       |
|-----------|-----------------------|
| TRAV26-2  | ICI signature genes B |
| TRAV27    | ICI signature genes B |
| TRAV29DV5 | ICI signature genes B |
| TRAV3     | ICI signature genes B |
| TRAV35    | ICI signature genes B |
| TRAV36DV7 | ICI signature genes B |
| TRAV39    | ICI signature genes B |
| TRAV4     | ICI signature genes A |
| TRAV41    | ICI signature genes B |
| TRAV5     | ICI signature genes B |
| TRAV6     | ICI signature genes B |
| TRAV8-1   | ICI signature genes B |
| TRAV8-2   | ICI signature genes B |
| TRAV8-3   | ICI signature genes A |
| TRAV8-4   | ICI signature genes B |
| TRAV8-6   | ICI signature genes A |
| TRAV9-2   | ICI signature genes A |
| TRBC1     | ICI signature genes A |
| TRBC2     | ICI signature genes A |
| TRBJ2-7   | ICI signature genes A |
| TRBV10-3  | ICI signature genes A |
| TRBV11-2  | ICI signature genes A |
| TRBV12-3  | ICI signature genes B |
| TRBV12-4  | ICI signature genes A |
| TRBV13    | ICI signature genes B |
| TRBV14    | ICI signature genes B |
| TRBV15    | ICI signature genes B |
| TRBV18    | ICI signature genes A |
| TRBV19    | ICI signature genes A |
| TRBV2     | ICI signature genes A |
| TRBV20-1  | ICI signature genes A |
| TRBV23-1  | ICI signature genes B |
| TRBV24-1  | ICI signature genes B |
| TRBV27    | ICI signature genes B |
| TRBV28    | ICI signature genes A |
| TRBV29-1  | ICI signature genes A |
| TRBV3-1   | ICI signature genes A |
| TRBV30    | ICI signature genes A |
| TRBV4-1   | ICI signature genes A |
| TRBV4-2   | ICI signature genes A |
| TRBV5-1   | ICI signature genes A |
| TRBV5-4   | ICI signature genes A |
| TRBV5-6   | ICI signature genes A |
| TRBV6-1   | ICI signature genes A |
| TRBV6-5   | ICI signature genes A |
| TRBV6-6   | ICI signature genes A |
| TRBV7-3   | ICI signature genes B |
| TRBV7-4   | ICI signature genes B |
| TRBV7-6   | ICI signature genes B |
| TRBV7-9   | ICI signature genes A |
| TRBV9     | ICI signature genes A |
| TRDC      | ICI signature genes A |
| TRDV1     | ICI signature genes B |
| TREM1     | ICI signature genes A |
| TREM2     | ICI signature genes A |
| TREML1    | ICI signature genes B |
| TRG-AS1   | ICI signature genes B |
| TRGC1     | ICI signature genes B |

|           |                       |
|-----------|-----------------------|
| TRGC2     | ICI signature genes A |
| TRGV10    | ICI signature genes A |
| TRGV3     | ICI signature genes B |
| TRGV4     | ICI signature genes B |
| TRGV5     | ICI signature genes B |
| TRGV7     | ICI signature genes B |
| TRIM55    | ICI signature genes B |
| TRIM61    | ICI signature genes B |
| TRIML2    | ICI signature genes B |
| TRPC7-AS2 | ICI signature genes B |
| TRPV2     | ICI signature genes A |
| TSHR      | ICI signature genes B |
| TSHZ3     | ICI signature genes B |
| TSPAN11   | ICI signature genes A |
| TSPAN2    | ICI signature genes A |
| TSPAN32   | ICI signature genes B |
| TSPAN4    | ICI signature genes A |
| TSPY2     | ICI signature genes B |
| TTC24     | ICI signature genes B |
| TUSC7     | ICI signature genes B |
| TVP23A    | ICI signature genes B |
| TWIST1    | ICI signature genes B |
| TXK       | ICI signature genes B |
| TYROBP    | ICI signature genes A |
| UBASH3A   | ICI signature genes A |
| UBD       | ICI signature genes A |
| UBE2QL1   | ICI signature genes B |
| UGT1A6    | ICI signature genes B |
| UGT1A7    | ICI signature genes B |
| UNC5A     | ICI signature genes B |
| UNC5C     | ICI signature genes B |
| USH1G     | ICI signature genes B |
| USP30-AS1 | ICI signature genes A |
| VCAM1     | ICI signature genes A |
| VCAN      | ICI signature genes A |
| VEGFD     | ICI signature genes A |
| VENTX     | ICI signature genes B |
| VENTXP5   | ICI signature genes B |
| VGLL3     | ICI signature genes A |
| VIM       | ICI signature genes A |
| VNN1      | ICI signature genes A |
| VNN2      | ICI signature genes A |
| VSIG4     | ICI signature genes A |
| VSTM1     | ICI signature genes B |
| VSTM2L    | ICI signature genes A |
| VSTM4     | ICI signature genes A |
| WAS       | ICI signature genes A |
| WDFY4     | ICI signature genes A |
| WFDC5     | ICI signature genes B |
| WIPF1     | ICI signature genes A |
| WNT2      | ICI signature genes A |
| XAGE2     | ICI signature genes B |
| XCL2      | ICI signature genes A |
| XCR1      | ICI signature genes B |
| XIRP1     | ICI signature genes B |
| XIST      | ICI signature genes A |
| XKR4      | ICI signature genes B |
| XKR7      | ICI signature genes B |



|            |                       |
|------------|-----------------------|
| XPNPEP2    | ICI signature genes B |
| XXYLT1-AS2 | ICI signature genes B |
| Z95114.3   | ICI signature genes B |
| ZAP70      | ICI signature genes A |
| ZBP1       | ICI signature genes A |
| ZBTB16     | ICI signature genes B |
| ZC3H12D    | ICI signature genes A |
| ZEB2       | ICI signature genes A |
| ZEB2-AS1   | ICI signature genes B |
| ZFHX4      | ICI signature genes B |
| ZFP57      | ICI signature genes B |
| ZIC3       | ICI signature genes B |
| ZNF366     | ICI signature genes B |
| ZNF385D    | ICI signature genes B |
| ZNF423     | ICI signature genes B |
| ZNF469     | ICI signature genes B |
| ZNF521     | ICI signature genes A |
| ZNF683     | ICI signature genes A |
| ZNF734P    | ICI signature genes B |
| ZNF80      | ICI signature genes B |
| ZNF804A    | ICI signature genes B |
| ZNF831     | ICI signature genes B |
| ZPLD1      | ICI signature genes B |
| ZYG11A     | ICI signature genes B |

**Table-S6-ICI score for each individual**

| Tag          | ICI score    | ICI score group according to X-tile |
|--------------|--------------|-------------------------------------|
| TCGA-34-5234 | 1.544043521  | High                                |
| TCGA-96-7544 | -0.931571569 | Low                                 |
| TCGA-85-A513 | -1.137877033 | Low                                 |
| TCGA-85-8584 | 1.316153426  | High                                |
| TCGA-85-A511 | -0.079421555 | High                                |
| TCGA-66-2789 | 0.485929559  | High                                |
| TCGA-22-0940 | 0.484505843  | High                                |
| TCGA-96-A4JL | 1.627464558  | High                                |
| TCGA-77-8136 | -0.464589508 | High                                |
| TCGA-63-5131 | 0.851938446  | High                                |
| TCGA-90-7964 | -0.051154649 | High                                |
| TCGA-85-A5B5 | 0.04297421   | High                                |
| TCGA-37-3789 | 0.465675467  | High                                |
| TCGA-O2-A5IB | 1.647481702  | High                                |
| TCGA-58-8390 | 0.742565671  | High                                |
| TCGA-66-2777 | -0.819016086 | Low                                 |
| TCGA-77-8140 | 0.330324299  | High                                |
| TCGA-98-A538 | -0.723476552 | High                                |
| TCGA-66-2785 | -0.161925757 | High                                |
| TCGA-43-5670 | 0.545836861  | High                                |
| TCGA-22-5472 | 0.355308529  | High                                |
| TCGA-60-2704 | -1.581584553 | Low                                 |
| TCGA-77-6843 | 0.247138069  | High                                |
| TCGA-63-A5MG | -2.181351953 | Low                                 |
| TCGA-66-2734 | -0.331864926 | High                                |
| TCGA-43-2581 | -2.217745057 | Low                                 |
| TCGA-52-7811 | -0.446056682 | High                                |
| TCGA-85-8287 | -1.835688604 | Low                                 |
| TCGA-85-8355 | 0.993076602  | High                                |
| TCGA-94-7033 | 0.602852833  | High                                |
| TCGA-60-2697 | -0.715056912 | High                                |
| TCGA-77-8145 | 0.010006072  | High                                |
| TCGA-85-7844 | 0.039917284  | High                                |
| TCGA-39-5040 | 1.952090452  | High                                |
| TCGA-66-2795 | -0.852783926 | Low                                 |
| TCGA-33-4586 | -0.423311789 | High                                |
| TCGA-NC-A5HH | 1.395530474  | High                                |
| TCGA-22-1002 | 1.393429497  | High                                |
| TCGA-60-2695 | 0.631130868  | High                                |
| TCGA-77-A5G8 | -0.641667067 | High                                |
| TCGA-63-A5MP | -0.163034333 | High                                |
| TCGA-22-0944 | -0.171721731 | High                                |
| TCGA-21-1081 | 0.181061104  | High                                |
| TCGA-O2-A52V | -0.156287712 | High                                |
| TCGA-33-AASB | 0.800106986  | High                                |
| TCGA-63-5128 | -0.476911396 | High                                |
| TCGA-96-8170 | 0.345447462  | High                                |
| TCGA-63-A5MW | 2.865572858  | High                                |
| TCGA-37-3792 | -0.575116741 | High                                |
| TCGA-56-A4BX | -0.643615875 | High                                |
| TCGA-56-8083 | 3.774137741  | High                                |
| TCGA-98-A53H | 2.84831054   | High                                |
| TCGA-94-A4VJ | 0.395689758  | High                                |
| TCGA-43-7658 | 2.494275908  | High                                |
| TCGA-NC-A5HN | -0.749283297 | High                                |
| TCGA-63-7021 | -1.108660243 | Low                                 |

|              |                   |
|--------------|-------------------|
| TCGA-22-5471 | 0.51191592 High   |
| TCGA-77-8133 | 0.412573179 High  |
| TCGA-37-A5EM | 0.488107881 High  |
| TCGA-85-8071 | 0.893727947 High  |
| TCGA-NC-A5HP | 0.811178257 High  |
| TCGA-85-A4PA | 4.534305926 High  |
| TCGA-33-4582 | 0.279693695 High  |
| TCGA-43-2578 | 0.264936655 High  |
| TCGA-34-A5IX | 0.517666704 High  |
| TCGA-56-8504 | -0.061708362 High |
| TCGA-18-5595 | -0.001255899 High |
| TCGA-21-5784 | -1.001546002 Low  |
| TCGA-90-A4ED | -0.604666084 High |
| TCGA-MF-A522 | -0.295620001 High |
| TCGA-46-3768 | -0.616179367 High |
| TCGA-77-7335 | -1.569075169 Low  |
| TCGA-56-A4BY | 0.512212898 High  |
| TCGA-85-8070 | -0.526043795 High |
| TCGA-56-7579 | -0.54224447 High  |
| TCGA-NC-A5HG | 0.184387639 High  |
| TCGA-56-8305 | -0.951684134 Low  |
| TCGA-60-2703 | 0.320327172 High  |
| TCGA-39-5036 | -0.50071705 High  |
| TCGA-33-6737 | 0.200446804 High  |
| TCGA-34-2608 | -1.758950121 Low  |
| TCGA-39-5024 | 0.357406058 High  |
| TCGA-77-7142 | 0.80456417 High   |
| TCGA-85-8350 | 1.121818482 High  |
| TCGA-O2-A52Q | -0.205737 High    |
| TCGA-68-8250 | -0.202623224 High |
| TCGA-70-6723 | 0.198139195 High  |
| TCGA-68-8251 | 1.051746634 High  |
| TCGA-85-7697 | -0.271425114 High |
| TCGA-66-2756 | 1.456382858 High  |
| TCGA-85-6561 | -3.133967867 Low  |
| TCGA-94-7943 | 0.88289153 High   |
| TCGA-22-1011 | -3.449207954 Low  |
| TCGA-85-8664 | 0.69447279 High   |
| TCGA-63-A5MH | 1.547103905 High  |
| TCGA-94-8490 | -0.345915775 High |
| TCGA-85-8481 | -0.28016173 High  |
| TCGA-60-2716 | 0.534584735 High  |
| TCGA-O2-A52S | -0.423819252 High |
| TCGA-51-4080 | -0.223563203 High |
| TCGA-22-5485 | -0.87820596 Low   |
| TCGA-85-6175 | -0.313420182 High |
| TCGA-85-8276 | -2.208041711 Low  |
| TCGA-77-8008 | -1.180111757 Low  |
| TCGA-39-5028 | -0.870954656 Low  |
| TCGA-34-5928 | -1.49E-01 High    |
| TCGA-43-6773 | -7.06142189 Low   |
| TCGA-63-A5MI | 0.599783792 High  |
| TCGA-63-A5ML | 0.202789688 High  |
| TCGA-39-5030 | -4.451494771 Low  |
| TCGA-51-4079 | -1.707616381 Low  |
| TCGA-22-5491 | -0.057444171 High |
| TCGA-66-2744 | -0.953021985 Low  |
| TCGA-33-4547 | 0.069553625 High  |

|              |                   |
|--------------|-------------------|
| TCGA-52-7810 | 0.165922 High     |
| TCGA-77-7139 | -0.743925967 High |
| TCGA-66-2800 | -1.142194708 Low  |
| TCGA-33-4566 | -0.756860254 High |
| TCGA-90-7766 | -1.200490539 Low  |
| TCGA-60-2707 | -0.465204079 High |
| TCGA-56-8628 | 0.893008271 High  |
| TCGA-85-8666 | -0.453727622 High |
| TCGA-60-2721 | 0.508355134 High  |
| TCGA-22-4596 | 0.444849644 High  |
| TCGA-33-A5GW | -0.04477713 High  |
| TCGA-60-2715 | 2.095849313 High  |
| TCGA-85-8351 | 0.591025805 High  |
| TCGA-58-A46M | -0.363012296 High |
| TCGA-37-4129 | 5.225163183 High  |
| TCGA-21-1075 | -0.478891042 High |
| TCGA-43-7656 | 0.711014153 High  |
| TCGA-58-8388 | 2.22083007 High   |
| TCGA-98-A53J | 0.095098362 High  |
| TCGA-85-7696 | 0.584426133 High  |
| TCGA-34-5231 | 0.293434624 High  |
| TCGA-34-5929 | 0.253729223 High  |
| TCGA-22-5492 | -0.896474997 Low  |
| TCGA-98-A53C | 3.820896174 High  |
| TCGA-94-8491 | 0.691662813 High  |
| TCGA-90-7767 | 1.348767852 High  |
| TCGA-96-8169 | -0.560880405 High |
| TCGA-34-2596 | 0.168756683 High  |
| TCGA-56-A62T | -0.123939082 High |
| TCGA-21-1071 | 0.146001229 High  |
| TCGA-22-5480 | 1.071792622 High  |
| TCGA-77-A5GH | 0.49124625 High   |
| TCGA-L3-A4E7 | 0.544159457 High  |
| TCGA-60-2723 | -1.373418694 Low  |
| TCGA-37-3783 | 0.844180038 High  |
| TCGA-66-2763 | -0.206367254 High |
| TCGA-63-6202 | -0.630445055 High |
| TCGA-L3-A524 | -0.322239698 High |
| TCGA-98-8021 | 0.413482162 High  |
| TCGA-77-A5GF | -0.80902599 Low   |
| TCGA-66-2787 | -0.243183868 High |
| TCGA-77-8138 | -0.466481713 High |
| TCGA-63-A5MR | 0.035700693 High  |
| TCGA-66-2768 | 0.336268293 High  |
| TCGA-77-8146 | -0.185015007 High |
| TCGA-43-A56V | -0.098230377 High |
| TCGA-22-1005 | -5.014943001 Low  |
| TCGA-66-2780 | -0.595776118 High |
| TCGA-77-8156 | -0.87673882 Low   |
| TCGA-66-2790 | 1.393602552 High  |
| TCGA-98-8022 | -0.163579362 High |
| TCGA-58-A46L | 1.791685064 High  |
| TCGA-O2-A52N | 0.985934528 High  |
| TCGA-63-7022 | -5.056243744 Low  |
| TCGA-37-4135 | 1.459361088 High  |
| TCGA-66-2727 | -0.572792075 High |
| TCGA-34-7107 | -1.358513964 Low  |
| TCGA-NC-A5HD | 0.121475511 High  |

|              |                   |
|--------------|-------------------|
| TCGA-56-7582 | -0.200658779 High |
| TCGA-18-3415 | -0.633425372 High |
| TCGA-56-7580 | 0.075171022 High  |
| TCGA-33-AASL | 0.580161353 High  |
| TCGA-43-2576 | -1.463899566 Low  |
| TCGA-77-A5FZ | -1.15326389 Low   |
| TCGA-33-4583 | -0.012858756 High |
| TCGA-46-6026 | 0.655403452 High  |
| TCGA-18-3414 | 0.773716296 High  |
| TCGA-63-A5MY | -0.023822898 High |
| TCGA-56-8082 | 0.380418869 High  |
| TCGA-60-2712 | -3.28913149 Low   |
| TCGA-60-2698 | -0.005514435 High |
| TCGA-52-7809 | 1.659015977 High  |
| TCGA-34-5232 | 0.473845503 High  |
| TCGA-18-4083 | -0.35878798 High  |
| TCGA-37-A5EN | 0.178765968 High  |
| TCGA-85-A510 | 3.004454876 High  |
| TCGA-60-2720 | -0.751712899 High |
| TCGA-60-2710 | -0.63860232 High  |
| TCGA-94-8035 | -0.061248869 High |
| TCGA-22-4593 | 0.384324747 High  |
| TCGA-18-3419 | -0.526773938 High |
| TCGA-66-2793 | 0.9474929 High    |
| TCGA-21-1079 | 0.366398699 High  |
| TCGA-92-8064 | -1.17486966 Low   |
| TCGA-63-7023 | 0.383348702 High  |
| TCGA-60-2706 | -0.071895742 High |
| TCGA-98-7454 | -0.781164834 High |
| TCGA-37-4141 | 2.49E+00 High     |
| TCGA-22-5477 | -0.168502593 High |
| TCGA-33-4533 | 2.904224877 High  |
| TCGA-77-8128 | -0.507964396 High |
| TCGA-56-8309 | -0.123888482 High |
| TCGA-56-A5DR | 0.30198539 High   |
| TCGA-37-4130 | 4.275100832 High  |
| TCGA-58-A46J | 0.320161014 High  |
| TCGA-43-6143 | 0.528383627 High  |
| TCGA-77-A5G6 | 0.353002839 High  |
| TCGA-39-5031 | -0.76817175 High  |
| TCGA-90-A59Q | 0.296029593 High  |
| TCGA-68-7755 | -0.556668553 High |
| TCGA-66-2767 | 0.521349127 High  |
| TCGA-66-2771 | -0.108819361 High |
| TCGA-85-6560 | 0.117177862 High  |
| TCGA-56-8304 | -0.686302219 High |
| TCGA-56-7221 | 0.948729169 High  |
| TCGA-18-3421 | 0.643462466 High  |
| TCGA-51-6867 | 0.349975925 High  |
| TCGA-NC-A5HL | 0.986366675 High  |
| TCGA-77-A5G1 | 0.188469689 High  |
| TCGA-96-7545 | 0.112013158 High  |
| TCGA-NC-A5HM | 0.47548564 High   |
| TCGA-33-4589 | -0.849673082 Low  |
| TCGA-85-A4QR | 0.033057402 High  |
| TCGA-60-2711 | -0.436530412 High |
| TCGA-33-4532 | -0.234280262 High |
| TCGA-NC-A5HJ | 3.228184979 High  |

|              |              |      |
|--------------|--------------|------|
| TCGA-21-5787 | -0.081358498 | High |
| TCGA-85-8479 | 0.430249148  | High |
| TCGA-34-5240 | -0.30121038  | High |
| TCGA-77-8148 | -0.808205893 | Low  |
| TCGA-56-8626 | 1.418324291  | High |
| TCGA-33-A4WN | -0.690361633 | High |
| TCGA-39-5027 | -0.071101713 | High |
| TCGA-56-8503 | -0.556750313 | High |
| TCGA-56-8623 | 1.27485852   | High |
| TCGA-77-6845 | -0.159446964 | High |
| TCGA-85-A50Z | 0.83906381   | High |
| TCGA-77-8144 | 0.152044212  | High |
| TCGA-85-A53L | 0.350370087  | High |
| TCGA-XC-AA0X | -0.03547021  | High |
| TCGA-66-2782 | 0.499395281  | High |
| TCGA-68-A59I | 0.721002747  | High |
| TCGA-77-A5G7 | 0.915970897  | High |
| TCGA-90-A4EE | 2.123028655  | High |
| TCGA-98-8023 | 0.163933194  | High |
| TCGA-34-8456 | -0.020229148 | High |
| TCGA-56-5897 | -2.373501108 | Low  |
| TCGA-66-2786 | 0.24772739   | High |
| TCGA-39-5037 | -0.377300872 | High |
| TCGA-56-6545 | -0.981304176 | Low  |
| TCGA-NK-A5CT | 1.452318915  | High |
| TCGA-22-1016 | 1.416221816  | High |
| TCGA-39-5016 | -0.04274036  | High |
| TCGA-63-A5MM | 0.243906619  | High |
| TCGA-33-4538 | -0.285251767 | High |
| TCGA-63-A5MT | 0.402812476  | High |
| TCGA-18-3416 | 1.320989671  | High |
| TCGA-66-2753 | -0.425227048 | High |
| TCGA-63-7020 | 0.383644313  | High |
| TCGA-56-8308 | -1.266085894 | Low  |
| TCGA-18-3408 | -0.488964107 | High |
| TCGA-NK-A5D1 | 1.660433826  | High |
| TCGA-85-6798 | -0.501471604 | High |
| TCGA-22-4599 | -1.632363124 | Low  |
| TCGA-56-A4ZK | -0.489884652 | High |
| TCGA-56-7731 | -1.483434914 | Low  |
| TCGA-92-7341 | -0.821997993 | Low  |
| TCGA-85-8353 | -1.555988253 | Low  |
| TCGA-85-A4QQ | 0.537810933  | High |
| TCGA-77-6842 | 0.436144916  | High |
| TCGA-22-4595 | -0.577176185 | High |
| TCGA-33-4587 | 1.630998547  | High |
| TCGA-56-A4BW | 1.287954387  | High |
| TCGA-21-1076 | 0.118648696  | High |
| TCGA-6A-AB49 | 0.798429364  | High |
| TCGA-63-A5M9 | 0.407437845  | High |
| TCGA-39-5022 | -3.319823689 | Low  |
| TCGA-43-6771 | -0.336222453 | High |
| TCGA-98-8020 | -0.354109889 | High |
| TCGA-77-7141 | 0.179120728  | High |
| TCGA-92-7340 | -0.252878417 | High |
| TCGA-56-8622 | -0.91696446  | Low  |
| TCGA-70-6722 | -0.853544923 | Low  |
| TCGA-43-A56U | -3.719582018 | Low  |

|              |                   |
|--------------|-------------------|
| TCGA-66-2770 | -0.339617018 High |
| TCGA-85-7710 | 0.721724158 High  |
| TCGA-58-8387 | -1.950737269 Low  |
| TCGA-85-8352 | 1.305181047 High  |
| TCGA-21-5786 | -0.938294924 Low  |
| TCGA-33-AASI | 0.007573276 High  |
| TCGA-56-8625 | 0.338789309 High  |
| TCGA-34-2600 | 0.458948446 High  |
| TCGA-60-2726 | 1.695953383 High  |
| TCGA-77-8153 | -0.510025035 High |
| TCGA-66-2791 | -0.76825371 High  |
| TCGA-68-7756 | -0.557360047 High |
| TCGA-94-7557 | 0.02344664 High   |
| TCGA-56-A5DS | 0.787422884 High  |
| TCGA-22-4613 | -1.448145772 Low  |
| TCGA-77-8130 | -0.003300349 High |
| TCGA-21-1080 | 0.180126591 High  |
| TCGA-98-A53I | -0.084829753 High |
| TCGA-34-5236 | -1.075191853 Low  |
| TCGA-21-5782 | 22.50137288 High  |
| TCGA-60-2708 | 0.199110609 High  |
| TCGA-96-A4JK | -0.801537105 Low  |
| TCGA-66-2788 | -1.513627096 Low  |
| TCGA-56-8624 | 1.43423636 High   |
| TCGA-22-5473 | -0.54090439 High  |
| TCGA-21-A5DI | 0.682453109 High  |
| TCGA-85-8049 | -1.947190998 Low  |
| TCGA-21-5783 | 0.955757743 High  |
| TCGA-46-3765 | -1.52604189 Low   |
| TCGA-39-5021 | -1.311001617 Low  |
| TCGA-90-6837 | -1.020501676 Low  |
| TCGA-39-5011 | -0.765711153 High |
| TCGA-39-5019 | -0.318277333 High |
| TCGA-98-A539 | -0.102826076 High |
| TCGA-66-2781 | -0.883638644 Low  |
| TCGA-37-5819 | 0.214424932 High  |
| TCGA-56-8201 | -1.613089284 Low  |
| TCGA-63-A5MB | 0.607594919 High  |
| TCGA-60-2722 | -0.168766658 High |
| TCGA-85-8048 | 0.705180142 High  |
| TCGA-56-7223 | 1.346806433 High  |
| TCGA-43-8115 | -0.092588521 High |
| TCGA-18-5592 | -0.687188012 High |
| TCGA-77-7337 | -0.189118698 High |
| TCGA-60-2719 | 0.022622379 High  |
| TCGA-22-5478 | 0.161478782 High  |
| TCGA-66-2757 | 0.368397961 High  |
| TCGA-18-3406 | -0.391748172 High |
| TCGA-77-A5GB | -0.616676328 High |
| TCGA-21-1070 | -0.195247208 High |
| TCGA-43-A475 | 2.118772727 High  |
| TCGA-85-7698 | -0.131589659 High |
| TCGA-85-7843 | -0.890239798 Low  |
| TCGA-NC-A5HT | 0.234071859 High  |
| TCGA-58-8393 | 1.086888444 High  |
| TCGA-66-2737 | -0.041789906 High |
| TCGA-LA-A7SW | 1.10944217 High   |
| TCGA-77-8007 | -0.252172921 High |

|              |                   |
|--------------|-------------------|
| TCGA-85-8354 | -0.325128237 High |
| TCGA-22-5474 | -2.08724215 Low   |
| TCGA-77-7140 | -0.258660807 High |
| TCGA-22-4601 | 0.017606444 High  |
| TCGA-66-2794 | -0.299388587 High |
| TCGA-22-1017 | 0.631580381 High  |
| TCGA-77-A5GA | -0.127556959 High |
| TCGA-56-7222 | 0.30311196 High   |
| TCGA-85-7699 | -0.690546996 High |
| TCGA-66-2758 | -0.697650645 High |
| TCGA-85-7950 | 3.385592778 High  |
| TCGA-39-5034 | -0.751543727 High |
| TCGA-85-8052 | -0.645718199 High |
| TCGA-43-3394 | 0.066608602 High  |
| TCGA-NK-A5CX | -0.250560304 High |
| TCGA-39-5035 | -0.922359429 Low  |
| TCGA-43-6647 | -0.570319214 High |
| TCGA-18-4086 | -1.58882369 Low   |
| TCGA-NC-A5HF | 0.299596367 High  |
| TCGA-39-5029 | -0.860416419 Low  |
| TCGA-43-5668 | -0.591146659 High |
| TCGA-22-1012 | -0.379488263 High |
| TCGA-34-8454 | -0.131920205 High |
| TCGA-60-2709 | -3.262863343 Low  |
| TCGA-85-A512 | 0.508024451 High  |
| TCGA-NC-A5HI | 0.632002674 High  |
| TCGA-18-3409 | 0.541584921 High  |
| TCGA-56-8307 | 1.100831319 High  |
| TCGA-85-8288 | 0.727302945 High  |
| TCGA-18-3410 | 2.174945862 High  |
| TCGA-22-1000 | -2.302436982 Low  |
| TCGA-66-2778 | -0.278647221 High |
| TCGA-34-5239 | 0.623726687 High  |
| TCGA-34-8455 | -0.061863877 High |
| TCGA-66-2765 | -0.523043999 High |
| TCGA-85-8277 | -0.696683872 High |
| TCGA-92-8065 | -0.499190912 High |
| TCGA-46-3766 | -2.223422752 Low  |
| TCGA-77-8131 | -2.431585374 Low  |
| TCGA-94-A5I4 | -0.225532157 High |
| TCGA-18-3407 | -1.428288952 Low  |
| TCGA-77-8139 | -1.622769703 Low  |
| TCGA-21-1078 | 1.066734384 High  |
| TCGA-18-3411 | -1.621191252 Low  |
| TCGA-66-2742 | -0.13971879 High  |
| TCGA-56-1622 | 0.344485884 High  |
| TCGA-77-A5G3 | 0.243460705 High  |
| TCGA-22-5482 | -0.511890403 High |
| TCGA-NK-A7XE | 0.273150604 High  |
| TCGA-22-5489 | -2.539552993 Low  |
| TCGA-O2-A52W | 0.566834374 High  |
| TCGA-52-7812 | 0.041715824 High  |
| TCGA-46-6025 | -0.184047081 High |
| TCGA-58-8391 | -0.101286049 High |
| TCGA-85-A50M | 0.207946479 High  |
| TCGA-18-3417 | -0.737819802 High |
| TCGA-60-2724 | 0.061846859 High  |
| TCGA-94-A5I6 | -0.105154612 High |



|              |                   |
|--------------|-------------------|
| TCGA-43-8116 | -0.127290432 High |
| TCGA-34-5241 | 0.637255246 High  |
| TCGA-77-7338 | -0.745502128 High |
| TCGA-56-7822 | 0.254744324 High  |
| TCGA-85-A4JC | -0.218403789 High |
| TCGA-66-2792 | -0.252122075 High |
| TCGA-98-A53A | 0.353099318 High  |
| TCGA-22-4594 | -3.46680348 Low   |
| TCGA-58-8386 | -0.055725102 High |
| TCGA-22-5481 | -0.590709777 High |
| TCGA-66-2754 | 2.053827103 High  |
| TCGA-21-1082 | 0.017446049 High  |
| TCGA-58-8392 | -0.300726982 High |
| TCGA-60-2713 | -0.478297837 High |
| TCGA-22-5479 | -1.084526761 Low  |
| TCGA-37-4133 | -0.36019729 High  |
| TCGA-63-A5MU | -0.448336605 High |
| TCGA-66-2769 | -0.760793446 High |
| TCGA-LA-A446 | -0.156334757 High |
| TCGA-66-2759 | -0.622966807 High |
| TCGA-22-4609 | -2.058630622 Low  |
| TCGA-66-2773 | -0.112976694 High |
| TCGA-66-2755 | -0.216236465 High |
| TCGA-77-8150 | -0.280818795 High |
| TCGA-37-A5EL | 0.678401409 High  |
| TCGA-77-8009 | -0.103286445 High |
| TCGA-33-AAS8 | -0.096661261 High |
| TCGA-58-A46N | -0.202447885 High |
| TCGA-33-AASD | -0.035832984 High |
| TCGA-63-A5MS | 0.488887336 High  |
| TCGA-43-A474 | -0.328302871 High |
| TCGA-43-6770 | -0.322126026 High |
| TCGA-22-4607 | 0.042314846 High  |
| TCGA-58-A46K | 0.048989723 High  |
| TCGA-77-7465 | 1.032128693 High  |
| TCGA-18-4721 | -1.898887205 Low  |
| TCGA-85-A4CL | 0.075521681 High  |
| TCGA-22-4604 | -1.231774363 Low  |
| TCGA-56-7730 | -0.368859856 High |
| TCGA-39-5039 | -0.223910727 High |
| TCGA-J1-A4AH | -1.599875492 Low  |
| TCGA-92-8063 | -0.223447574 High |
| TCGA-46-3769 | -0.580609062 High |
| TCGA-43-8118 | 0.066804227 High  |
| TCGA-NC-A5HO | 0.917257171 High  |
| TCGA-22-4605 | -0.763374738 High |
| TCGA-60-2714 | -1.245004315 Low  |
| TCGA-33-6738 | 0.162559746 High  |
| TCGA-63-A5MV | 1.588337173 High  |
| TCGA-85-A4CN | -0.694704651 High |
| TCGA-NC-A5HK | 0.973535556 High  |
| TCGA-43-3920 | 2.042073857 High  |
| TCGA-21-1072 | -0.238834592 High |
| TCGA-98-A53B | 1.641978695 High  |
| TCGA-85-8072 | -0.112186576 High |
| TCGA-68-A59J | 1.031847102 High  |
| TCGA-66-2766 | -0.278028993 High |
| TCGA-NC-A5HR | 0.834839001 High  |

|              |                   |
|--------------|-------------------|
| TCGA-NC-A5HE | 2.082004084 High  |
| TCGA-98-A53D | 2.723903082 High  |
| TCGA-66-2783 | -1.651771476 Low  |
| TCGA-77-7138 | 0.248015041 High  |
| TCGA-56-8629 | 0.360514375 High  |
| TCGA-79-5596 | -0.408746278 High |
| TCGA-63-A5MJ | -0.161086724 High |
| TCGA-56-6546 | -1.932282195 Low  |
| TCGA-51-4081 | 0.216405939 High  |
| TCGA-34-5927 | 1.516347051 High  |
| TCGA-85-8582 | 0.157081415 High  |
| TCGA-77-8154 | 0.268025454 High  |
| TCGA-77-6844 | 0.764260374 High  |
| TCGA-85-8580 | -0.073071091 High |
| TCGA-56-A4ZJ | 0.908445009 High  |
| TCGA-21-1083 | 1.055673543 High  |
| TCGA-46-3767 | 0.017362484 High  |
| TCGA-56-5898 | -0.415102646 High |
| TCGA-68-7757 | 0.045145307 High  |
| TCGA-56-A49D | 1.501345032 High  |
| TCGA-18-3412 | -0.302912675 High |
| TCGA-37-4132 | -0.607726157 High |
| TCGA-22-5483 | 0.03492057 High   |
| TCGA-85-A4JB | 0.222102727 High  |
| TCGA-60-2725 | -0.076331197 High |
| TCGA-77-7463 | -0.065785386 High |
| TCGA-33-AASJ | 0.091794948 High  |
| TCGA-43-7657 | -0.392452659 High |
| TCGA-22-A5C4 | 1.190221611 High  |
| TCGA-90-7769 | -0.330379153 High |
| TCGA-21-1077 | -1.482813217 Low  |
| TCGA-NC-A5HQ | 1.53060454 High   |
| TCGA-60-2696 | -0.687647973 High |
| TCGA-22-4591 | 0.033267325 High  |
| TCGA-77-8143 | 0.282248978 High  |
| TCGA-NK-A5CR | -0.551077235 High |
| TCGA-56-7823 | 0.244348064 High  |
| TCGA-63-A5MN | -2.4731655 Low    |
| TCGA-52-7622 | -0.623573495 High |

**Table S7-IPS score for each individual**

| ID           | ips_ctla4_neg_pd1_neg | ips_ctla4_neg_pd1_pos | ips_ctla4_pos_pd1_neg | ips_ctla4_pos_pd1_pos |
|--------------|-----------------------|-----------------------|-----------------------|-----------------------|
| TCGA-34-5234 | 8                     | 7                     | 8                     | 7                     |
| TCGA-96-7544 | 6                     | 6                     | 6                     | 6                     |
| TCGA-85-A513 | 8                     | 8                     | 9                     | 8                     |
| TCGA-85-8584 | 10                    | 9                     | 10                    | 9                     |
| TCGA-85-A511 | 8                     | 7                     | 7                     | 7                     |
| TCGA-66-2789 | 8                     | 6                     | 7                     | 6                     |
| TCGA-22-0940 | 8                     | 8                     | 8                     | 8                     |
| TCGA-96-A4JL | 8                     | 8                     | 8                     | 9                     |
| TCGA-77-8136 | 7                     | 7                     | 6                     | 7                     |
| TCGA-63-5131 | 7                     | 6                     | 7                     | 5                     |
| TCGA-90-7964 | 6                     | 5                     | 6                     | 4                     |
| TCGA-85-A5B5 | 6                     | 6                     | 6                     | 5                     |
| TCGA-37-3789 | 8                     | 8                     | 8                     | 8                     |
| TCGA-O2-A5IB | 7                     | 5                     | 7                     | 5                     |
| TCGA-58-8390 | 7                     | 5                     | 7                     | 5                     |
| TCGA-66-2777 | 7                     | 6                     | 7                     | 6                     |
| TCGA-77-8140 | 7                     | 6                     | 7                     | 5                     |
| TCGA-98-A538 | 7                     | 6                     | 6                     | 5                     |
| TCGA-66-2785 | 8                     | 9                     | 8                     | 9                     |
| TCGA-43-5670 | 8                     | 6                     | 8                     | 6                     |
| TCGA-22-5472 | 7                     | 6                     | 7                     | 5                     |
| TCGA-60-2704 | 6                     | 6                     | 6                     | 6                     |
| TCGA-77-6843 | 7                     | 6                     | 6                     | 5                     |
| TCGA-63-A5MG | 7                     | 6                     | 7                     | 6                     |
| TCGA-66-2734 | 6                     | 5                     | 5                     | 4                     |
| TCGA-43-2581 | 7                     | 6                     | 6                     | 6                     |
| TCGA-52-7811 | 8                     | 7                     | 8                     | 7                     |
| TCGA-85-8287 | 8                     | 8                     | 8                     | 8                     |
| TCGA-85-8355 | 7                     | 8                     | 7                     | 8                     |
| TCGA-94-7033 | 9                     | 8                     | 9                     | 7                     |
| TCGA-60-2697 | 9                     | 8                     | 9                     | 8                     |
| TCGA-77-8145 | 7                     | 6                     | 7                     | 6                     |
| TCGA-85-7844 | 7                     | 6                     | 6                     | 6                     |
| TCGA-39-5040 | 7                     | 7                     | 7                     | 6                     |
| TCGA-66-2795 | 7                     | 7                     | 7                     | 6                     |
| TCGA-33-4586 | 6                     | 6                     | 6                     | 6                     |
| TCGA-NC-A5HH | 6                     | 4                     | 6                     | 4                     |
| TCGA-22-1002 | 8                     | 7                     | 7                     | 6                     |
| TCGA-60-2695 | 7                     | 7                     | 7                     | 6                     |
| TCGA-77-A5G8 | 6                     | 6                     | 6                     | 5                     |
| TCGA-63-A5MP | 7                     | 8                     | 7                     | 8                     |
| TCGA-22-0944 | 9                     | 7                     | 8                     | 7                     |
| TCGA-21-1081 | 6                     | 4                     | 5                     | 4                     |
| TCGA-O2-A52V | 7                     | 6                     | 6                     | 6                     |
| TCGA-33-AASB | 7                     | 6                     | 7                     | 5                     |
| TCGA-63-5128 | 7                     | 5                     | 6                     | 5                     |
| TCGA-96-8170 | 8                     | 6                     | 7                     | 6                     |
| TCGA-63-A5MW | 8                     | 6                     | 7                     | 6                     |
| TCGA-37-3792 | 6                     | 7                     | 7                     | 7                     |
| TCGA-56-A4BX | 7                     | 6                     | 6                     | 5                     |
| TCGA-56-8083 | 8                     | 6                     | 7                     | 5                     |
| TCGA-98-A53H | 7                     | 7                     | 7                     | 7                     |
| TCGA-94-A4VJ | 9                     | 8                     | 9                     | 8                     |
| TCGA-43-7658 | 7                     | 7                     | 7                     | 7                     |
| TCGA-NC-A5HN | 9                     | 8                     | 9                     | 8                     |
| TCGA-63-7021 | 7                     | 7                     | 7                     | 7                     |
| TCGA-22-5471 | 9                     | 9                     | 8                     | 8                     |
| TCGA-77-8133 | 8                     | 8                     | 8                     | 8                     |
| TCGA-37-A5EM | 7                     | 6                     | 7                     | 6                     |
| TCGA-85-8071 | 8                     | 7                     | 8                     | 7                     |
| TCGA-NC-A5HP | 8                     | 6                     | 7                     | 6                     |
| TCGA-85-A4PA | 9                     | 9                     | 10                    | 10                    |
| TCGA-33-4582 | 7                     | 5                     | 6                     | 4                     |
| TCGA-43-2578 | 8                     | 7                     | 7                     | 6                     |
| TCGA-34-A5IX | 7                     | 6                     | 7                     | 5                     |
| TCGA-56-8504 | 8                     | 7                     | 7                     | 7                     |
| TCGA-18-5595 | 8                     | 7                     | 7                     | 6                     |
| TCGA-21-5784 | 9                     | 7                     | 8                     | 7                     |
| TCGA-90-A4ED | 8                     | 8                     | 8                     | 7                     |
| TCGA-MF-A522 | 7                     | 6                     | 7                     | 5                     |
| TCGA-46-3768 | 7                     | 6                     | 7                     | 6                     |
| TCGA-77-7335 | 7                     | 7                     | 7                     | 7                     |
| TCGA-56-A4BY | 8                     | 8                     | 8                     | 7                     |

|              |   |   |   |   |
|--------------|---|---|---|---|
| TCGA-85-8070 | 8 | 8 | 7 | 7 |
| TCGA-56-7579 | 7 | 5 | 7 | 5 |
| TCGA-NC-A5HG | 8 | 6 | 8 | 6 |
| TCGA-56-8305 | 7 | 6 | 7 | 5 |
| TCGA-60-2703 | 7 | 5 | 6 | 5 |
| TCGA-39-5036 | 9 | 8 | 8 | 7 |
| TCGA-33-6737 | 6 | 5 | 6 | 5 |
| TCGA-34-2608 | 8 | 7 | 7 | 7 |
| TCGA-39-5024 | 9 | 8 | 9 | 7 |
| TCGA-77-7142 | 8 | 6 | 7 | 6 |
| TCGA-85-8350 | 9 | 7 | 8 | 7 |
| TCGA-O2-A52Q | 7 | 7 | 7 | 8 |
| TCGA-68-8250 | 7 | 7 | 7 | 6 |
| TCGA-70-6723 | 9 | 7 | 8 | 7 |
| TCGA-68-8251 | 8 | 7 | 7 | 7 |
| TCGA-85-7697 | 9 | 7 | 8 | 7 |
| TCGA-66-2756 | 7 | 5 | 6 | 5 |
| TCGA-85-6561 | 7 | 7 | 7 | 7 |
| TCGA-94-7943 | 8 | 7 | 8 | 6 |
| TCGA-22-1011 | 8 | 7 | 7 | 7 |
| TCGA-85-8664 | 6 | 4 | 6 | 4 |
| TCGA-63-A5MH | 6 | 6 | 6 | 5 |
| TCGA-94-8490 | 7 | 6 | 6 | 5 |
| TCGA-85-8481 | 8 | 7 | 8 | 7 |
| TCGA-60-2716 | 7 | 6 | 7 | 5 |
| TCGA-O2-A52S | 7 | 6 | 7 | 6 |
| TCGA-51-4080 | 7 | 7 | 7 | 6 |
| TCGA-22-5485 | 7 | 6 | 6 | 5 |
| TCGA-85-6175 | 7 | 7 | 7 | 7 |
| TCGA-85-8276 | 8 | 7 | 8 | 7 |
| TCGA-77-8008 | 6 | 6 | 6 | 5 |
| TCGA-39-5028 | 7 | 7 | 7 | 6 |
| TCGA-34-5928 | 7 | 6 | 7 | 6 |
| TCGA-43-6773 | 8 | 9 | 8 | 8 |
| TCGA-63-A5MI | 7 | 6 | 7 | 5 |
| TCGA-63-A5ML | 7 | 8 | 7 | 7 |
| TCGA-39-5030 | 7 | 8 | 8 | 8 |
| TCGA-51-4079 | 7 | 7 | 7 | 7 |
| TCGA-22-5491 | 7 | 6 | 7 | 6 |
| TCGA-66-2744 | 7 | 8 | 7 | 8 |
| TCGA-33-4547 | 7 | 5 | 7 | 5 |
| TCGA-52-7810 | 7 | 5 | 6 | 5 |
| TCGA-77-7139 | 7 | 7 | 7 | 7 |
| TCGA-66-2800 | 7 | 6 | 6 | 6 |
| TCGA-33-4566 | 8 | 8 | 8 | 8 |
| TCGA-90-7766 | 7 | 7 | 7 | 7 |
| TCGA-60-2707 | 7 | 6 | 6 | 5 |
| TCGA-56-8628 | 7 | 6 | 7 | 6 |
| TCGA-85-8666 | 6 | 5 | 6 | 5 |
| TCGA-60-2721 | 8 | 8 | 8 | 8 |
| TCGA-22-4596 | 7 | 7 | 7 | 7 |
| TCGA-33-A5GW | 7 | 6 | 6 | 5 |
| TCGA-60-2715 | 8 | 7 | 8 | 7 |
| TCGA-85-8351 | 7 | 6 | 7 | 6 |
| TCGA-58-A46M | 7 | 8 | 7 | 7 |
| TCGA-37-4129 | 7 | 5 | 6 | 4 |
| TCGA-21-1075 | 6 | 5 | 5 | 5 |
| TCGA-43-7656 | 7 | 7 | 7 | 7 |
| TCGA-58-8388 | 7 | 7 | 7 | 7 |
| TCGA-98-A53J | 7 | 6 | 6 | 5 |
| TCGA-85-7696 | 9 | 7 | 8 | 7 |
| TCGA-34-5231 | 9 | 8 | 9 | 8 |
| TCGA-34-5929 | 8 | 7 | 8 | 6 |
| TCGA-22-5492 | 7 | 7 | 7 | 7 |
| TCGA-98-A53C | 8 | 8 | 8 | 8 |
| TCGA-94-8491 | 8 | 7 | 8 | 7 |
| TCGA-90-7767 | 8 | 8 | 7 | 8 |
| TCGA-96-8169 | 7 | 6 | 7 | 6 |
| TCGA-34-2596 | 7 | 8 | 6 | 7 |
| TCGA-56-A62T | 7 | 6 | 7 | 6 |
| TCGA-21-1071 | 6 | 6 | 6 | 6 |
| TCGA-22-5480 | 9 | 9 | 9 | 9 |
| TCGA-77-A5GH | 7 | 8 | 7 | 8 |
| TCGA-L3-A4E7 | 7 | 7 | 7 | 6 |
| TCGA-60-2723 | 7 | 8 | 7 | 8 |
| TCGA-37-3783 | 9 | 8 | 9 | 8 |

|              |   |   |    |   |
|--------------|---|---|----|---|
| TCGA-66-2763 | 6 | 6 | 6  | 6 |
| TCGA-63-6202 | 7 | 7 | 7  | 7 |
| TCGA-L3-A524 | 7 | 5 | 6  | 5 |
| TCGA-98-8021 | 8 | 6 | 7  | 6 |
| TCGA-77-A5GF | 8 | 8 | 7  | 8 |
| TCGA-66-2787 | 7 | 7 | 6  | 7 |
| TCGA-77-8138 | 7 | 6 | 7  | 6 |
| TCGA-63-A5MR | 8 | 7 | 7  | 6 |
| TCGA-66-2768 | 9 | 8 | 8  | 8 |
| TCGA-77-8146 | 7 | 6 | 7  | 6 |
| TCGA-43-A56V | 6 | 4 | 6  | 4 |
| TCGA-22-1005 | 9 | 9 | 10 | 9 |
| TCGA-66-2780 | 8 | 7 | 8  | 7 |
| TCGA-77-8156 | 8 | 7 | 7  | 7 |
| TCGA-66-2790 | 8 | 8 | 8  | 7 |
| TCGA-98-8022 | 9 | 8 | 9  | 8 |
| TCGA-58-A46L | 7 | 7 | 7  | 7 |
| TCGA-O2-A52N | 9 | 8 | 9  | 8 |
| TCGA-63-7022 | 8 | 7 | 8  | 7 |
| TCGA-37-4135 | 8 | 7 | 7  | 6 |
| TCGA-66-2727 | 7 | 7 | 7  | 7 |
| TCGA-34-7107 | 7 | 7 | 7  | 7 |
| TCGA-NC-A5HD | 7 | 5 | 6  | 4 |
| TCGA-56-7582 | 6 | 5 | 6  | 5 |
| TCGA-18-3415 | 8 | 8 | 8  | 8 |
| TCGA-56-7580 | 8 | 7 | 8  | 6 |
| TCGA-33-AASL | 8 | 7 | 8  | 7 |
| TCGA-43-2576 | 7 | 6 | 7  | 6 |
| TCGA-77-A5FZ | 7 | 8 | 8  | 8 |
| TCGA-33-4583 | 9 | 9 | 8  | 9 |
| TCGA-46-6026 | 7 | 5 | 6  | 4 |
| TCGA-18-3414 | 8 | 7 | 7  | 6 |
| TCGA-63-A5MY | 5 | 3 | 4  | 3 |
| TCGA-56-8082 | 7 | 6 | 6  | 5 |
| TCGA-60-2712 | 8 | 8 | 8  | 8 |
| TCGA-60-2698 | 8 | 7 | 7  | 7 |
| TCGA-52-7809 | 8 | 6 | 7  | 6 |
| TCGA-34-5232 | 8 | 7 | 8  | 8 |
| TCGA-18-4083 | 6 | 7 | 6  | 7 |
| TCGA-37-A5EN | 9 | 8 | 8  | 7 |
| TCGA-85-A510 | 8 | 7 | 8  | 7 |
| TCGA-60-2720 | 9 | 8 | 9  | 7 |
| TCGA-60-2710 | 7 | 7 | 7  | 7 |
| TCGA-94-8035 | 6 | 5 | 6  | 5 |
| TCGA-22-4593 | 7 | 6 | 7  | 5 |
| TCGA-18-3419 | 6 | 6 | 6  | 5 |
| TCGA-66-2793 | 7 | 5 | 6  | 4 |
| TCGA-21-1079 | 7 | 7 | 7  | 7 |
| TCGA-92-8064 | 7 | 8 | 7  | 9 |
| TCGA-63-7023 | 9 | 8 | 9  | 7 |
| TCGA-60-2706 | 7 | 7 | 7  | 7 |
| TCGA-98-7454 | 7 | 7 | 7  | 7 |
| TCGA-37-4141 | 8 | 8 | 8  | 7 |
| TCGA-22-5477 | 7 | 7 | 6  | 7 |
| TCGA-33-4533 | 8 | 6 | 8  | 6 |
| TCGA-77-8128 | 7 | 6 | 7  | 5 |
| TCGA-56-8309 | 7 | 8 | 7  | 8 |
| TCGA-56-A5DR | 6 | 5 | 6  | 5 |
| TCGA-37-4130 | 8 | 8 | 8  | 8 |
| TCGA-58-A46J | 7 | 6 | 7  | 5 |
| TCGA-43-6143 | 8 | 7 | 7  | 6 |
| TCGA-77-A5G6 | 7 | 5 | 6  | 5 |
| TCGA-39-5031 | 8 | 7 | 7  | 6 |
| TCGA-90-A59Q | 8 | 8 | 8  | 8 |
| TCGA-68-7755 | 7 | 7 | 7  | 7 |
| TCGA-66-2767 | 8 | 8 | 8  | 9 |
| TCGA-66-2771 | 7 | 7 | 7  | 7 |
| TCGA-85-6560 | 6 | 6 | 6  | 6 |
| TCGA-56-8304 | 7 | 7 | 7  | 6 |
| TCGA-56-7221 | 8 | 6 | 7  | 5 |
| TCGA-18-3421 | 7 | 6 | 6  | 6 |
| TCGA-51-6867 | 7 | 8 | 7  | 7 |
| TCGA-NC-A5HL | 8 | 9 | 8  | 9 |
| TCGA-77-A5G1 | 7 | 6 | 7  | 6 |
| TCGA-96-7545 | 7 | 7 | 7  | 7 |
| TCGA-NC-A5HM | 9 | 8 | 9  | 8 |

|              |    |   |   |   |
|--------------|----|---|---|---|
| TCGA-33-4589 | 8  | 8 | 8 | 8 |
| TCGA-85-A4QR | 7  | 6 | 6 | 5 |
| TCGA-60-2711 | 8  | 7 | 8 | 7 |
| TCGA-33-4532 | 7  | 5 | 6 | 5 |
| TCGA-NC-A5HJ | 8  | 9 | 8 | 8 |
| TCGA-21-5787 | 8  | 8 | 8 | 8 |
| TCGA-85-8479 | 7  | 5 | 7 | 5 |
| TCGA-34-5240 | 6  | 6 | 6 | 5 |
| TCGA-77-8148 | 8  | 7 | 7 | 6 |
| TCGA-56-8626 | 8  | 6 | 7 | 5 |
| TCGA-33-A4WN | 7  | 6 | 7 | 6 |
| TCGA-39-5027 | 8  | 7 | 7 | 6 |
| TCGA-56-8503 | 7  | 7 | 7 | 7 |
| TCGA-56-8623 | 8  | 8 | 8 | 8 |
| TCGA-77-6845 | 6  | 5 | 5 | 4 |
| TCGA-85-A50Z | 7  | 6 | 6 | 5 |
| TCGA-77-8144 | 8  | 7 | 7 | 7 |
| TCGA-85-A53L | 7  | 5 | 6 | 5 |
| TCGA-XC-AA0X | 7  | 6 | 7 | 6 |
| TCGA-66-2782 | 7  | 6 | 7 | 6 |
| TCGA-68-A59I | 7  | 6 | 7 | 6 |
| TCGA-77-A5G7 | 8  | 6 | 8 | 6 |
| TCGA-90-A4EE | 7  | 8 | 8 | 8 |
| TCGA-98-8023 | 8  | 7 | 8 | 7 |
| TCGA-34-8456 | 7  | 7 | 7 | 7 |
| TCGA-56-5897 | 7  | 7 | 7 | 7 |
| TCGA-66-2786 | 8  | 7 | 8 | 7 |
| TCGA-39-5037 | 9  | 8 | 8 | 7 |
| TCGA-56-6545 | 7  | 7 | 7 | 7 |
| TCGA-NK-A5CT | 7  | 7 | 7 | 6 |
| TCGA-22-1016 | 7  | 6 | 6 | 5 |
| TCGA-39-5016 | 8  | 9 | 8 | 8 |
| TCGA-63-A5MM | 8  | 8 | 8 | 9 |
| TCGA-33-4538 | 8  | 8 | 8 | 8 |
| TCGA-63-A5MT | 7  | 7 | 7 | 6 |
| TCGA-18-3416 | 8  | 9 | 8 | 9 |
| TCGA-66-2753 | 7  | 6 | 6 | 5 |
| TCGA-63-7020 | 8  | 7 | 8 | 7 |
| TCGA-56-8308 | 8  | 8 | 7 | 7 |
| TCGA-18-3408 | 7  | 7 | 6 | 6 |
| TCGA-NK-A5D1 | 9  | 7 | 8 | 7 |
| TCGA-85-6798 | 7  | 6 | 6 | 6 |
| TCGA-22-4599 | 7  | 7 | 7 | 7 |
| TCGA-56-A4ZK | 6  | 6 | 6 | 6 |
| TCGA-56-7731 | 7  | 6 | 7 | 6 |
| TCGA-92-7341 | 7  | 6 | 6 | 6 |
| TCGA-85-8353 | 8  | 7 | 8 | 7 |
| TCGA-85-A4QQ | 8  | 6 | 7 | 6 |
| TCGA-77-6842 | 6  | 8 | 6 | 8 |
| TCGA-22-4595 | 7  | 6 | 7 | 6 |
| TCGA-33-4587 | 7  | 6 | 7 | 5 |
| TCGA-56-A4BW | 8  | 7 | 8 | 7 |
| TCGA-21-1076 | 7  | 7 | 7 | 7 |
| TCGA-6A-AB49 | 7  | 6 | 7 | 6 |
| TCGA-63-A5M9 | 7  | 7 | 7 | 7 |
| TCGA-39-5022 | 9  | 9 | 9 | 9 |
| TCGA-43-6771 | 7  | 7 | 7 | 7 |
| TCGA-98-8020 | 8  | 7 | 7 | 7 |
| TCGA-77-7141 | 7  | 7 | 7 | 6 |
| TCGA-92-7340 | 7  | 6 | 7 | 6 |
| TCGA-56-8622 | 8  | 7 | 7 | 6 |
| TCGA-70-6722 | 7  | 8 | 7 | 7 |
| TCGA-43-A56U | 8  | 8 | 8 | 8 |
| TCGA-66-2770 | 7  | 7 | 7 | 7 |
| TCGA-85-7710 | 8  | 8 | 8 | 7 |
| TCGA-58-8387 | 8  | 9 | 8 | 9 |
| TCGA-85-8352 | 7  | 5 | 6 | 5 |
| TCGA-21-5786 | 8  | 6 | 7 | 6 |
| TCGA-33-AASI | 10 | 9 | 9 | 9 |
| TCGA-56-8625 | 7  | 7 | 7 | 7 |
| TCGA-34-2600 | 7  | 5 | 7 | 5 |
| TCGA-60-2726 | 9  | 8 | 9 | 7 |
| TCGA-77-8153 | 7  | 5 | 6 | 5 |
| TCGA-66-2791 | 7  | 8 | 7 | 8 |
| TCGA-68-7756 | 7  | 6 | 7 | 6 |
| TCGA-94-7557 | 6  | 5 | 6 | 5 |

|              |   |   |   |   |
|--------------|---|---|---|---|
| TCGA-56-A5DS | 8 | 6 | 7 | 6 |
| TCGA-22-4613 | 7 | 7 | 7 | 7 |
| TCGA-77-8130 | 8 | 7 | 7 | 6 |
| TCGA-21-1080 | 6 | 6 | 6 | 5 |
| TCGA-98-A53I | 8 | 8 | 8 | 7 |
| TCGA-34-5236 | 7 | 5 | 6 | 5 |
| TCGA-21-5782 | 8 | 7 | 8 | 6 |
| TCGA-60-2708 | 6 | 6 | 6 | 6 |
| TCGA-96-A4JK | 8 | 7 | 8 | 7 |
| TCGA-66-2788 | 7 | 7 | 7 | 7 |
| TCGA-56-8624 | 8 | 6 | 7 | 6 |
| TCGA-22-5473 | 7 | 7 | 6 | 6 |
| TCGA-21-A5DI | 7 | 6 | 7 | 5 |
| TCGA-85-8049 | 7 | 7 | 7 | 7 |
| TCGA-21-5783 | 8 | 6 | 7 | 6 |
| TCGA-46-3765 | 8 | 7 | 7 | 6 |
| TCGA-39-5021 | 8 | 7 | 7 | 7 |
| TCGA-90-6837 | 7 | 6 | 6 | 6 |
| TCGA-39-5011 | 7 | 8 | 7 | 7 |
| TCGA-39-5019 | 8 | 7 | 7 | 7 |
| TCGA-98-A539 | 7 | 6 | 6 | 5 |
| TCGA-66-2781 | 8 | 7 | 8 | 6 |
| TCGA-37-5819 | 8 | 6 | 7 | 6 |
| TCGA-56-8201 | 6 | 7 | 7 | 7 |
| TCGA-63-A5MB | 7 | 7 | 7 | 6 |
| TCGA-60-2722 | 7 | 7 | 6 | 6 |
| TCGA-85-8048 | 8 | 8 | 8 | 8 |
| TCGA-56-7223 | 6 | 4 | 5 | 4 |
| TCGA-43-8115 | 7 | 7 | 7 | 7 |
| TCGA-18-5592 | 8 | 7 | 8 | 7 |
| TCGA-77-7337 | 7 | 6 | 7 | 6 |
| TCGA-60-2719 | 7 | 6 | 7 | 6 |
| TCGA-22-5478 | 7 | 5 | 6 | 5 |
| TCGA-66-2757 | 8 | 7 | 7 | 6 |
| TCGA-18-3406 | 9 | 8 | 9 | 8 |
| TCGA-77-A5GB | 8 | 7 | 8 | 7 |
| TCGA-21-1070 | 7 | 8 | 7 | 8 |
| TCGA-43-A475 | 7 | 9 | 7 | 9 |
| TCGA-85-7698 | 7 | 8 | 7 | 8 |
| TCGA-85-7843 | 7 | 6 | 6 | 5 |
| TCGA-NC-A5HT | 9 | 7 | 8 | 6 |
| TCGA-58-8393 | 7 | 7 | 7 | 7 |
| TCGA-66-2737 | 7 | 7 | 7 | 7 |
| TCGA-LA-A7SW | 6 | 5 | 6 | 5 |
| TCGA-77-8007 | 6 | 7 | 6 | 7 |
| TCGA-85-8354 | 7 | 6 | 7 | 6 |
| TCGA-22-5474 | 8 | 9 | 8 | 9 |
| TCGA-77-7140 | 6 | 5 | 5 | 5 |
| TCGA-22-4601 | 8 | 7 | 8 | 7 |
| TCGA-66-2794 | 8 | 9 | 8 | 9 |
| TCGA-22-1017 | 7 | 7 | 7 | 7 |
| TCGA-77-A5GA | 7 | 7 | 7 | 6 |
| TCGA-56-7222 | 8 | 6 | 8 | 6 |
| TCGA-85-7699 | 7 | 7 | 7 | 7 |
| TCGA-66-2758 | 7 | 7 | 7 | 7 |
| TCGA-85-7950 | 8 | 8 | 8 | 8 |
| TCGA-39-5034 | 8 | 7 | 7 | 7 |
| TCGA-85-8052 | 7 | 6 | 7 | 6 |
| TCGA-43-3394 | 7 | 7 | 7 | 6 |
| TCGA-NK-A5CX | 8 | 7 | 8 | 7 |
| TCGA-39-5035 | 8 | 9 | 8 | 9 |
| TCGA-43-6647 | 6 | 7 | 6 | 7 |
| TCGA-18-4086 | 8 | 8 | 8 | 8 |
| TCGA-NC-A5HF | 6 | 5 | 6 | 4 |
| TCGA-39-5029 | 8 | 6 | 7 | 6 |
| TCGA-43-5668 | 7 | 8 | 7 | 8 |
| TCGA-22-1012 | 7 | 6 | 7 | 6 |
| TCGA-34-8454 | 8 | 7 | 8 | 7 |
| TCGA-60-2709 | 7 | 8 | 7 | 8 |
| TCGA-85-A512 | 7 | 6 | 7 | 6 |
| TCGA-NC-A5HI | 6 | 4 | 6 | 4 |
| TCGA-18-3409 | 7 | 7 | 7 | 6 |
| TCGA-56-8307 | 8 | 8 | 8 | 8 |
| TCGA-85-8288 | 9 | 8 | 8 | 8 |
| TCGA-18-3410 | 7 | 9 | 7 | 9 |
| TCGA-22-1000 | 7 | 7 | 8 | 7 |

|              |    |   |    |   |
|--------------|----|---|----|---|
| TCGA-66-2778 | 7  | 6 | 7  | 5 |
| TCGA-34-5239 | 8  | 8 | 7  | 7 |
| TCGA-34-8455 | 8  | 7 | 7  | 6 |
| TCGA-66-2765 | 8  | 8 | 8  | 8 |
| TCGA-85-8277 | 8  | 8 | 7  | 8 |
| TCGA-92-8065 | 7  | 6 | 6  | 6 |
| TCGA-46-3766 | 8  | 7 | 8  | 7 |
| TCGA-77-8131 | 7  | 7 | 7  | 7 |
| TCGA-94-A514 | 7  | 6 | 7  | 5 |
| TCGA-18-3407 | 7  | 7 | 7  | 7 |
| TCGA-77-8139 | 8  | 7 | 7  | 6 |
| TCGA-21-1078 | 8  | 7 | 8  | 6 |
| TCGA-18-3411 | 6  | 6 | 6  | 5 |
| TCGA-66-2742 | 7  | 6 | 6  | 5 |
| TCGA-56-1622 | 7  | 7 | 7  | 7 |
| TCGA-77-A5G3 | 7  | 7 | 6  | 6 |
| TCGA-22-5482 | 8  | 6 | 7  | 6 |
| TCGA-NK-A7XE | 8  | 7 | 8  | 6 |
| TCGA-22-5489 | 8  | 8 | 8  | 8 |
| TCGA-O2-A52W | 7  | 5 | 6  | 5 |
| TCGA-52-7812 | 8  | 9 | 8  | 8 |
| TCGA-46-6025 | 7  | 6 | 6  | 6 |
| TCGA-58-8391 | 7  | 6 | 6  | 5 |
| TCGA-85-A50M | 7  | 6 | 6  | 6 |
| TCGA-18-3417 | 8  | 7 | 8  | 7 |
| TCGA-60-2724 | 7  | 6 | 6  | 5 |
| TCGA-94-A516 | 6  | 6 | 6  | 5 |
| TCGA-43-8116 | 8  | 7 | 8  | 7 |
| TCGA-34-5241 | 8  | 7 | 8  | 7 |
| TCGA-77-7338 | 7  | 6 | 6  | 5 |
| TCGA-56-7822 | 7  | 6 | 7  | 5 |
| TCGA-85-A4JC | 8  | 6 | 7  | 6 |
| TCGA-66-2792 | 7  | 7 | 6  | 6 |
| TCGA-98-A53A | 7  | 6 | 7  | 6 |
| TCGA-22-4594 | 8  | 7 | 7  | 7 |
| TCGA-58-8386 | 7  | 7 | 6  | 6 |
| TCGA-22-5481 | 8  | 8 | 8  | 8 |
| TCGA-66-2754 | 7  | 5 | 6  | 5 |
| TCGA-21-1082 | 8  | 7 | 8  | 6 |
| TCGA-58-8392 | 8  | 7 | 7  | 6 |
| TCGA-60-2713 | 7  | 7 | 7  | 7 |
| TCGA-22-5479 | 7  | 7 | 7  | 7 |
| TCGA-37-4133 | 8  | 8 | 7  | 8 |
| TCGA-63-A5MU | 7  | 6 | 7  | 6 |
| TCGA-66-2769 | 7  | 7 | 7  | 7 |
| TCGA-LA-A446 | 7  | 6 | 6  | 6 |
| TCGA-66-2759 | 5  | 7 | 5  | 6 |
| TCGA-22-4609 | 7  | 7 | 7  | 7 |
| TCGA-66-2773 | 7  | 7 | 6  | 6 |
| TCGA-66-2755 | 7  | 8 | 7  | 7 |
| TCGA-77-8150 | 7  | 7 | 7  | 7 |
| TCGA-37-A5EL | 10 | 9 | 10 | 8 |
| TCGA-77-8009 | 7  | 6 | 6  | 6 |
| TCGA-33-AAS8 | 7  | 6 | 7  | 6 |
| TCGA-58-A46N | 6  | 6 | 6  | 6 |
| TCGA-33-AASD | 8  | 7 | 8  | 6 |
| TCGA-63-A5MS | 8  | 7 | 8  | 7 |
| TCGA-43-A474 | 7  | 5 | 6  | 4 |
| TCGA-43-6770 | 6  | 6 | 6  | 5 |
| TCGA-22-4607 | 7  | 6 | 7  | 6 |
| TCGA-58-A46K | 8  | 9 | 8  | 8 |
| TCGA-77-7465 | 7  | 7 | 7  | 7 |
| TCGA-18-4721 | 7  | 8 | 7  | 8 |
| TCGA-85-A4CL | 7  | 6 | 7  | 6 |
| TCGA-22-4604 | 7  | 7 | 7  | 7 |
| TCGA-56-7730 | 7  | 6 | 7  | 6 |
| TCGA-39-5039 | 8  | 7 | 8  | 6 |
| TCGA-J1-A4AH | 7  | 6 | 6  | 6 |
| TCGA-92-8063 | 6  | 5 | 6  | 5 |
| TCGA-46-3769 | 8  | 8 | 8  | 8 |
| TCGA-43-8118 | 7  | 6 | 6  | 5 |
| TCGA-NC-A5HO | 7  | 5 | 6  | 5 |
| TCGA-22-4605 | 6  | 5 | 6  | 5 |
| TCGA-60-2714 | 7  | 8 | 7  | 8 |
| TCGA-33-6738 | 8  | 6 | 7  | 6 |
| TCGA-63-A5MV | 6  | 6 | 6  | 6 |



|              |   |   |   |   |
|--------------|---|---|---|---|
| TCGA-85-A4CN | 8 | 7 | 7 | 7 |
| TCGA-NC-A5HK | 7 | 8 | 6 | 7 |
| TCGA-43-3920 | 6 | 6 | 6 | 6 |
| TCGA-21-1072 | 7 | 7 | 7 | 6 |
| TCGA-98-A53B | 7 | 6 | 7 | 6 |
| TCGA-85-8072 | 8 | 8 | 8 | 8 |
| TCGA-68-A59J | 8 | 8 | 8 | 8 |
| TCGA-66-2766 | 7 | 7 | 7 | 7 |
| TCGA-NC-A5HR | 8 | 7 | 7 | 7 |
| TCGA-NC-A5HE | 7 | 8 | 7 | 8 |
| TCGA-98-A53D | 7 | 7 | 7 | 7 |
| TCGA-66-2783 | 7 | 7 | 7 | 7 |
| TCGA-77-7138 | 8 | 6 | 7 | 6 |
| TCGA-56-8629 | 7 | 6 | 7 | 6 |
| TCGA-79-5596 | 7 | 6 | 7 | 6 |
| TCGA-63-A5MJ | 7 | 7 | 6 | 6 |
| TCGA-56-6546 | 8 | 7 | 7 | 7 |
| TCGA-51-4081 | 6 | 5 | 6 | 5 |
| TCGA-34-5927 | 7 | 5 | 6 | 4 |
| TCGA-85-8582 | 7 | 7 | 7 | 6 |
| TCGA-77-8154 | 8 | 6 | 7 | 5 |
| TCGA-77-6844 | 7 | 6 | 7 | 6 |
| TCGA-85-8580 | 7 | 6 | 7 | 6 |
| TCGA-56-A4ZJ | 7 | 6 | 7 | 6 |
| TCGA-21-1083 | 7 | 7 | 7 | 7 |
| TCGA-46-3767 | 8 | 7 | 7 | 7 |
| TCGA-56-5898 | 8 | 7 | 7 | 6 |
| TCGA-68-7757 | 7 | 6 | 7 | 6 |
| TCGA-56-A49D | 8 | 7 | 7 | 7 |
| TCGA-18-3412 | 8 | 7 | 7 | 6 |
| TCGA-37-4132 | 9 | 8 | 9 | 9 |
| TCGA-22-5483 | 7 | 6 | 7 | 6 |
| TCGA-85-A4JB | 7 | 5 | 6 | 5 |
| TCGA-60-2725 | 7 | 7 | 7 | 7 |
| TCGA-77-7463 | 6 | 6 | 6 | 5 |
| TCGA-33-AASJ | 8 | 8 | 8 | 8 |
| TCGA-43-7657 | 9 | 7 | 8 | 7 |
| TCGA-22-A5C4 | 6 | 4 | 5 | 4 |
| TCGA-90-7769 | 6 | 6 | 6 | 5 |
| TCGA-21-1077 | 7 | 7 | 7 | 6 |
| TCGA-NC-A5HQ | 7 | 7 | 7 | 7 |
| TCGA-60-2696 | 7 | 6 | 7 | 6 |
| TCGA-22-4591 | 8 | 6 | 7 | 6 |
| TCGA-77-8143 | 6 | 6 | 6 | 5 |
| TCGA-NK-A5CR | 6 | 5 | 5 | 5 |
| TCGA-56-7823 | 7 | 6 | 6 | 5 |
| TCGA-63-A5MN | 8 | 9 | 8 | 9 |
| TCGA-52-7622 | 7 | 8 | 7 | 8 |
