# Supplementary material for: Characterization of the Immune Microenvironmental Landscape of Lung Squamous Cell Carcinoma with Immune Cell Infiltration
Source: Hindawi journal article supplement (doi:10.1155/2022/2361507), 2022-11-11

A

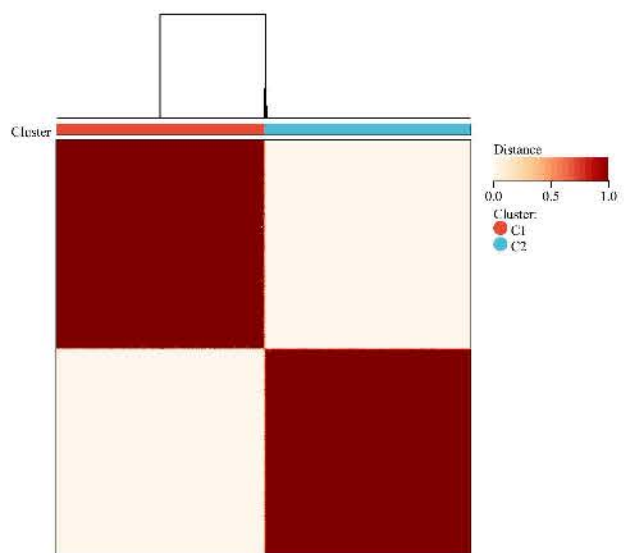

B

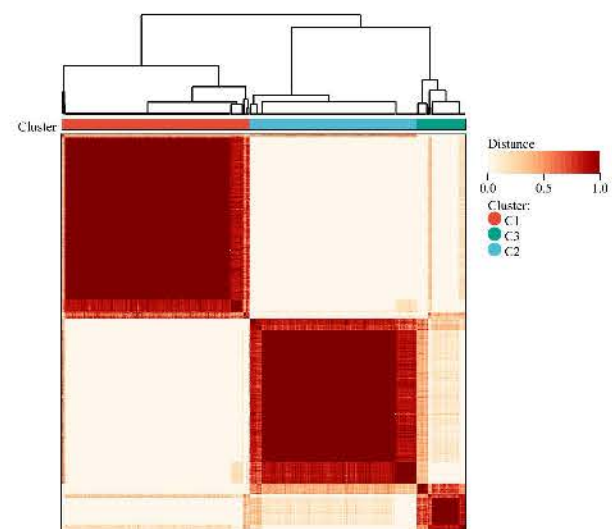

C

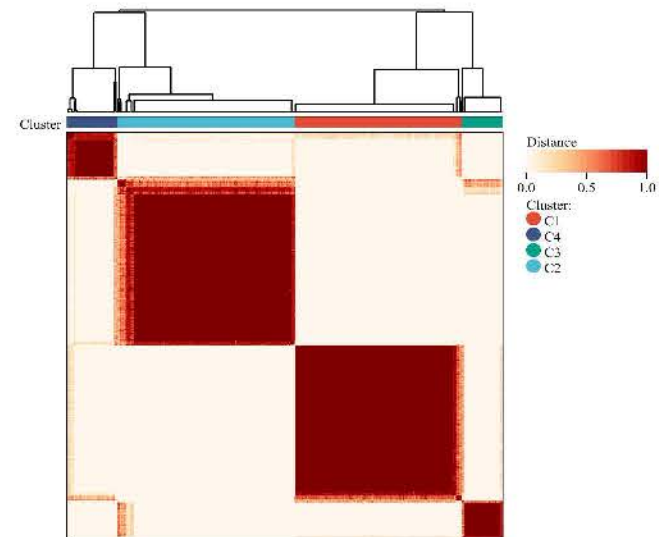

D

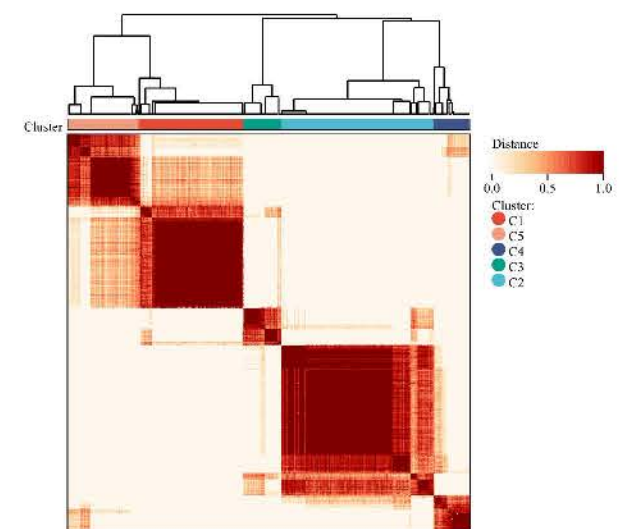

E

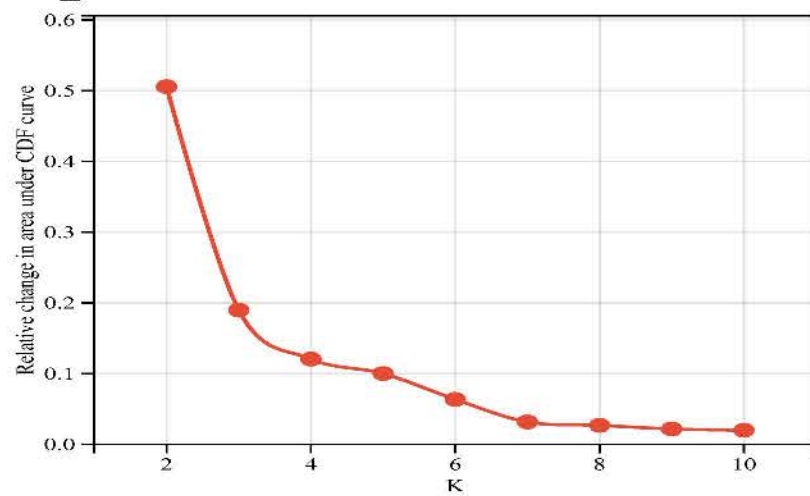

F

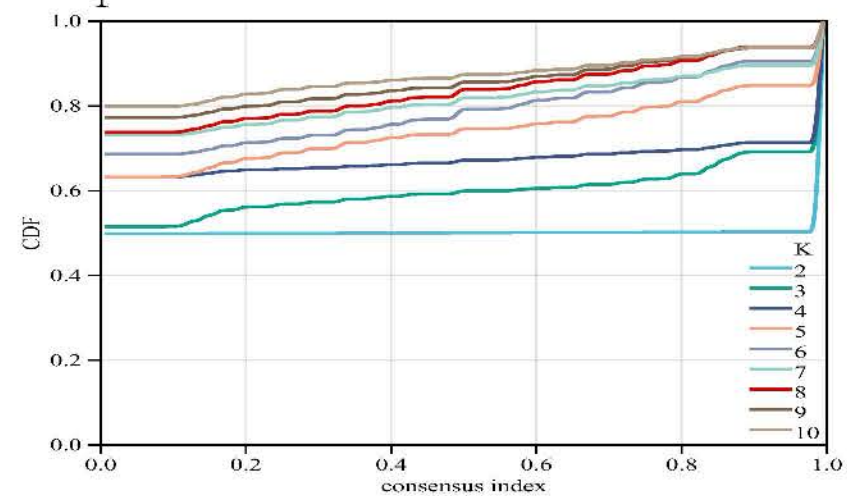

G

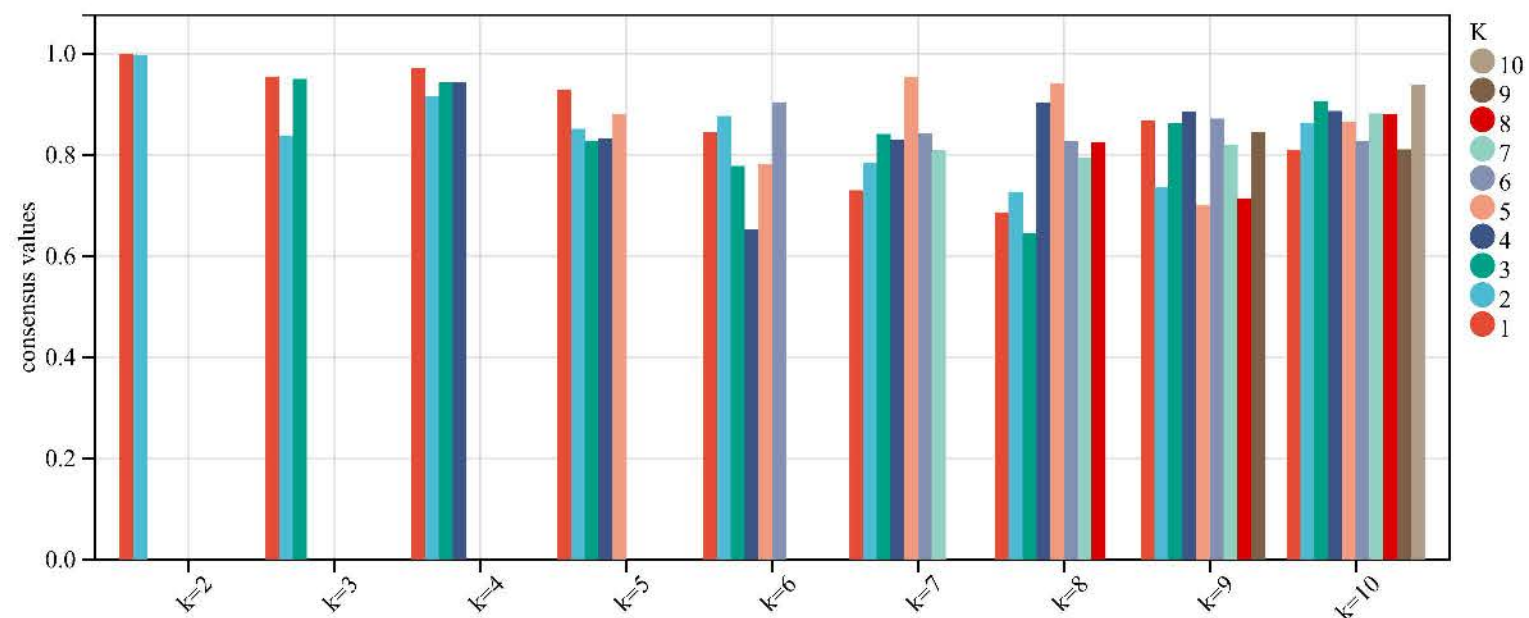

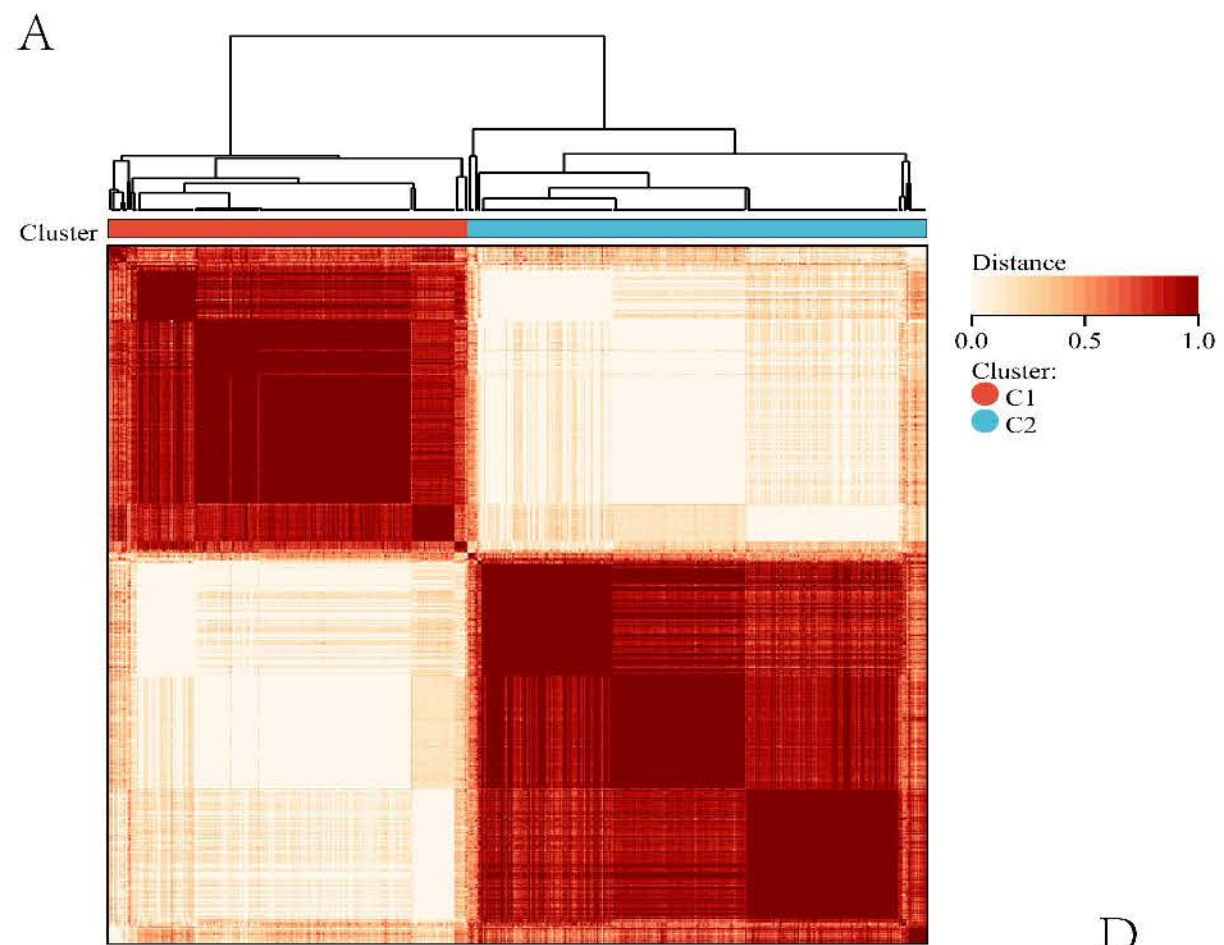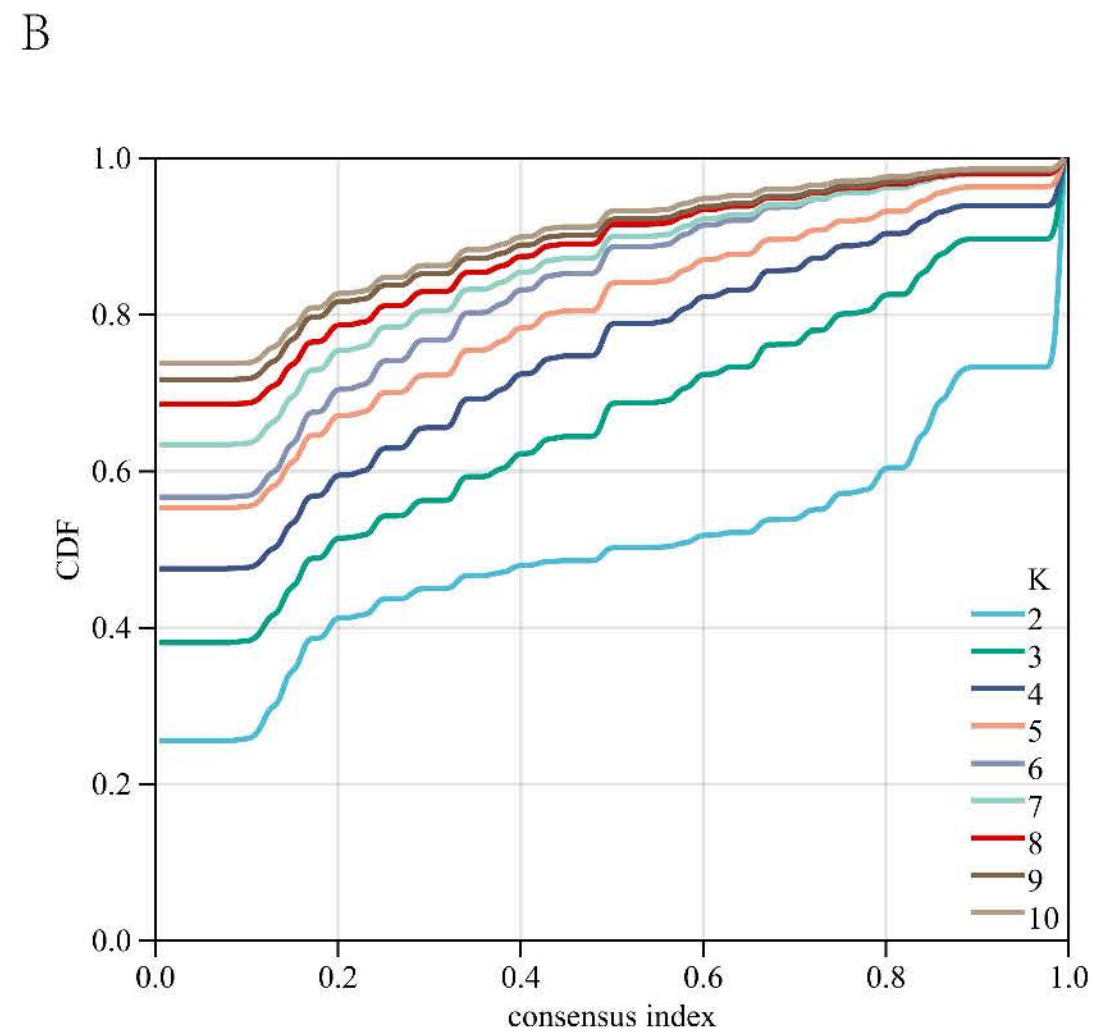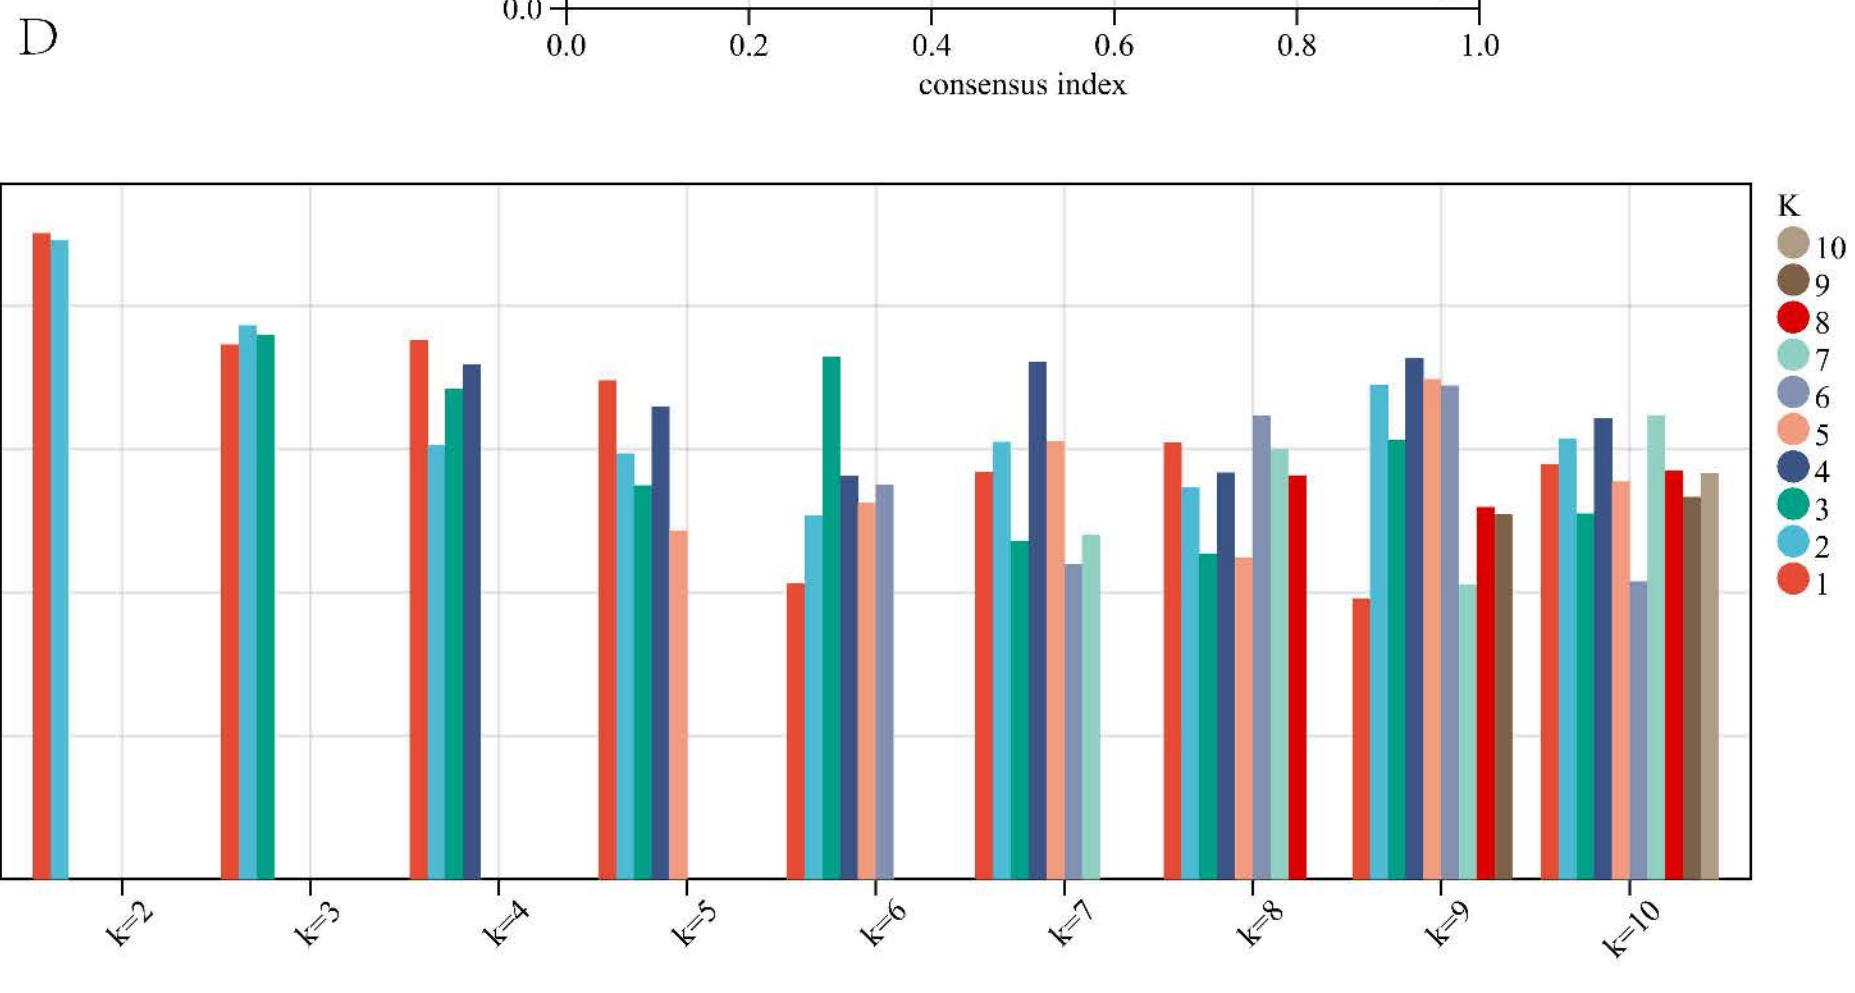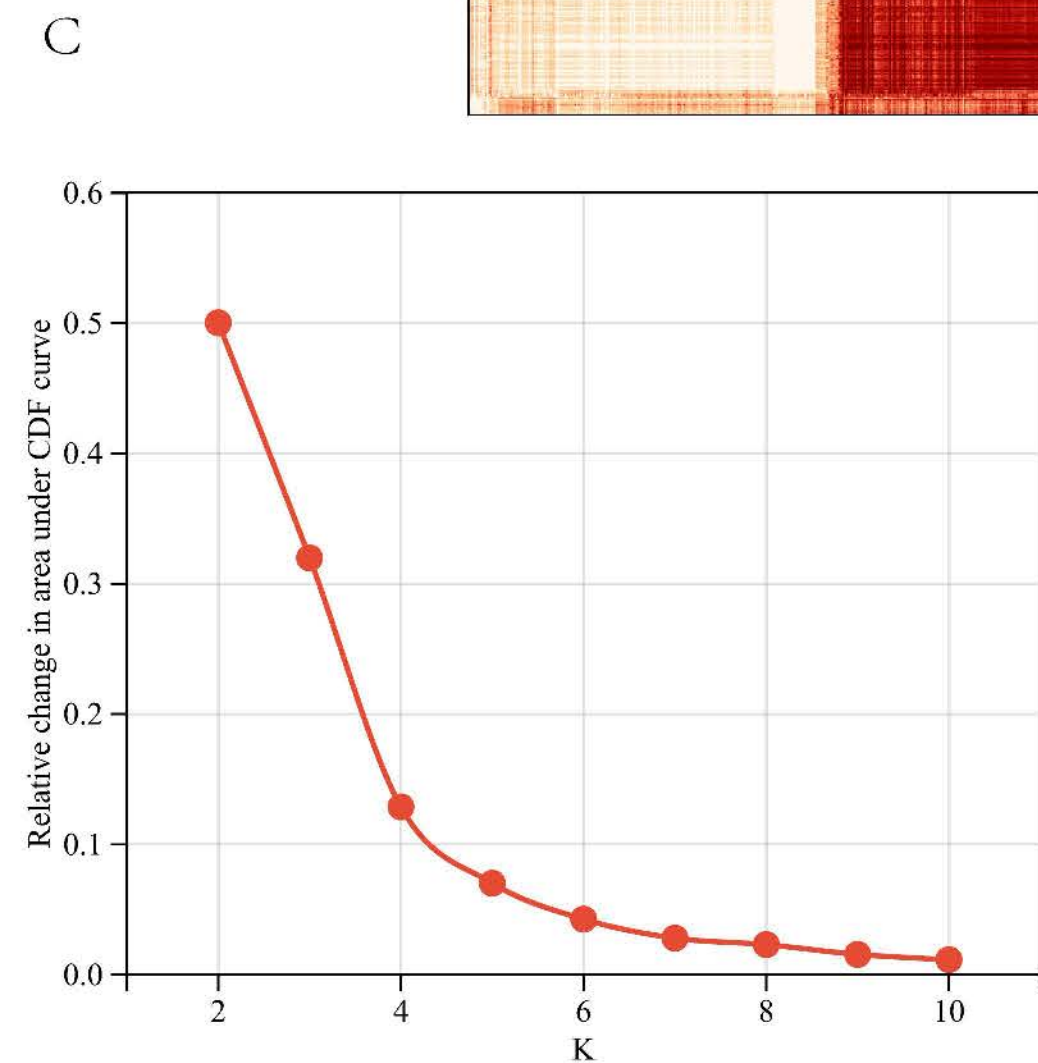

Supplement: f2 [file 2361507.f2.pdf]
